# Supplementary material for: Characterization of the USDA Cucurbita pepo, C. moschata, and C. maxima germplasm collections
Source: Front Plant Sci. 2023 Mar 13;14:1130814. doi: 10.3389/fpls.2023.1130814 (PMC10040574; doi:10.3389/fpls.2023.1130814)
Supplement: Supplementary file 2 [file Table_1.xlsx]

## Sheet: pepo_meta
accession_id	removed	country	accession_name	taxonomy	narrative	cultivar_class	improvement_status	region	1	2	3	4	5	6	7	8	9	10	grp	pos
PI_442313	No	Mexico	Calabaza de India	Cucurbita pepo	Fruits white with green stripes, creamy white at maturity, flattened-round, 13 cm long, 16cm diam.	NA	Landrace	South/Latin America	1e-05	0.925659	1e-05	0.074261	1e-05	1e-05	1e-05	1e-05	1e-05	1e-05	6	141
PI_438696	No	Mexico	WC 2412	Cucurbita pepo	Seeds tan. Received as Cucurbita ficifolia.	NA	Landrace	South/Latin America	1e-05	0.728891	0.02913	1e-05	1e-05	0.237353	0.004566	1e-05	1e-05	1e-05	6	164
PI_438699	No	Mexico	WC 2072	Cucurbita pepo	Fruit oblate, slightly ribbed, dull yellow and green, rind hard, flesh orange. Received as Cucurbita mixta.	NA	Landrace	South/Latin America	1e-05	0.548188	0.029314	1e-05	1e-05	0.422428	1e-05	1e-05	1e-05	1e-05	6	172
Ames_21644	No	Mexico	TWW 165	Cucurbita pepo	Two pollinations split into 2 seed lots probably based on fruit type.	NA	Cultivated material	South/Latin America	1e-05	0.554338	1e-05	0.251516	0.01119	0.028325	0.033705	0.071947	0.003241	0.045717	6	174
PI_442311	No	Mexico	Calabaza de India	Cucurbita pepo	Fruits light green-mottled, creamy white at maturity, oval, 30cm long, 17cm diam.	NA	Landrace	South/Latin America	0.015749	0.925948	1e-05	0.043644	1e-05	1e-05	1e-05	1e-05	0.014599	1e-05	6	101
PI_318826	No	Mexico	22068	Cucurbita pepo	Cultivated by the Tarahumara Indians.	NA	Landrace	South/Latin America	0.35565	0.64427	1e-05	1e-05	1e-05	1e-05	1e-05	1e-05	1e-05	1e-05	6	77
PI_438717	No	Mexico	Huiche	Cucurbita pepo	Seeds long, slender, tan. Received as Cucuribta mixta.	NA	Landrace	South/Latin America	1e-05	0.904781	1e-05	0.00807	1e-05	0.000533	0.017726	1e-05	1e-05	0.06884	6	118
PI_438700	No	Mexico	WC 2122	Cucurbita pepo	Received as Cucurbita mixta.	NA	Landrace	South/Latin America	1e-05	0.41093	0.226258	1e-05	1e-05	0.362742	1e-05	1e-05	1e-05	1e-05	6	171
PI_442316	No	Mexico	Calabaza de India	Cucurbita pepo	Fruits dark green, some mottling, cylindrical, 24cm long, 15cm diam.	NA	Landrace	South/Latin America	1e-05	0.74467	1e-05	0.132249	1e-05	0.060765	0.037128	1e-05	0.025139	1e-05	6	149
PI_442260	No	Mexico	Calabaza de Castilla	Cucurbita pepo	Fruits dark green, tan to maturity, inverted bell-shape, 30cm long, 23cm diam. Rind 1 mm thick. Flesh lemon yellow. Received as C. moschata.	NA	Landrace	South/Latin America	1e-05	0.944188	1e-05	0.028372	1e-05	1e-05	0.02737	1e-05	1e-05	1e-05	6	96
PI_442291	No	Mexico	Calabaza	Cucurbita pepo	NA	NA	Landrace	South/Latin America	1e-05	0.727932	0.019747	0.126788	0.037155	0.072024	0.001222	1e-05	1e-05	0.015102	6	148
PI_438822	No	Mexico	Calabasa Chica	Cucurbita pepo	NA	NA	Landrace	South/Latin America	1e-05	0.917388	1e-05	0.060953	1e-05	1e-05	0.021589	1e-05	1e-05	1e-05	6	138
PI_442293	No	Mexico	Calabasa de India	Cucurbita pepo	Fruits green, light green spotted, cylindrical, 26cm long, 19cm diam. Rind 1 mm thick. Flesh yellowish-white.	NA	Landrace	South/Latin America	1e-05	0.903846	0.025964	0.069419	0.000711	1e-05	1e-05	1e-05	1e-05	1e-05	6	133
PI_442294	No	Mexico	Calabasa de India	Cucurbita pepo	Fruits dark green, light green stripes, cylindrical, 26cm long, 13cm diam.	NA	Landrace	South/Latin America	0.00784	0.693736	0.031182	0.14836	1e-05	0.101202	1e-05	1e-05	0.017639	1e-05	6	147
PI_442295	No	Mexico	Calabaza de India	Cucurbita pepo	Fruits green, light green mottled, round-flattened shape, 12cm long, 19cm diam. Rind 2mm thick. Flesh lemon yellow.	NA	Landrace	South/Latin America	1e-05	0.970746	1e-05	0.029174	1e-05	1e-05	1e-05	1e-05	1e-05	1e-05	6	92
PI_442296	No	Mexico	Calabaza de India	Cucurbita pepo	Fruits light green, white spots, yellow at maturity, round-cylindrical, 18cm long, 13cm diam. Rind 2mm thick. Flesh lemon yellow.	NA	Landrace	South/Latin America	1e-05	0.894581	0.012407	0.092942	1e-05	1e-05	1e-05	1e-05	1e-05	1e-05	6	126
PI_197671	No	Mexico	Ovifera-type	Cucurbita pepo	A climbing vine; fruits varying from globose to ellipsoid, streaked green and yellow, 7.5 cm in diameter. Received as Cucurbita pepo var. ovifera.	NA	Wild material	South/Latin America	1e-05	0.441398	0.408616	1e-05	0.043484	0.106442	1e-05	1e-05	1e-05	1e-05	6	169
PI_442298	No	Mexico	Calabaza de India	Cucurbita pepo	Fruits solid white, round-flattened, 16cm long, 20cm diam. Flesh lemon yellow. Center hollow, triangular. Seeds frequently sterile or germinating prematurely.	NA	Landrace	South/Latin America	0.004622	0.995298	1e-05	1e-05	1e-05	1e-05	1e-05	1e-05	1e-05	1e-05	6	83
PI_442299	No	Mexico	Calabaza de India	Cucurbita pepo	Fruits yellowish, dark green stripes, turban-shaped, 20cm long, 17cm diam. Rind 4mm thick. Flesh orange-yellow. Strong pumpkin odor.	NA	Landrace	South/Latin America	1e-05	0.946266	0.005672	0.019006	1e-05	0.011179	1e-05	1e-05	0.017827	1e-05	6	90
PI_442300	No	Mexico	Calabaza de India	Cucurbita pepo	Fruits light green, dark green stripes, lemon yellow at maturity, round-elongate, 19cm long, 8cm diam. Rind 4mm thick. Flesh lemon yellow. Unpleasant aroma.	NA	Landrace	South/Latin America	1e-05	0.916803	0.024099	0.031329	1e-05	1e-05	0.027709	1e-05	1e-05	1e-05	6	97
PI_442304	No	Mexico	Calabaza de India	Cucurbita pepo	Fruits light green, orange at maturity, almost round, 14cm long, 20cm diam. Rind 1.5mm thick. Flesh lemon yellow.	NA	Landrace	South/Latin America	1e-05	0.916564	1e-05	0.054528	1e-05	1e-05	0.028839	1e-05	1e-05	1e-05	6	139
PI_442305	No	Mexico	Calabaza de India	Cucurbita pepo	Fruits white, round, 13cm long, 10cm diam. Rind 2mm thick. Flesh greenish-white.	NA	Landrace	South/Latin America	1e-05	0.892281	1e-05	0.107639	1e-05	1e-05	1e-05	1e-05	1e-05	1e-05	6	123
PI_442306	No	Mexico	Calabaza de India	Cucurbita pepo	Fruits smooth, greenish, dark green stripes, yellow at maturity, round-oblong, 19cm long, 17cm diam. Rind 2mm. Placenta solid. Flesh orange-yellow.	NA	Landrace	South/Latin America	0.021598	0.852702	1e-05	0.065702	1e-05	0.05185	0.008098	1e-05	1e-05	1e-05	6	117
PI_442307	No	Mexico	Calabaza de India	Cucurbita pepo	Vine. Fruits dark green, probably immature, cylindrical, 19cm long, 16cm diam. Rind 3cm thick. Placenta solid. Flesh lemon-yellow. Seeds immature.	NA	Landrace	South/Latin America	1e-05	0.856089	1e-05	0.09224	0.014681	0.002158	1e-05	0.034782	1e-05	1e-05	6	121
PI_442308	No	Mexico	Calabaza de India	Cucurbita pepo	Fruits green, white spotting, white at maturity, cylindrical, 16cm long, 14cm diam.	NA	Landrace	South/Latin America	1e-05	0.909161	1e-05	0.068636	1e-05	1e-05	0.022133	1e-05	1e-05	1e-05	6	137
PI_442309	No	Mexico	Calabaza de India	Cucurbita pepo	Fruits light green on white background, cylindrical, 15cm long, 14cm diam.	NA	Landrace	South/Latin America	1e-05	0.92837	1e-05	0.053026	1e-05	1e-05	1e-05	1e-05	0.018534	1e-05	6	102
PI_442310	No	Mexico	Calabaza de India	Cucurbita pepo	Fruits light green-mottled, white at maturity, cylindrical, 19cm long, 16cm diam.	NA	Landrace	South/Latin America	1e-05	0.961735	1e-05	0.014218	1e-05	1e-05	1e-05	0.023977	1e-05	1e-05	6	91
PI_532389	No	Mexico	Calabasa Tutume	Cucurbita pepo	Fruits fairly uniform, elongated obovate, 24cm long, 16cm in diameter, orange when mature, smooth, some with very slight ribs. Flesh pale yellow, 3-3.5cm thick. Eaten primarily when thick.	NA	Landrace	South/Latin America	1e-05	1e-05	1e-05	1e-05	1e-05	0.99991	1e-05	1e-05	1e-05	1e-05	10	5
PI_442339	No	Mexico	K792-266	Cucurbita pepo	NA	NA	Landrace	South/Latin America	1e-05	0.890499	1e-05	0.109421	1e-05	1e-05	1e-05	1e-05	1e-05	1e-05	6	124
PI_442314	No	Mexico	Calabaza de India	Cucurbita pepo	Fruits light green, white spots, short, cylindrical, 17cm long, 16cm diam.	NA	Landrace	South/Latin America	1e-05	0.743437	0.005228	0.080522	0.024427	0.146335	1e-05	1e-05	1e-05	1e-05	6	146
Ames_21651	No	Mexico	TWW 157	Cucurbita pepo	One pollination split into 2 seed lots.	NA	Cultivated material	South/Latin America	1e-05	0.98408	1e-05	1e-05	1e-05	1e-05	1e-05	1e-05	0.01584	1e-05	6	81
PI_438711	No	Mexico	WC 2300	Cucurbita pepo	Received as Cucurbita mixta.	NA	Landrace	South/Latin America	1e-05	0.410405	1e-05	0.123794	1e-05	0.228412	0.005795	0.060607	1e-05	0.170946	6	173
PI_442317	No	Mexico	Calabaza de India	Cucurbita pepo	Fruits light green, white mottling, pyriform, 17cm long, 17cm diam.	NA	Landrace	South/Latin America	1e-05	0.88956	0.007604	0.092345	0.01043	1e-05	1e-05	1e-05	1e-05	1e-05	6	127
PI_442318	No	Mexico	Calabaza de India	Cucurbita pepo	Fruits green, some mottling, round, 13cm long, 13cm diam.	NA	Landrace	South/Latin America	1e-05	0.920918	0.018293	0.006463	0.030351	1e-05	1e-05	0.001813	1e-05	0.022122	6	88
PI_442319	No	Mexico	Calabaza de India	Cucurbita pepo	Fruits green, mottled, cylindrical, 23cm long, 16cm diam.	NA	Landrace	South/Latin America	0.030889	0.860025	1e-05	0.073909	0.000751	1e-05	0.034376	1e-05	1e-05	1e-05	6	129
PI_442320	No	Mexico	Calabaza de India	Cucurbita pepo	Fruits white, green stripes, pyriform-cylindrical, 19cm long, 11cm diam.	NA	Landrace	South/Latin America	0.002569	0.912162	1e-05	0.072735	1e-05	1e-05	0.006849	0.005635	1e-05	1e-05	6	142
PI_442321	No	Mexico	Calabaza de Manteca	Cucurbita pepo	Fruits light green, white spots, 17cm long, 13cm diam.	NA	Landrace	South/Latin America	0.03185	0.705293	1e-05	0.072751	1e-05	0.05453	0.03962	0.046727	1e-05	0.0492	6	145
PI_442322	No	Mexico	Calabaza de Manteca	Cucurbita pepo	Fruits light green, white spots, oval, 18cm long, 14cm diam.	NA	Landrace	South/Latin America	0.027718	0.734792	1e-05	0.090424	1e-05	0.033336	1e-05	0.11368	1e-05	1e-05	6	158
PI_442325	No	Mexico	Calabaza de Manteca	Cucurbita pepo	Fruits light green, lighter green mottling, cylindrical, 25cm long, 12cm diam.	NA	Landrace	South/Latin America	0.028208	0.585828	0.009559	0.167585	0.008036	0.091912	0.015062	0.072374	0.021424	1e-05	6	175
PI_612862	No	Mexico	20-3	Cucurbita pepo	Obloid, slightly ribbed, dark green, hard rind, 12.5 cm long, 15 cm wide, flesh unusually deep orange and thick.	NA	Cultivated material	South/Latin America	0.058036	0.787953	0.029315	0.093558	1e-05	1e-05	1e-05	0.012797	0.018302	1e-05	6	154
PI_612863	No	Mexico	20-4	Cucurbita pepo	Obloid and ribbed, green reticulated and spotchy, 13.5 cm long, 20 cm wide, rind hard, flesh pale orange.	NA	Cultivated material	South/Latin America	0.013377	0.785399	0.009531	0.063861	1e-05	1e-05	0.052592	0.0752	1e-05	1e-05	6	156
PI_615120	No	Mexico	Guiches (Guichayota)	Cucurbita pepo	Single fruit collection with 5381 (C. moschata); farily typical pepo.	NA	Landrace	South/Latin America	1e-05	0.807335	0.012897	0.054853	1e-05	0.090051	1e-05	1e-05	0.005451	0.029374	6	114
PI_511977	No	Mexico	Calabaza	Cucurbita pepo	Sown in June, harvested September/October. Fruit cooked as a sweet, seeds roasted or ground for sauces.	NA	Landrace	South/Latin America	0.010275	0.988217	0.001438	1e-05	1e-05	1e-05	1e-05	1e-05	1e-05	1e-05	6	82
PI_511978	No	Mexico	Calabaza	Cucurbita pepo	Sown in May, harvested in October. Cook mature flesh, toast or grind seeds for sauces.	NA	Landrace	South/Latin America	0.001546	0.896372	1e-05	0.048027	0.03296	0.016043	0.005013	1e-05	1e-05	1e-05	6	132
PI_615123	No	Mexico	Huitzayota	Cucurbita pepo	Mixed sample (seed from several fruit).	NA	Landrace	South/Latin America	1e-05	0.825895	1e-05	0.035326	0.01321	0.068866	0.007816	0.048847	1e-05	1e-05	6	113
PI_438716	No	Mexico	Huiche	Cucurbita pepo	Fruit obovate, slightly ribbed, mottled light and dark green. Peduncle not flared. Seeds slender, to 3cm long, tan. Received as Cucurbita mixta.	NA	Landrace	South/Latin America	1e-05	0.924443	1e-05	0.030047	1e-05	1e-05	1e-05	1e-05	0.04544	1e-05	6	130
PI_511981	No	Mexico	Calabaza	Cucurbita pepo	Sown in May, harvested in October/November. Prepare sweets from flesh, toast or grind seeds.	NA	Landrace	South/Latin America	1e-05	0.954199	1e-05	0.045721	1e-05	1e-05	1e-05	1e-05	1e-05	1e-05	6	100
PI_511982	No	Mexico	Calabaza	Cucurbita pepo	Sown in May/June, harvested in October/November. Cook mature flesh, toast or grind seeds.	NA	Landrace	South/Latin America	1e-05	0.99991	1e-05	1e-05	1e-05	1e-05	1e-05	1e-05	1e-05	1e-05	6	85
PI_438823	No	Mexico	Grandota Criolla	Cucurbita pepo	NA	NA	Landrace	South/Latin America	1e-05	0.842475	0.022633	0.07551	1e-05	1e-05	1e-05	0.041047	0.018286	1e-05	6	120
PI_512185	No	Mexico	Calabaza india	Cucurbita pepo	Single fruit, green-grey with pronounced ribs.	NA	Cultivated material	South/Latin America	1e-05	0.90899	0.005847	0.061942	0.014184	1e-05	0.008988	1e-05	1e-05	1e-05	6	136
PI_512186	No	Mexico	Calabaza india	Cucurbita pepo	Single fruit, green-grey with pronounced ribs.	NA	Cultivated material	South/Latin America	1e-05	0.89484	1e-05	0.094907	1e-05	1e-05	0.010183	1e-05	1e-05	1e-05	6	125
PI_442292	No	Mexico	Calabaza de India	Cucurbita pepo	Primitive plant.	NA	Landrace	South/Latin America	0.041494	0.799176	1e-05	0.145655	1e-05	0.012971	1e-05	0.000654	1e-05	1e-05	6	155
PI_615118	No	Mexico	GN 84-84	Cucurbita pepo	NA	NA	Cultivated material	South/Latin America	1e-05	0.942577	1e-05	1e-05	0.02573	1e-05	1e-05	1e-05	0.031622	1e-05	6	87
PI_512190	No	Mexico	Calabaza india	Cucurbita pepo	Single fruit long, large curved and ribbed.	NA	Cultivated material	South/Latin America	1e-05	0.926897	0.015378	0.057655	1e-05	1e-05	1e-05	1e-05	1e-05	1e-05	6	134
PI_615132	No	Mexico	P 5444	Cucurbita pepo	Only two fruits available, others (larger) were retained as source of seed for next year's planting.	NA	Uncertain improvement status	South/Latin America	1e-05	0.777324	0.035503	1e-05	1e-05	0.1799	0.007212	1e-05	1e-05	1e-05	6	160
PI_615121	No	Mexico	Guiches (Guichayota)	Cucurbita pepo	Single fruit collection from second stop in town with 5384 and 5386.	NA	Landrace	South/Latin America	0.003612	0.766612	1e-05	0.054373	1e-05	0.071	0.02297	0.081393	1e-05	1e-05	6	157
PI_615122	No	Mexico	Guiches (Guichayota)	Cucurbita pepo	Single fruit collection from second stop in town with 5384 and 5385.	NA	Landrace	South/Latin America	1e-05	0.827695	1e-05	0.067244	1e-05	0.070517	1e-05	1e-05	0.034484	1e-05	6	116
PI_442315	No	Mexico	Calabaza de India	Cucurbita pepo	Fruits light green, mottled, cylindrical, 17cm long, 17cm diam.	NA	Landrace	South/Latin America	0.009153	0.871518	1e-05	0.104955	1e-05	1e-05	1e-05	1e-05	0.014314	1e-05	6	122
PI_615124	No	Mexico	Huitzayota	Cucurbita pepo	Single fruit sample.	NA	Landrace	South/Latin America	1e-05	0.807313	1e-05	0.081527	1e-05	0.108218	0.002882	1e-05	1e-05	1e-05	6	115
PI_615125	No	Mexico	Huitzayota	Cucurbita pepo	Single fruit sample.	NA	Landrace	South/Latin America	1.4e-05	0.835349	1e-05	0.018955	1e-05	0.082124	1e-05	0.016643	1e-05	0.046874	6	112
PI_615126	No	Mexico	P 5399	Cucurbita pepo	Collection of 3 fruits from lady; she selects next year's seed from largest fruits (did not want to sell largest).	NA	Uncertain improvement status	South/Latin America	1e-05	0.850316	1e-05	1e-05	1e-05	0.147054	1e-05	0.00256	1e-05	1e-05	6	104
PI_615127	No	Mexico	Tzolito	Cucurbita pepo	Series of 7 fruits taken from farm; small, multi-colored, a typical pepo; sown in March, harvested June.	NA	Landrace	South/Latin America	1e-05	0.736111	0.032836	1e-05	1e-05	0.230983	1e-05	1e-05	1e-05	1e-05	6	163
PI_615128	No	Mexico	Tzul	Cucurbita pepo	Two fruits, large, green-mottled; sown in March, harevested June/July; use flesh with sugar.	NA	Landrace	South/Latin America	1e-05	0.778526	1e-05	1e-05	1e-05	0.221394	1e-05	1e-05	1e-05	1e-05	6	166
PI_532354	No	Mexico	Calabacilla loca	Cucurbita pepo subsp. fraterna	Fruits 5, obloid to spheroid, 4.5-6.5cm in diameter, 2 still green with lighter green stripes and flecking, fading to orange. Rind smooth, moderately soft, 1 mm thick. Flesh extremely bitter. Seeds 7-9mm long, 4-6mm wide.	NA	Wild material	South/Latin America	1e-05	1e-05	0.296896	1e-05	1e-05	0.703024	1e-05	1e-05	1e-05	1e-05	10	1
PI_532355	No	Mexico	179	Cucurbita pepo subsp. fraterna	Fruits 8, obloid to spheroid, from green with lighter green stripes and flecking to almost completely bright orange with stripes 3.5-4.5cm diameter. Flesh extremely bitter. Rind smooth and moderately soft, 1 mm thick.	NA	Wild material	South/Latin America	1e-05	1e-05	0.338325	1e-05	1e-05	0.661595	1e-05	1e-05	1e-05	1e-05	10	3
PI_532356	No	Mexico	180	Cucurbita pepo subsp. fraterna	Fruit found 1 km E of PI 532355, single fruit larger with thicker rind, obovoid, faded yellow, 7cm long, 6cm wide. Rind 2mm thick.	NA	Wild material	South/Latin America	1e-05	1e-05	0.329662	1e-05	1e-05	0.670258	1e-05	1e-05	1e-05	1e-05	10	2
PI_532385	No	Mexico	Calabaza	Cucurbita pepo	Ellipsoid, obloid, to oblong, ribbed, finely green reticulated 7.5 to 19.5 cm long, 11.5-20 cm wide. Rind usually hard. Flesh orange.	NA	Landrace	South/Latin America	0.083058	0.706262	0.008541	0.126657	1e-05	1e-05	1e-05	1e-05	1e-05	0.075431	6	152
PI_511973	No	Mexico	Imai (Tepehuan)	Cucurbita pepo	Sown in June, harvested October/November.	NA	Landrace	South/Latin America	1e-05	0.99991	1e-05	1e-05	1e-05	1e-05	1e-05	1e-05	1e-05	1e-05	6	84
PI_511974	No	Mexico	Imai (Tepehuan)	Cucurbita pepo	Sown June, harvested September/October. Eat flowers, grind seeds for sauces, eat mature flesh cooked with raw sugar and milk.	NA	Landrace	South/Latin America	1e-05	0.961364	1e-05	0.038556	1e-05	1e-05	1e-05	1e-05	1e-05	1e-05	6	95
PI_612864	No	Mexico	20-5	Cucurbita pepo	Oblong, ribbed, dark green, 15.5 cm long, 15 cm wide, flesh orange.	NA	Cultivated material	South/Latin America	0.030576	0.685249	0.00212	0.137743	1e-05	0.024209	1e-05	0.013867	1e-05	0.106206	6	151
PI_612865	No	Mexico	20-6	Cucurbita pepo	Oblong, no ribs, dark green with lighter green speckles, 18.5 cm long, 14 cm wide, flesh thick pale orange.	NA	Cultivated material	South/Latin America	1e-05	0.830748	1e-05	0.062669	1e-05	1e-05	0.007372	1e-05	0.016403	0.082758	6	119
PI_612866	No	Mexico	20-7	Cucurbita pepo	Ellipsoid, very slightly ribbed, dark green with lighter green stripes along ribs and flecked between ribs, 18 cm long, 11.5 cm wide, very pale orange flesh.	NA	Cultivated material	South/Latin America	0.044413	0.745735	1e-05	0.114752	1e-05	1e-05	0.000225	0.038009	0.024996	0.031839	6	153
PI_612867	No	Mexico	20-8	Cucurbita pepo	Oblong, ribbed, uniformly finely green reticulated, 19.5 cm long, 13.5 cm wide, pale orange flesh.	NA	Cultivated material	South/Latin America	0.088866	0.690307	1e-05	0.133236	1e-05	0.003433	0.002728	0.078886	1e-05	0.002513	6	150
PI_614683	No	Mexico	HDW 5531	Cucurbita pepo subsp. fraterna	All fruits green and white striped maturing to orange; bitter.	NA	Wild material	South/Latin America	1e-05	1e-05	0.097696	1e-05	1e-05	0.902224	1e-05	1e-05	1e-05	1e-05	10	4
PI_318830	No	Mexico	Calabasa	Cucurbita pepo	Used as summer squash when young and tender. Resembles zucchini.	NA	Landrace	South/Latin America	1e-05	0.889043	0.000593	0.023562	0.008768	1e-05	0.007437	1e-05	0.070556	1e-05	6	131
PI_511983	No	Mexico	Calabaza de la Sierra	Cucurbita pepo	Sown in May/June, harvested in October/November. Use cooked flesh in baked sweets, toast or grind seeds.	NA	Landrace	South/Latin America	1e-05	0.99991	1e-05	1e-05	1e-05	1e-05	1e-05	1e-05	1e-05	1e-05	6	86
PI_511967	No	Mexico	Calabaza	Cucurbita pepo	Fruit green, roundish, blocky with distinct ridges. Sown June, harvested September. Cook mature flesh, toast or grind seeds to eat.	NA	Landrace	South/Latin America	0.03589	0.944785	1e-05	0.019255	1e-05	1e-05	1e-05	1e-05	1e-05	1e-05	6	89
PI_511968	No	Mexico	Calabaza	Cucurbita pepo	Sown June, harvested September/October. Cook mature flesh, grind or toast seeds.	NA	Landrace	South/Latin America	1e-05	0.971105	1e-05	0.028815	1e-05	1e-05	1e-05	1e-05	1e-05	1e-05	6	93
Ames_7770	No	Mexico	Calabasa de Agua y Arrota	Cucurbita pepo	NA	NA	Cultivated material	South/Latin America	1e-05	0.038589	0.018431	0.057604	1e-05	0.024591	0.024124	0.050618	1e-05	0.786012	1	582
PI_615131	No	Mexico	Tzol	Cucurbita pepo	Sample taken from seed set aside to plant in 1985; old seed, but a mass sample.	NA	Landrace	South/Latin America	1e-05	0.768196	0.012502	1e-05	1e-05	0.219232	1e-05	1e-05	1e-05	1e-05	6	167
PI_512192	No	Mexico	Calabaza	Cucurbita pepo	Two fruits round shape, without typical (C. pepo) angular peduncle and lack of ridges on fruit.	NA	Cultivated material	South/Latin America	1e-05	0.904862	0.001925	0.073075	1e-05	1e-05	1e-05	0.020078	1e-05	1e-05	6	140
PI_442335	No	Mexico	Calabaza	Cucurbita pepo	Fruits with light green mottling, cream at maturity, oblong-cylindrical, 22cm long, 16cm diam.	NA	Landrace	South/Latin America	1e-05	0.921853	0.027001	0.044623	0.006462	1e-05	1e-05	1e-05	1e-05	1e-05	6	135
PI_615129	No	Mexico	Tzol	Cucurbita pepo	Three fruits from grower; they select seed for sowing from the larger fruit of the harvest. Sown in April, harvested June/July.	NA	Landrace	South/Latin America	1e-05	0.764474	0.006576	1e-05	1e-05	0.22888	1e-05	1e-05	1e-05	1e-05	6	168
PI_442297	No	Mexico	Calabaza de India	Cucurbita pepo	Fruits cream-white, mottled dark green stripes, round, 20cm long, 19cm diam. Rind 2mm thick. Locules separate. Flesh lemon yellow.	NA	Landrace	South/Latin America	0.001258	0.981421	1e-05	0.017251	1e-05	1e-05	1e-05	1e-05	1e-05	1e-05	6	78
PI_512188	No	Mexico	Calabaza india; Calabaza gavilan	Cucurbita pepo	Single fruit, grey-green with pronounced ribs.	NA	Cultivated material	South/Latin America	1e-05	0.880143	1e-05	0.063614	0.014148	1e-05	0.042035	1e-05	1e-05	1e-05	6	128
PI_442331	No	Mexico	Calabaza de Castilla	Cucurbita pepo	Fruits green, light green stripes, oblong-cylindrical, 18cm long, 15cm diam.	NA	Landrace	South/Latin America	1e-05	0.942361	1e-05	0.057559	1e-05	1e-05	1e-05	1e-05	1e-05	1e-05	6	99
PI_512189	No	Mexico	Calabaza india	Cucurbita pepo	Single fruit green, ribbed with mottled stripes. Fruit flesh and seed eaten by humans and fed to animals.	NA	Cultivated material	South/Latin America	1e-05	0.986211	1e-05	0.013709	1e-05	1e-05	1e-05	1e-05	1e-05	1e-05	6	79
Ames_21650	No	Mexico	TWW 163	Cucurbita pepo	One pollination split into 2 seed lots.	NA	Cultivated material	South/Latin America	0.06015	0.68973	1e-05	0.039551	1e-05	0.129557	1e-05	1e-05	0.023415	0.057557	6	144
PI_615130	No	Mexico	Tzolito	Cucurbita pepo	Five fruits. Used only for seeds (roasted or ground for "pipian"), sown in February with harvest in July/August.	NA	Landrace	South/Latin America	1e-05	0.761471	0.025691	1e-05	1e-05	0.212768	1e-05	1e-05	1e-05	1e-05	6	165
Ames_21645	No	Brazil	TWW 153	Cucurbita pepo	One pollination split into 2 seed lots.	NA	Cultivated material	South/Latin America	0.266851	0.060808	1e-05	1e-05	1e-05	0.202127	1e-05	0.063584	0.406581	1e-05	1	721
Ames_21649	No	Brazil	TWW 152	Cucurbita pepo	One pollination split into 2 seed lots.	NA	Cultivated material	South/Latin America	0.300402	0.084329	1e-05	1e-05	1e-05	0.201742	1e-05	0.032798	0.38068	1e-05	1	722
Ames_21653	No	Argentina	TWW 148	Cucurbita pepo	Large, late plants; split into 3 seed lots (=1 fruit self, 5 fruits sibbed, 3 fruit sibbed).	NA	Cultivated material	South/Latin America	1e-05	0.154345	0.012334	0.538315	1e-05	0.001357	0.025488	0.132668	0.002174	0.133299	9	24
PI_234252	No	Argentina	G56-31B	Cucurbita pepo	NA	NA	Uncertain improvement status	South/Latin America	0.163235	0.166175	0.001263	0.029886	1e-05	0.19153	0.01653	0.189729	0.182043	0.059599	1	727
PI_458730	No	Argentina	Zapallito Italiano (Tupungato magnif.)	Cucurbita pepo	Seeds medium-sized, dirty white, margins same color. Local name Zapallito Italiano (Tupungato magnif.).	NA	Landrace	South/Latin America	0.412023	0.076062	1e-05	0.048894	1e-05	0.124909	1e-05	0.128626	0.193204	0.016253	1	730
Ames_24950	No	Uruguay	G 24401	Cucurbita pepo	NA	NA	Cultivated material	South/Latin America	0.004745	0.327679	1e-05	0.424337	1e-05	1e-05	1e-05	0.238209	0.004979	1e-05	9	28
PI_512800	No	Spain	S-CU-2	Cucurbita pepo	Sown February-March, harvested September-October. Used for livestock feed.	NA	Landrace	Europe	1e-05	1e-05	1e-05	0.99991	1e-05	1e-05	1e-05	1e-05	1e-05	1e-05	9	8
PI_261610	No	Spain	Calabacin	Cucurbita pepo	Eight inches long.	NA	Uncertain improvement status	Europe	0.047584	0.086803	0.003013	0.54507	0.035096	0.135291	0.013284	0.039362	1e-05	0.094487	9	43
PI_615139	No	Spain	Calabacin largo	Cucurbita pepo	Sown February, harvested September-November. Used as food.	NA	Landrace	Europe	0.309997	0.022824	1e-05	1e-05	1e-05	0.198627	1e-05	1e-05	0.468492	1e-05	1	720
PI_615135	No	Spain	Calabacino	Cucurbita pepo	NA	NA	Landrace	Europe	0.13752	0.177229	1e-05	0.297535	0.034337	0.025025	0.001387	0.154314	0.087971	0.084671	1	696
PI_512802	No	Spain	S-CU-4	Cucurbita pepo	Sown February, harvested September. Used for livestock feed.	NA	Landrace	Europe	1e-05	1e-05	1e-05	0.99991	1e-05	1e-05	1e-05	1e-05	1e-05	1e-05	9	10
PI_512703	No	Spain	A-CU-12	Cucurbita pepo	Sown April, harvested August-September. Used fried or cooked.	NA	Landrace	Europe	0.181888	0.066534	1e-05	0.274502	1e-05	0.190762	1e-05	1e-05	0.286264	1e-05	1	701
PI_512709	No	Spain	A-CU-19	Cucurbita pepo	Sown May, harvested August. Fruit yellow, large. Used for local consumption.	NA	Landrace	Europe	0.065871	0.066606	1e-05	0.580262	1e-05	0.08006	1e-05	1e-05	4.7e-05	0.207114	9	33
PI_512710	No	Spain	AN-CU-1	Cucurbita pepo	Sown March, transplanted May. Harvested in July-August. Used for self-consumption.	NA	Landrace	Europe	0.235352	0.087462	1e-05	0.109696	1e-05	0.151235	1e-05	0.290968	0.115876	0.00938	1	729
PI_512729	No	Spain	AN-CU-25	Cucurbita pepo	Sown February, harvested July.	NA	Landrace	Europe	0.05078	0.106285	0.044067	0.267756	1e-05	0.3439	1e-05	0.024229	0.039816	0.123148	1	694
PI_512739	No	Spain	AN-CU-36	Cucurbita pepo	Sown May-June, harvested September-October. Used cooked and for stew.	NA	Landrace	Europe	0.044975	0.094216	1e-05	0.606014	0.013036	0.094293	1e-05	1e-05	0.083589	0.063847	9	29
PI_512785	No	Spain	CM-CU-7	Cucurbita pepo	Sown May, harvested August.	NA	Landrace	Europe	0.386627	1e-05	1e-05	0.045847	1e-05	0.209269	1e-05	1e-05	0.358197	1e-05	1	725
PI_512752	No	Spain	AS-CU-4	Cucurbita pepo	Sown February, harvested September. Used for black pudding and livestock feed.	NA	Landrace	Europe	1e-05	1e-05	1e-05	0.99991	1e-05	1e-05	1e-05	1e-05	1e-05	1e-05	9	14
PI_615138	No	Spain	Calabacin	Cucurbita pepo	Sown April-May, harvested August-September. Fruits white, small, very soft. Used for food.	NA	Landrace	Europe	1e-05	0.200951	0.027723	0.469239	1e-05	0.140845	1e-05	1e-05	0.05505	0.106152	9	40
PI_512754	No	Spain	AS-CU-6	Cucurbita pepo	Sown February-March, harvested September. Used for black pudding and livestock feed.	NA	Landrace	Europe	1e-05	1e-05	1e-05	0.99991	1e-05	1e-05	1e-05	1e-05	1e-05	1e-05	9	15
PI_257287	No	Spain	Green Marrow	Cucurbita pepo	Received s Cucurbita maxima, re-ID per QS22 12/65 to C. pepo, squash.	NA	Uncertain improvement status	Europe	0.026093	0.152031	1e-05	0.495174	0.01016	0.076824	1e-05	1e-05	0.067924	0.171765	9	37
PI_512862	No	Spain	V-CU-85	Cucurbita pepo	Sown April, harvested August-September. Used for decorating.	NA	Landrace	Europe	0.106791	0.07133	0.375387	0.078929	1e-05	0.166217	1e-05	0.127924	1e-05	0.073391	2	474
PI_512755	No	Spain	AS-CU-7	Cucurbita pepo	Sown February-March, harvested September-October. Used for cooking and livestock feed.	NA	Landrace	Europe	1e-05	1e-05	1e-05	0.99991	1e-05	1e-05	1e-05	1e-05	1e-05	1e-05	9	16
PI_512782	No	Spain	CM-CU-4	Cucurbita pepo	Sown beginning May, harvested July-August.	NA	Landrace	Europe	0.275434	0.054866	1e-05	0.08416	1e-05	0.220784	1e-05	1e-05	0.364707	1e-05	1	723
PI_512806	No	Spain	V-CU-4	Cucurbita pepo	Sown March-April, harvested October-November. Used for decorating.	NA	Landrace	Europe	0.166453	0.095186	0.027365	0.198137	1e-05	0.335012	1e-05	1e-05	0.105905	0.071911	1	698
PI_512751	No	Spain	AS-CU-3	Cucurbita pepo	Sown February, harvested September. Used for black pudding and livestock feed.	NA	Landrace	Europe	1e-05	1e-05	1e-05	0.99991	1e-05	1e-05	1e-05	1e-05	1e-05	1e-05	9	17
PI_512789	No	Spain	E-CU-5	Cucurbita pepo	Sown March, harvested September.	NA	Landrace	Europe	1e-05	0.146524	0.017994	0.182182	0.010279	0.417668	0.026246	0.163807	0.035281	1e-05	1	693
PI_512793	No	Spain	E-CU-9	Cucurbita pepo	Sown April, harvested August. Used for stew.	NA	Landrace	Europe	0.353084	0.06019	1e-05	1e-05	1e-05	0.219926	1e-05	1e-05	0.36674	1e-05	1	724
PI_512794	No	Spain	E-CU-10	Cucurbita pepo	Sown April, harvested August. Used for stew.	NA	Landrace	Europe	0.098942	0.102096	1e-05	0.051047	0.034407	0.080441	0.004181	0.31913	0.156694	0.153052	1	688
PI_512796	No	Spain	E-CU-12	Cucurbita pepo	Sown April, harvested September. Used for stew.	NA	Landrace	Europe	0.029237	0.227675	0.060787	0.372028	1e-05	0.163889	1e-05	0.146345	1e-05	1e-05	9	27
PI_512799	No	Spain	S-CU-1	Cucurbita pepo	Sown February-March, harvested September-October. Used for stew and black pudding.	NA	Landrace	Europe	1e-05	1e-05	1e-05	0.99991	1e-05	1e-05	1e-05	1e-05	1e-05	1e-05	9	12
PI_512801	No	Spain	S-CU-3	Cucurbita pepo	Sown February, harvested September. Used for livestock feed.	NA	Landrace	Europe	1e-05	1e-05	1e-05	0.99991	1e-05	1e-05	1e-05	1e-05	1e-05	1e-05	9	9
PI_512803	No	Spain	S-CU-5	Cucurbita pepo	Sown March, harvested October. Used for animal feed.	NA	Landrace	Europe	1e-05	1e-05	1e-05	0.99991	1e-05	1e-05	1e-05	1e-05	1e-05	1e-05	9	11
PI_512804	No	Spain	V-CU-2	Cucurbita pepo	Sown March-April, harvested June.	NA	Landrace	Europe	0.020416	0.071961	1e-05	0.57409	0.002212	0.077599	1e-05	0.020788	0.08375	0.149163	9	30
PI_512880	No	Spain	V-CU-116	Cucurbita pepo	Sown May, harvested October. Used for hay.	NA	Landrace	Europe	0.019406	0.168435	0.002562	0.530266	0.06322	0.135731	1e-05	1e-05	0.028465	0.051896	9	42
PI_615134	No	Spain	Calabacino	Cucurbita pepo	Sown March, harvested May-June. Fruits elongated, whitish.	NA	Landrace	Europe	0.023032	0.238846	1e-05	0.480593	1e-05	1e-05	0.014931	0.145622	1e-05	0.096936	9	25
PI_512807	No	Spain	V-CU-5	Cucurbita pepo	Sown March, harvested August. Self-consumption.	NA	Landrace	Europe	1e-05	1e-05	1e-05	0.045815	1e-05	0.178674	0.019095	0.565765	0.110985	0.079626	4	533
PI_512810	No	Spain	V-CU-10	Cucurbita pepo	Sown March-April, harvested June-September. Self-consumption	NA	Landrace	Europe	0.053821	0.225936	1e-05	0.375283	1e-05	0.092948	1e-05	0.043783	0.081724	0.126474	9	39
PI_512812	No	Spain	V-CU-13	Cucurbita pepo	Sown March-April, harvested October-November. Used for decorating.	NA	Landrace	Europe	0.02144	0.125948	0.031897	0.545121	0.029324	0.082198	1e-05	0.087513	0.071453	0.005096	9	45
PI_512817	No	Spain	V-CU-18	Cucurbita pepo	Sown April, harvested June. Self-consumption.	NA	Landrace	Europe	0.111042	0.140344	1e-05	0.339871	0.01435	0.144132	1e-05	1e-05	0.148013	0.102218	1	700
PI_512820	No	Spain	V-CU-21	Cucurbita pepo	Sown April, harvested June-July. Self-consumption.	NA	Landrace	Europe	0.662196	1e-05	1e-05	0.029538	1e-05	0.11015	1e-05	1e-05	0.198057	1e-05	7	76
PI_512863	No	Spain	V-CU-86	Cucurbita pepo	Sown April, harvested August-September. Used for decorating.	NA	Landrace	Europe	0.098177	0.028931	0.487984	0.117654	1e-05	0.147731	0.001012	0.10911	1e-05	0.009381	2	481
PI_512741	No	Spain	AN-CU-38	Cucurbita pepo	Sown May-June, harvested September-October. Used cooked and for stew.	NA	Landrace	Europe	0.067785	0.115732	1e-05	0.597901	1e-05	0.036476	1e-05	1e-05	0.010964	0.171102	9	32
PI_512744	No	Spain	AN-CU-42	Cucurbita pepo	Sown April, harvested July-August.	NA	Landrace	Europe	1e-05	1e-05	0.873387	0.039539	0.013269	0.05366	1e-05	0.016934	0.003171	1e-05	2	470
PI_512805	No	Spain	V-CU-3	Cucurbita pepo	Sown March, harvested June-July. Used for cooking.	NA	Landrace	Europe	0.173543	0.112655	1e-05	0.288633	1e-05	0.170816	1e-05	0.03038	0.159243	0.064702	1	699
PI_512750	No	Spain	AS-CU-2	Cucurbita pepo	Sown February, harvested September. Used for cooking.	NA	Landrace	Europe	1e-05	1e-05	1e-05	0.99991	1e-05	1e-05	1e-05	1e-05	1e-05	1e-05	9	18
PI_512851	No	Spain	V-CU-74	Cucurbita pepo	Sown April, harvested August-September.	NA	Landrace	Europe	0.118606	0.10297	1e-05	0.251409	0.061608	0.137469	1e-05	0.136743	0.120461	0.070714	1	697
PI_512857	No	Spain	V-CU-80	Cucurbita pepo	Sown April, harvested August-September. Used for decorating.	NA	Landrace	Europe	0.01523	0.072886	0.529693	0.090897	1e-05	0.15095	0.025403	0.024682	0.049243	0.041006	2	482
PI_512858	No	Spain	V-CU-81	Cucurbita pepo	Sown April, harvested August-September. Used for decorating.	NA	Landrace	Europe	0.098035	1e-05	0.322689	0.154259	1e-05	0.203273	0.036641	0.154757	0.030316	1e-05	2	473
PI_512859	No	Spain	V-CU-82	Cucurbita pepo	Sown April, harvested August-September. Used for decorating.	NA	Landrace	Europe	0.013602	0.028763	0.513984	0.101559	1e-05	0.113298	0.02407	0.102375	0.050888	0.051451	2	483
PI_512860	No	Spain	V-CU-83	Cucurbita pepo	Sown April, harvested August-September. Used for decorating.	NA	Landrace	Europe	0.063838	0.024914	0.440004	0.085587	1e-05	0.149746	1e-05	0.208941	0.018073	0.008878	2	476
PI_512861	No	Spain	V-CU-84	Cucurbita pepo	Sown April, harvested August-September. Used for decorating.	NA	Landrace	Europe	0.095803	0.062357	0.372201	0.044613	1e-05	0.185338	1e-05	0.211744	0.027915	1e-05	2	475
PI_512757	No	Spain	C-CU-2	Cucurbita pepo	Sown March, harvested July. Self-consumption and markets.	NA	Landrace	Europe	0.91673	1e-05	1e-05	1e-05	1e-05	0.050127	1e-05	1e-05	0.033072	1e-05	7	61
PI_537504	No	Spain	Bubango	Cucurbita pepo	Sown February, harvested June. Not irrigated. Fruits elongated and rounded, variable colors. Received as Cucurbita sp.	NA	Landrace	Europe	1e-05	0.249025	1.1e-05	0.534334	1e-05	1e-05	0.013034	0.124731	1e-05	0.078825	9	22
PI_512874	No	Spain	V-CU-108	Cucurbita pepo	Sown May, harvested October. Used fried.	NA	Landrace	Europe	0.073181	0.060061	1e-05	0.580364	1e-05	0.131812	1e-05	1e-05	1e-05	0.154532	9	34
PI_512836	No	Spain	V-CU-53	Cucurbita pepo	Sown March, harvested September. Animal feed.	NA	Landrace	Europe	0.010189	0.115476	1e-05	0.579217	0.029393	0.098019	1e-05	1e-05	0.031543	0.136132	9	31
PI_512787	No	Spain	E-CU-3	Cucurbita pepo	Sown March, harvested September.	NA	Landrace	Europe	1e-05	0.173205	0.02576	0.487097	0.002348	0.18467	0.015458	0.067483	0.043959	1e-05	9	48
PI_512788	No	Spain	E-CU-4	Cucurbita pepo	Sown March, harvested September.	NA	Landrace	Europe	1e-05	0.140295	0.008278	0.478625	0.01205	0.18348	0.069393	0.067286	0.040572	1e-05	9	47
PI_537560	No	Spain	Calabaza	Cucurbita pepo	Sown May-June, harvested September. Seed used for food consumption. Received as Cucurbita sp.	NA	Landrace	Europe	1e-05	0.209348	0.025743	0.446503	4.3e-05	0.174557	0.006456	1e-05	0.024456	0.112875	9	41
PI_537562	No	Spain	N-CU-2	Cucurbita pepo	Used as adornment. Received as Cucurbita sp.	NA	Landrace	Europe	0.057355	0.039185	0.098597	0.210588	1e-05	0.249663	0.007213	0.165333	0.006472	0.165583	1	676
PI_512813	No	Spain	V-CU-14	Cucurbita pepo	Sown May, harvested August. Used for consumption.	NA	Landrace	Europe	0.023521	0.182609	0.004474	0.486151	0.003102	0.091594	1e-05	0.03976	0.014669	0.154109	9	36
PI_512753	No	Spain	AS-CU-5	Cucurbita pepo	Sown February, harvested September. Used for black pudding and livestock feed.	NA	Landrace	Europe	1e-05	1e-05	1e-05	0.99396	0.00596	1e-05	1e-05	1e-05	1e-05	1e-05	9	7
PI_537513	No	Spain	CA-CU-56	Cucurbita pepo	Fruits rounded and elongated. Received as Cucurbita sp.	NA	Landrace	Europe	0.034765	0.263396	1e-05	0.568109	1e-05	1e-05	1e-05	0.13367	1e-05	1e-05	9	21
PI_537505	No	Spain	Bubango	Cucurbita pepo	Sown March-April. Fruits white, two. Received as Cucurbita sp.	NA	Landrace	Europe	1e-05	0.236228	0.006849	0.526147	1e-05	1e-05	0.02758	0.203146	1e-05	1e-05	9	19
PI_537508	No	Spain	Bubango	Cucurbita pepo	Fruits yellow. Received as Cucurbita sp.	NA	Landrace	Europe	0.021525	0.250005	1e-05	0.563409	1e-05	1e-05	1e-05	0.116386	1e-05	0.048626	9	23
PI_512881	No	Spain	V-CU-117	Cucurbita pepo	Sown May, harvested October. Used for hay.	NA	Landrace	Europe	1e-05	0.089842	1e-05	0.557024	0.046394	0.169076	1e-05	1e-05	0.048621	0.089004	9	44
PI_537532	No	Spain	Calabaza	Cucurbita pepo	Used in cooking. Fruits elongated, yellow. Received as Cucurbita sp.	NA	Landrace	Europe	0.99991	1e-05	1e-05	1e-05	1e-05	1e-05	1e-05	1e-05	1e-05	1e-05	7	67
PI_512749	No	Spain	AS-CU-1	Cucurbita pepo	Sown February, harvested September-October. Used for cooking and making black pudding.	NA	Landrace	Europe	1e-05	1e-05	1e-05	0.99991	1e-05	1e-05	1e-05	1e-05	1e-05	1e-05	9	13
PI_512840	No	Spain	V-CU-57	Cucurbita pepo	Sown April, harvested August-September. Fruit almost round. Skin has green and yellow stripes. Used for decorations.	NA	Landrace	Europe	0.015322	0.120407	1e-05	0.359426	0.020622	0.313991	1e-05	1e-05	1e-05	0.170192	1	695
PI_537519	No	Spain	CA-CU-62	Cucurbita pepo	Received as Cucurbita sp.	NA	Uncertain improvement status	Europe	0.00482	0.252273	1e-05	0.497223	1e-05	1e-05	1e-05	0.173762	1e-05	0.071872	9	26
PI_615137	No	Spain	Calabacin	Cucurbita pepo	Sown May, harvested September. Fruits elongated, white. Used as food.	NA	Landrace	Europe	0.038184	0.191401	0.018793	0.459131	0.016731	0.121709	0.03231	0.041971	0.068362	0.011409	9	46
PI_512837	No	Spain	V-CU-54	Cucurbita pepo	Sown March, harvested September. Used for stew.	NA	Landrace	Europe	0.048883	0.1599	1e-05	0.503844	0.018316	0.104677	1e-05	1e-05	0.039595	0.124755	9	38
Ames_24951	No	Spain	C-CU-27	Cucurbita pepo	NA	NA	Cultivated material	Europe	0.185761	0.110121	1e-05	0.205479	1e-05	0.147434	0.018181	0.07682	0.218664	0.037521	1	702
PI_537514	No	Spain	Bubango	Cucurbita pepo	Fruits of two types. Received as Cucurbita sp.	NA	Landrace	Europe	0.02408	0.246229	0.004153	0.567384	1e-05	1e-05	0.006385	0.151729	1e-05	1e-05	9	20
PI_534626	No	Syria	OA 10396	Cucurbita pepo	NA	NA	Landrace	Arab States	0.04314	0.013554	0.046008	1e-05	0.505831	0.018913	0.023174	0.072785	0.023226	0.25336	3	374
PI_534572	No	Syria	OA 341	Cucurbita pepo	NA	NA	Landrace	Arab States	0.216505	1e-05	0.100835	0.026057	0.254868	1e-05	1e-05	0.252152	0.031781	0.117773	1	709
PI_534620	No	Syria	OA 10301	Cucurbita pepo	NA	NA	Landrace	Arab States	0.99991	1e-05	1e-05	1e-05	1e-05	1e-05	1e-05	1e-05	1e-05	1e-05	7	66
PI_534623	No	Syria	OA 10310	Cucurbita pepo	NA	NA	Landrace	Arab States	0.379184	1e-05	0.016657	0.027878	0.171985	0.007266	0.005433	0.349449	0.042127	1e-05	1	715
PI_534641	No	Syria	OD 10561	Cucurbita pepo	NA	NA	Landrace	Arab States	0.368593	1e-05	0.054743	1e-05	0.230907	1e-05	0.060416	0.26132	1e-05	0.023981	1	718
PI_534624	No	Syria	OA 10315	Cucurbita pepo	NA	NA	Landrace	Arab States	0.99991	1e-05	1e-05	1e-05	1e-05	1e-05	1e-05	1e-05	1e-05	1e-05	7	64
PI_534622	No	Syria	OA 10305	Cucurbita pepo	NA	NA	Landrace	Arab States	0.346353	1e-05	0.028456	0.003398	0.348956	1e-05	0.018889	0.245482	0.008436	1e-05	1	714
PI_534630	No	Syria	OD 10430	Cucurbita pepo	NA	NA	Landrace	Arab States	0.40577	0.003233	0.058217	0.021043	0.220765	1e-05	0.013117	0.275424	0.002031	0.000389	1	719
PI_534633	No	Syria	OD 10462	Cucurbita pepo	NA	NA	Landrace	Arab States	0.384645	1e-05	0.063626	0.018078	0.250018	1e-05	1e-05	0.230523	1e-05	0.05307	1	706
PI_534638	No	Syria	OD 10515	Cucurbita pepo	NA	NA	Landrace	Arab States	0.457333	1e-05	0.044666	1e-05	0.198255	1e-05	0.013702	0.155779	0.038707	0.091526	1	708
PI_534621	No	Syria	OA 10304	Cucurbita pepo	NA	NA	Landrace	Arab States	0.99991	1e-05	1e-05	1e-05	1e-05	1e-05	1e-05	1e-05	1e-05	1e-05	7	65
PI_534640	No	Syria	OD 10542	Cucurbita pepo	NA	NA	Landrace	Arab States	0.570294	1e-05	0.044549	1e-05	0.201393	1e-05	0.013884	0.166117	1e-05	0.003723	1	703
PI_534636	No	Syria	OD 10488	Cucurbita pepo	NA	NA	Landrace	Arab States	0.371123	1e-05	0.065475	1e-05	0.189594	1e-05	1e-05	0.258607	1e-05	0.115151	1	712
PI_534563	No	Syria	OA 20	Cucurbita pepo	NA	NA	Landrace	Arab States	0.99991	1e-05	1e-05	1e-05	1e-05	1e-05	1e-05	1e-05	1e-05	1e-05	7	71
PI_534562	No	Syria	OA 17	Cucurbita pepo	NA	NA	Landrace	Arab States	0.331291	1e-05	0.038156	0.053516	0.182966	1e-05	1e-05	0.209378	1e-05	0.184654	1	710
PI_534628	No	Syria	OD 10428	Cucurbita pepo	NA	NA	Landrace	Arab States	0.591111	1e-05	0.060985	1e-05	0.163531	1e-05	1e-05	0.173532	1e-05	0.010791	1	704
PI_534561	No	Syria	OA 11	Cucurbita pepo	NA	NA	Landrace	Arab States	0.148025	1e-05	0.341131	1e-05	0.015863	1e-05	1e-05	1e-05	1e-05	0.49492	1	639
PI_534567	No	Syria	OA 84	Cucurbita pepo	NA	NA	Landrace	Arab States	0.361966	0.058774	0.027193	0.014676	0.057273	0.095096	1e-05	0.20236	0.107548	0.075103	1	731
PI_534632	No	Syria	OD 10460	Cucurbita pepo	NA	NA	Landrace	Arab States	0.724807	1e-05	0.050778	1e-05	0.123369	1e-05	0.040053	1e-05	1e-05	0.060943	7	74
PI_534634	No	Syria	OD 10473	Cucurbita pepo	NA	NA	Landrace	Arab States	0.235005	1e-05	0.32056	1e-05	0.105702	0.002773	0.023677	1e-05	1e-05	0.312243	1	644
PI_534565	No	Syria	OA 39	Cucurbita pepo	NA	NA	Landrace	Arab States	0.370443	1e-05	0.267843	1e-05	0.041359	0.010108	1e-05	1e-05	0.00223	0.307978	1	638
PI_181912	No	Syria	Hama No. 7	Cucurbita pepo	NA	NA	Landrace	Arab States	0.049996	1e-05	0.059081	1e-05	0.718796	1e-05	1e-05	0.037452	1e-05	0.134625	3	330
PI_534557	No	Syria	OA 2	Cucurbita pepo	NA	NA	Landrace	Arab States	0.395526	1e-05	0.044903	0.005044	0.290642	1e-05	1e-05	0.18079	1e-05	0.083055	1	705
PI_181944	No	Syria	Homs No. 10	Cucurbita pepo	NA	NA	Landrace	Arab States	0.041585	0.003919	0.076379	1e-05	0.523217	0.023517	1e-05	0.109956	0.029128	0.192279	3	280
PI_534560	No	Syria	OA 8	Cucurbita pepo	NA	NA	Landrace	Arab States	0.337203	1e-05	0.050512	0.050417	0.207115	1e-05	0.034348	0.262323	0.019546	0.038515	1	717
PI_534559	No	Syria	OA 7	Cucurbita pepo	NA	NA	Landrace	Arab States	0.99991	1e-05	1e-05	1e-05	1e-05	1e-05	1e-05	1e-05	1e-05	1e-05	7	69
PI_534566	No	Syria	OA 41	Cucurbita pepo	NA	NA	Landrace	Arab States	0.379989	0.007742	0.064057	0.049772	0.172697	1e-05	0.01595	0.282091	1e-05	0.027682	1	716
PI_177377	No	Syria	Kusa	Cucurbita pepo	NA	NA	Landrace	Arab States	0.056828	0.003807	0.04912	1e-05	0.778603	0.017504	1e-05	0.013984	0.011219	0.068915	3	257
PI_181757	No	Syria	Beledi	Cucurbita pepo	Market, Damascus.	NA	Landrace	Arab States	0.166694	1e-05	0.388167	1e-05	1e-05	0.010653	1e-05	1e-05	1e-05	0.434425	1	641
PI_534564	No	Syria	OA 36	Cucurbita pepo	NA	NA	Landrace	Arab States	0.452899	1e-05	0.198538	1e-05	0.081987	0.005815	0.006079	1e-05	0.026137	0.228515	1	637
PI_534569	No	Syria	OA 143	Cucurbita pepo	NA	NA	Landrace	Arab States	0.99991	1e-05	1e-05	1e-05	1e-05	1e-05	1e-05	1e-05	1e-05	1e-05	7	70
PI_181878	No	Syria	Allepo No. 5	Cucurbita pepo	NA	NA	Landrace	Arab States	1e-05	0.031816	0.040336	1e-05	0.737949	0.022499	0.000539	1e-05	0.006765	0.160066	3	295
PI_534568	No	Syria	OA 127	Cucurbita pepo	NA	NA	Landrace	Arab States	0.226883	1e-05	0.215814	1e-05	0.114998	0.011045	0.043128	0.011685	0.016823	0.359605	1	643
PI_534571	No	Syria	OA 231	Cucurbita pepo	NA	NA	Landrace	Arab States	0.957677	1e-05	1e-05	1e-05	0.042243	1e-05	1e-05	1e-05	1e-05	1e-05	7	63
PI_534635	No	Syria	OD 10481	Cucurbita pepo	NA	NA	Landrace	Arab States	0.152149	0.025405	0.386337	1e-05	1e-05	0.009187	0.018255	1e-05	1e-05	0.408627	1	642
Ames_25701	No	Syria	S108	Cucurbita pepo	NA	NA	Uncertain improvement status	Arab States	0.99991	1e-05	1e-05	1e-05	1e-05	1e-05	1e-05	1e-05	1e-05	1e-05	7	73
PI_534558	No	Syria	OA 3	Cucurbita pepo	NA	NA	Landrace	Arab States	0.453347	0.0268	0.064601	1e-05	0.151421	1e-05	0.009355	0.197121	1e-05	0.097326	1	707
PI_534639	No	Syria	OD 10522	Cucurbita pepo	NA	NA	Landrace	Arab States	0.939555	1e-05	1e-05	1e-05	1e-05	1e-05	0.03719	0.005721	1e-05	0.017473	7	62
Ames_25700	No	Syria	S028	Cucurbita pepo	Like zucchini, stuffed with rice to eat.	NA	Landrace	Arab States	0.99991	1e-05	1e-05	1e-05	1e-05	1e-05	1e-05	1e-05	1e-05	1e-05	7	72
PI_311741	No	Poland	Pulawska	Cucurbita pepo	NA	NA	Uncertain improvement status	Europe	0.038521	0.019429	1e-05	1e-05	0.004775	0.172738	1e-05	0.414547	0.26808	0.08188	4	525
Ames_25942	No	Poland	P044	Cucurbita pepo	NA	NA	Cultivated material	Europe	0.066656	0.032942	0.027839	0.033424	0.016581	0.162274	0.027375	0.359162	0.104577	0.16917	1	689
PI_285611	No	Poland	NA	Cucurbita pepo	NA	NA	Uncertain improvement status	Europe	0.052803	0.03565	1e-05	1e-05	1e-05	0.215978	1e-05	0.373546	0.22156	0.100424	4	527
Ames_25943	No	Poland	P057	Cucurbita pepo	NA	NA	Cultivated material	Europe	0.055263	1e-05	1e-05	0.040322	0.042113	0.197195	0.036242	0.342359	0.121543	0.164943	1	690
Ames_25941	No	Poland	P031	Cucurbita pepo	NA	NA	Cultivated material	Europe	0.133158	0.034983	1e-05	0.050299	0.004781	0.196528	0.023098	0.252299	0.115932	0.188913	1	691
Ames_25945	No	Poland	P101	Cucurbita pepo	NA	NA	Cultivated material	Europe	0.080157	0.052474	1e-05	0.105119	1e-05	0.166701	0.007247	0.376605	0.167375	0.044303	4	522
Ames_25944	No	Poland	P085	Cucurbita pepo	NA	NA	Cultivated material	Europe	0.097692	0.062316	1e-05	1e-05	1e-05	0.236998	0.005202	0.392249	0.189371	0.016141	4	523
Ames_26617	No	United States	DSW 813	Cucurbita pepo var. ozarkana	NA	NA	Wild material	North America	1e-05	0.021369	0.840404	0.029669	1e-05	0.030678	0.000771	0.041943	1e-05	0.035136	2	459
Ames_26833	No	United States	Ames 26833	Cucurbita pepo var. ozarkana	NA	NA	Wild material	North America	1e-05	1e-05	0.999905	1e-05	1e-05	1.5e-05	1e-05	1e-05	1e-05	1e-05	2	415
Ames_26612	No	United States	DSW 808	Cucurbita pepo var. ozarkana	NA	NA	Wild material	North America	1e-05	1e-05	0.999908	1e-05	1e-05	1.2e-05	1e-05	1e-05	1e-05	1e-05	2	417
Ames_26878	No	United States	DSW 1272	Cucurbita pepo var. ozarkana	Flat, egg, or oblong shaped fruit, some grooved.	NA	Wild material	North America	1e-05	1e-05	0.99991	1e-05	1e-05	1e-05	1e-05	1e-05	1e-05	1e-05	2	443
Ames_26879	No	United States	DSW 1292	Cucurbita pepo var. ozarkana	Round, oval, oblong, or pear shaped, and white, striped, or bicolor fruit.	NA	Wild material	North America	0.026715	1e-05	0.873695	0.065168	1e-05	0.02788	1e-05	0.006492	1e-05	1e-05	2	461
PI_490278	No	United States	Butterball	Cucurbita pepo	Mix of two semi-bush types. Fruit globe or oblong shaped, tan. Hull-less seeds.	NA	Cultivated material	North America	0.011839	0.005288	0.340779	1e-05	0.233444	0.085663	0.003769	0.053744	0.000223	0.265241	3	393
Ames_26872	No	United States	DSW 1237	Cucurbita pepo var. ozarkana	Egg or oval shaped fruit.	NA	Wild material	North America	1e-05	1e-05	0.99991	1e-05	1e-05	1e-05	1e-05	1e-05	1e-05	1e-05	2	448
PI_615119	No	United States	Spaghetti squash	Cucurbita pepo	Commercial fruits.	NA	Cultivated material	North America	1e-05	1e-05	1e-05	1e-05	1e-05	1e-05	0.99991	1e-05	1e-05	1e-05	8	53
Ames_26624	No	United States	DSW 822	Cucurbita pepo var. ozarkana	NA	NA	Wild material	North America	0.01849	1e-05	0.943259	0.004298	1e-05	0.0193	0.014602	1e-05	1e-05	1e-05	2	407
Ames_26888	No	United States	DSW 1458	Cucurbita pepo var. ozarkana	Round or pear shaped fruit.	NA	Wild material	North America	1e-05	1e-05	0.999909	1e-05	1e-05	1e-05	1e-05	1.1e-05	1e-05	1e-05	2	418
PI_490279	No	United States	Sweetnut (Acorn)	Cucurbita pepo	Mix of three semi-bush types. Fruit globe, oblong or acorn shaped. Hull-less seeds.	NA	Cultivated material	North America	0.008979	1e-05	0.413584	1e-05	0.308172	0.073372	1e-05	0.05633	0.024267	0.115266	3	390
Ames_26875	No	United States	DSW 1263	Cucurbita pepo var. ozarkana	Pear shaped fruit.	NA	Wild material	North America	1e-05	1e-05	0.9999	1e-05	1e-05	2e-05	1e-05	1e-05	1e-05	1e-05	2	409
PI_615152	No	United States	Little Chicago Miniature Pumpkin	Cucurbita pepo	Composite of 7 strains (including 2 gourd influenced); white, yellow, orange, etc.; all developed locally.	NA	Cultivated material	North America	0.017709	0.001941	0.817027	0.018489	1e-05	0.039067	0.018869	0.068269	1e-05	0.018611	2	460
Ames_26616	No	United States	DSW 812	Cucurbita pepo var. ozarkana	NA	NA	Wild material	North America	1e-05	1e-05	0.99991	1e-05	1e-05	1e-05	1e-05	1e-05	1e-05	1e-05	2	452
Ames_26620	No	United States	DSW 816	Cucurbita pepo var. ozarkana	NA	NA	Wild material	North America	1e-05	1e-05	0.99991	1e-05	1e-05	1e-05	1e-05	1e-05	1e-05	1e-05	2	450
PI_614687	No	United States	HDW 3173	Cucurbita pepo var. texana	Fruit from a single plant; spherical with no constrictions. Although brown, fruits may be from last year.	NA	Wild material	North America	1e-05	1e-05	0.99991	1e-05	1e-05	1e-05	1e-05	1e-05	1e-05	1e-05	2	425
PI_614689	No	United States	HDW 5299	Cucurbita pepo var. texana	NA	NA	Wild material	North America	1e-05	2e-05	0.9999	1e-05	1e-05	1e-05	1e-05	1e-05	1e-05	1e-05	2	412
Ames_26871	No	United States	DSW 1232	Cucurbita pepo var. ozarkana	Flat, round, or pear shaped fruit.	NA	Wild material	North America	1e-05	1e-05	0.99991	1e-05	1e-05	1e-05	1e-05	1e-05	1e-05	1e-05	2	446
PI_282487	No	United States	GC 60	Cucurbita pepo	Self-pollinated fruit from prolific bush plant; fruit resembles 'Little Gem', but more flattened. Edible and ornamental.	NA	Cultivated material	North America	0.066181	0.11395	0.248721	0.066152	1e-05	0.244331	0.015331	0.15	0.095314	1e-05	2	478
PI_285213	No	United States	NA	Cucurbita pepo var. texana	NA	NA	Wild material	North America	1e-05	1e-05	0.99991	1e-05	1e-05	1e-05	1e-05	1e-05	1e-05	1e-05	2	434
Ames_26876	No	United States	DSW 1264	Cucurbita pepo var. ozarkana	NA	NA	Wild material	North America	1e-05	1e-05	0.99991	1e-05	1e-05	1e-05	1e-05	1e-05	1e-05	1e-05	2	445
Ames_26877	No	United States	DSW 1269	Cucurbita pepo var. ozarkana	Flat, round, egg, pear, or oblong shaped fruit, some grooved.	NA	Wild material	North America	1e-05	1e-05	0.99991	1e-05	1e-05	1e-05	1e-05	1e-05	1e-05	1e-05	2	444
PI_614700	No	United States	292 Population 4	Cucurbita pepo var. ozarkana	Population 4: (Five neaby populations collected in all.) Green striped fruits hanging from dead vines growing 6 meters up into trees tangles with other vines including Campsis radicans. Fruits pyriform with long narrow necks or without necks. Flesh non-bitter.	NA	Wild material	North America	1e-05	1e-05	0.99991	1e-05	1e-05	1e-05	1e-05	1e-05	1e-05	1e-05	2	419
PI_614685	No	United States	HDW 3180	Cucurbita pepo var. texana	Sample of 5, relatively uniform, more or less spherical (no terminal constriction). Number of plants, maybe 1.	NA	Wild material	North America	1e-05	1e-05	0.99991	1e-05	1e-05	1e-05	1e-05	1e-05	1e-05	1e-05	2	426
Ames_26619	No	United States	DSW 815	Cucurbita pepo var. ozarkana	NA	NA	Wild material	North America	1e-05	1e-05	0.99991	1e-05	1e-05	1e-05	1e-05	1e-05	1e-05	1e-05	2	451
Ames_26883	No	United States	DSW 1323	Cucurbita pepo var. ozarkana	Flat or round shaped fruit.	NA	Wild material	North America	1e-05	1e-05	0.99991	1e-05	1e-05	1e-05	1e-05	1e-05	1e-05	1e-05	2	442
Ames_26622	No	United States	DSW 819	Cucurbita pepo var. ozarkana	NA	NA	Wild material	North America	1e-05	1e-05	0.99991	1e-05	1e-05	1e-05	1e-05	1e-05	1e-05	1e-05	2	449
Ames_26887	No	United States	DSW 1457	Cucurbita pepo var. ozarkana	Round or oval shaped fruit.	NA	Wild material	North America	1e-05	1e-05	0.99991	1e-05	1e-05	1e-05	1e-05	1e-05	1e-05	1e-05	2	440
PI_282486	No	United States	GC 59	Cucurbita pepo	Similar to GC 58 (PI 282485), except yellow star very subdued. Seed from selfed fruit 5985-4. Comments from CG 58 similar to GC 57 (PI 282484), except yellow star not prominent. Comments from GC 57 (PI 282484) 'Meader Star' from the Univ. of New Hampshire, Durham. 'Table Queen' shape with yellow star on proximal end; seed naked.	NA	Cultivated material	North America	1e-05	1e-05	0.74395	1e-05	1e-05	0.12251	1e-05	0.113771	0.019709	1e-05	2	397
Ames_26889	No	United States	DSW 1459	Cucurbita pepo var. ozarkana	Elongated pear shaped fruit.	NA	Wild material	North America	1.3e-05	1e-05	0.999907	1e-05	1e-05	1e-05	1e-05	1e-05	1e-05	1e-05	2	416
Ames_26890	No	United States	DSW 1483	Cucurbita pepo var. ozarkana	Flat, round, or mildly oblong shaped fruit.	NA	Wild material	North America	1e-05	1e-05	0.99991	1e-05	1e-05	1e-05	1e-05	1e-05	1e-05	1e-05	2	439
Ames_26891	No	United States	1282	Cucurbita pepo var. texana	Egg shaped fruit.	NA	Wild material	North America	1e-05	1e-05	0.99991	1e-05	1e-05	1e-05	1e-05	1e-05	1e-05	1e-05	2	438
Ames_26873	No	United States	DSW 1240	Cucurbita pepo var. ozarkana	Flat, round, oval, oblong, or pear shaped fruit.	NA	Wild material	North America	1e-05	1e-05	0.99991	1e-05	1e-05	1e-05	1e-05	1e-05	1e-05	1e-05	2	447
Ames_26893	No	United States	1284	Cucurbita pepo var. texana	Egg shaped fruit.	NA	Wild material	North America	1e-05	1e-05	0.99991	1e-05	1e-05	1e-05	1e-05	1e-05	1e-05	1e-05	2	436
Ames_26894	No	United States	1285	Cucurbita pepo var. texana	Round, egg, or oblong shaped fruit.	NA	Wild material	North America	1.9e-05	1e-05	0.999901	1e-05	1e-05	1e-05	1e-05	1e-05	1e-05	1e-05	2	413
Ames_26951	No	United States	Ames 26951	Cucurbita pepo	Wild gourd. Fruits green with white stripes and solid white, various shapes, very bitter, and separate from stem very easily. Stigma seem very long and narrow. Increased in garden of donor by hand pollination, Mansfield Center, Connecticut.	NA	Wild material	North America	1e-05	1e-05	0.99991	1e-05	1e-05	1e-05	1e-05	1e-05	1e-05	1e-05	2	422
PI_614701	No	United States	292 Population 3	Cucurbita pepo var. ozarkana	Population 3: (Five nearby populations collected in all.) Green striped fruits hanging from dead vines growing 6 meters up into trees tangled with other vines including Campsis radicans. Fruits uniformly obloid to transversely ellipsoid. Flesh non-bitter.	NA	Wild material	North America	1e-05	1e-05	0.99991	1e-05	1e-05	1e-05	1e-05	1e-05	1e-05	1e-05	2	420
PI_518688	No	United States	33272	Cucurbita pepo	Delicata or Dumpling type - grouped with acorn type.	NA	Cultivated material	North America	1e-05	1e-05	0.469846	1e-05	1e-05	0.004267	0.525817	1e-05	1e-05	1e-05	2	472
PI_267664	No	United States	Yellow Long	Cucurbita pepo	Midseason variety; vigorous vine; fruit oblong, 11.5 by 5 inches, smooth, deep orange netted; flesh 0.75 inch, yellow or orange; seeds dark green; embryo naked.	NA	Uncertain improvement status	North America	0.14211	0.07919	1e-05	1e-05	1e-05	0.34761	1e-05	0.257906	0.173135	1e-05	1	686
Ames_26609	No	United States	DSW 804	Cucurbita pepo var. ozarkana	NA	NA	Wild material	North America	1e-05	1e-05	0.99991	1e-05	1e-05	1e-05	1e-05	1e-05	1e-05	1e-05	2	454
Ames_26610	No	United States	DSW 806	Cucurbita pepo var. ozarkana	NA	NA	Wild material	North America	1.3e-05	1.7e-05	0.999899	1e-05	1.1e-05	1e-05	1e-05	1e-05	1e-05	1e-05	2	411
Ames_26611	No	United States	DSW 807	Cucurbita pepo var. ozarkana	NA	NA	Wild material	North America	1e-05	1e-05	0.99991	1e-05	1e-05	1e-05	1e-05	1e-05	1e-05	1e-05	2	453
PI_614684	No	United States	HDW 3163	Cucurbita pepo var. texana	21 fruits of varying shape, number of plants unknown.	NA	Wild material	North America	1e-05	1e-05	0.99991	1e-05	1e-05	1e-05	1e-05	1e-05	1e-05	1e-05	2	424
Ames_26952	No	United States	Paydon Heirloom	Cucurbita pepo	Vining, large acorn type, 80-115 days, tan, cream speckled skin, most fruit has sweet yellowish flesh which is somewhat stringy. Paydon family heirloom via France to Louisiana to Ohio to Bosco, Illinois since 1860's.	NA	Landrace	North America	1e-05	1e-05	0.891284	0.013264	1e-05	0.024281	1e-05	1e-05	0.071111	1e-05	2	464
PI_614686	No	United States	HDW 3162	Cucurbita pepo var. texana	Fruits ovate to spherical - not pyriform. Number of plants not known.	NA	Wild material	North America	1e-05	1e-05	0.99991	1e-05	1e-05	1e-05	1e-05	1e-05	1e-05	1e-05	2	427
PI_615087	No	United States	PQ 016174	Cucurbita pepo	NA	NA	Uncertain improvement status	North America	0.035991	0.00675	0.812792	0.033133	1e-05	0.070658	0.034414	1e-05	0.006231	1e-05	2	462
PI_614688	No	United States	HDW 3170	Cucurbita pepo var. texana	Number of plants unknown; some progeny in collection of 55 packets. From different parts of Colorado drainage and from different plants.	NA	Wild material	North America	1e-05	1e-05	0.999902	1e-05	1e-05	1.8e-05	1e-05	1e-05	1e-05	1e-05	2	410
PI_614690	No	United States	HDW 5533	Cucurbita pepo var. texana	Essentially a recollection of TE039 (Not in NPGS); number of plants = 4.	NA	Wild material	North America	1e-05	1e-05	0.999901	1.3e-05	1.2e-05	1e-05	1e-05	1.4e-05	1e-05	1e-05	2	414
PI_614691	No	United States	HDW 5544	Cucurbita pepo var. texana	Fruit = 6; number of parent plants unknown.	NA	Wild material	North America	1e-05	1e-05	0.99991	1e-05	1e-05	1e-05	1e-05	1e-05	1e-05	1e-05	2	431
PI_614692	No	United States	292 Population 5	Cucurbita pepo var. ozarkana	Population 5: (Five nearby populations collected in all.) Green striped fruits hanging from dead vines growing 6 meters up into trees tangled with other vines including Campsis radicans. Fruits pyriform with short wide necks. Flesh non-bitter.	NA	Wild material	North America	1e-05	1e-05	0.999909	1e-05	1e-05	1.1e-05	1e-05	1e-05	1e-05	1e-05	2	457
PI_614694	No	United States	293	Cucurbita pepo var. ozarkana	Faded green fruits, narrow pyriform shape with short narrow necks at stem end. Flesh non-bitter. Mostly scattered on ground. A serious weed problem. One young vine was still green with some slight virus symptoms and mildew.	NA	Wild material	North America	1e-05	1e-05	0.99991	1e-05	1e-05	1e-05	1e-05	1e-05	1e-05	1e-05	2	429
Ames_26892	No	United States	1283	Cucurbita pepo var. texana	Egg, elongated egg, or pear shaped fruit.	NA	Wild material	North America	1e-05	1e-05	0.99991	1e-05	1e-05	1e-05	1e-05	1e-05	1e-05	1e-05	2	437
PI_614698	No	United States	14712	Cucurbita pepo var. ozarkana	NA	NA	Wild material	North America	1e-05	1e-05	0.99991	1e-05	1e-05	1e-05	1e-05	1e-05	1e-05	1e-05	2	432
PI_614699	No	United States	292 Populations 1 & 2	Cucurbita pepo var. ozarkana	Populations 1 and 2: (Five nearby populations collected in all.) Green striped fruits hanging from dead vines growing 6 meters up into trees tangled with other vines including Campsis radicans. Fruits uniformly obloid to transversely ellipsoid. Flesh non-bitter.	NA	Wild material	North America	1e-05	1e-05	0.99991	1e-05	1e-05	1e-05	1e-05	1e-05	1e-05	1e-05	2	433
Ames_26882	No	United States	DSW 1321	Cucurbita pepo var. ozarkana	Pear or lump-in-neck shaped fruit.	NA	Wild material	North America	1e-05	1e-05	0.99991	1e-05	1e-05	1e-05	1e-05	1e-05	1e-05	1e-05	2	441
Ames_26885	No	United States	DSW 1436	Cucurbita pepo var. ozarkana	Escapes from cultivation? Flat or round shaped fruit, some grooved, and some turning orange, but all small.	NA	Wild material	North America	1.6e-05	1e-05	0.974443	0.005365	1e-05	1e-05	0.020116	1e-05	1e-05	1e-05	2	408
Ames_26608	No	United States	DSW 803	Cucurbita pepo var. ozarkana	NA	NA	Wild material	North America	1e-05	1e-05	0.99991	1e-05	1e-05	1e-05	1e-05	1e-05	1e-05	1e-05	2	455
PI_267663	No	United States	Yellow Oval	Cucurbita pepo	Vigorous prolific vine; earliest fruit semi-globe 9 by 7 inches, smooth, deep orange, netted; flesh one inch thick, yellow or cream; seeds dark green; embryo naked.	NA	Uncertain improvement status	North America	0.118709	0.09539	1e-05	1e-05	1e-05	0.27222	1e-05	0.338204	0.175427	1e-05	1	684
PI_615086	No	United States	Ames 2804	Cucurbita pepo	Supposed to have outstanding resistance to Cucumber Mosaic Virus (CMV) and powdery mildew.	NA	Uncertain improvement status	North America	0.024075	1e-05	0.535908	1e-05	0.136108	0.070611	0.07514	0.061001	0.046283	0.050855	2	484
PI_518687	No	United States	Acorn Squash	Cucurbita pepo	NA	NA	Cultivated material	North America	1e-05	1e-05	0.90208	1e-05	0.009785	0.026748	1e-05	1e-05	0.061326	1e-05	2	463
PI_267661	No	United States	Green Long No. 2	Cucurbita pepo	Midseason variety; vigorous vine; fruit 13 by 5 inches, oblong, with 10 faint ridges, deep orange, netted; flesh one inch thick, orange; seeds dark green; embryo naked.	NA	Uncertain improvement status	North America	0.088383	0.063047	1e-05	1e-05	0.014744	0.330311	1e-05	0.327647	0.175827	1e-05	1	683
PI_267660	No	United States	Green Long No. 1	Cucurbita pepo	Midseason variety; vine of medium vigor; fruits 12 by 5 inches, tapering oblong, dark green netted, orange striped; flesh one inch thick; seeds dark green; embryo naked. Some fruits have dark orange flesh.	NA	Uncertain improvement status	North America	0.068992	0.016439	0.380165	0.026414	1.3e-05	0.242159	0.021545	0.137081	0.107181	1e-05	2	477
PI_614695	No	United States	290	Cucurbita pepo var. ozarkana	Six fruits (3 faded green and 3 nearly dried) together on a dead vine on the ground. Fruits uniformly pyriform, faintly striped. Flesh non-bitter.	NA	Wild material	North America	1e-05	1e-05	0.99991	1e-05	1e-05	1e-05	1e-05	1e-05	1e-05	1e-05	2	430
Ames_26607	No	United States	DSW 802	Cucurbita pepo var. ozarkana	NA	NA	Wild material	North America	1e-05	1e-05	0.999909	1e-05	1e-05	1.1e-05	1e-05	1e-05	1e-05	1e-05	2	456
PI_267662	No	United States	Green Stripe	Cucurbita pepo	Midseason variety; vine of medium vigor; fruits 12 by 5 inches, oblong, smooth, deep orange, green striped; flesh 0.75 inch thick, orange, seeds dark green; embryo naked.	NA	Uncertain improvement status	North America	0.084689	0.027769	1e-05	0.037274	0.001493	0.338709	1e-05	0.275052	0.234983	1e-05	1	685
Ames_28296	No	Tajikistan	TJK 2006:132	Cucurbita pepo	Cultivated more than 15 years. Seeds are the farmer's selection. Used for cooking dumpling (samsa).	NA	Cultivated material	Asia	0.01962	1e-05	0.861283	0.019986	0.033043	0.066019	1e-05	1e-05	1e-05	1e-05	2	471
Ames_29181	No	Georgia	GSMO 1-6	Cucurbita pepo	Very tasty, no insect or disease problems.	NA	Landrace	Europe	1e-05	0.059365	0.0048	0.045455	1e-05	0.016377	0.010944	0.097474	1e-05	0.765555	1	584
Ames_29180	No	Georgia	GSMO 1-5	Cucurbita pepo	Normal thickness of seed hull.	NA	Landrace	Europe	0.003931	0.045978	0.025611	0.035345	0.038467	1e-05	1e-05	0.176595	1e-05	0.674043	1	619
Ames_29179	No	Georgia	GSMO 1-4	Cucurbita pepo	Thin-hulled seed, tasty, sweet.	NA	Landrace	Europe	0.02826	1e-05	1e-05	1e-05	0.088473	0.090906	0.608817	0.082878	0.018497	0.082139	8	58
PI_165004	No	Turkey	Karakabak	Cucurbita pepo	Black. Kabak = pumpkin/squash.	NA	Landrace	Europe	0.013044	0.027801	0.033211	0.018875	0.359503	0.016163	0.046485	0.218154	0.02091	0.245854	1	656
PI_165018	No	Turkey	Dolma Kabagi	Cucurbita pepo	Pumpkin.	NA	Landrace	Europe	0.052454	1e-05	1e-05	0.0016	0.611505	1e-05	1e-05	0.1578	0.057428	0.119172	3	284
PI_173686	No	Turkey	7878	Cucurbita pepo	Governors garden, Hakari, Hakari.	NA	Landrace	Europe	0.050084	0.035442	1e-05	1e-05	0.353419	0.053928	1e-05	0.153622	1e-05	0.353465	1	661
PI_174183	No	Turkey	Sakiz	Cucurbita pepo	Resistant to scab. Seed dealer, Diyarbakir.	NA	Landrace	Europe	0.060911	1e-05	1e-05	1e-05	0.854373	1e-05	1e-05	1e-05	1e-05	0.084645	3	231
PI_174187	No	Turkey	Dolma	Cucurbita pepo	Market, Birecik, Urfa.	NA	Landrace	Europe	0.032393	1e-05	0.340834	1e-05	0.402675	0.003197	0.017621	0.029627	1e-05	0.173624	3	389
PI_169429	No	Turkey	1841	Cucurbita pepo	Mixed types. Market, Mugla.	NA	Landrace	Europe	1e-05	1e-05	1e-05	1e-05	0.659023	0.004366	0.019661	0.102614	0.0789	0.135396	3	328
PI_174182	No	Turkey	8057	Cucurbita pepo	Seed dealer, Diyarbakir.	NA	Landrace	Europe	1e-05	1e-05	0.031232	1e-05	0.657423	0.01714	0.030154	0.047183	1e-05	0.216828	3	313
PI_174180	No	Turkey	Sakiz	Cucurbita pepo	Resistant to scab.	NA	Landrace	Europe	1e-05	0.012409	0.058556	0.005169	0.727568	0.02569	0.015068	1e-05	1e-05	0.155511	3	294
PI_164957	No	Turkey	Sakiz Kabak	Cucurbita pepo	White, narrow type. Kabak = pumpkin/squash.	NA	Landrace	Europe	1e-05	1e-05	0.011949	1e-05	0.896243	1e-05	0.046948	1e-05	0.044799	1e-05	3	215
PI_164997	No	Turkey	Tergomlek	Cucurbita pepo	Grown for its edible seeds which are oily and nearly shell-less.	NA	Landrace	Europe	0.028728	1e-05	0.007536	0.058809	0.132042	0.077776	0.231985	0.270674	0.001262	0.191177	1	668
PI_165071	No	Turkey	Sakiz Kabagi	Cucurbita pepo	Pumpkin.	NA	Landrace	Europe	0.024129	1e-05	0.002221	0.016828	0.670204	0.006318	0.00588	0.100834	0.023802	0.149773	3	338
PI_174188	No	Turkey	Dolmalik	Cucurbita pepo	Seed dealer, Nizip, Gaziantep.	NA	Landrace	Europe	0.046683	1e-05	0.332681	0.026111	0.304514	0.046408	0.003247	1e-05	0.011561	0.228775	3	394
PI_174189	No	Turkey	Girit	Cucurbita pepo	Market, Gaziantep, Gaziantep.	NA	Landrace	Europe	0.030786	1e-05	0.044703	1e-05	0.79236	0.001098	1e-05	0.057875	1e-05	0.073138	3	256
PI_169462	No	Turkey	Sakiz Kabak	Cucurbita pepo	Kabak = pumpkin/squash.	NA	Landrace	Europe	0.007316	1e-05	0.035896	0.015194	0.455184	1e-05	0.065132	0.054851	0.017771	0.348637	3	376
PI_174195	No	Turkey	8177	Cucurbita pepo	NA	NA	Landrace	Europe	1e-05	0.009399	0.069734	1e-05	0.767853	0.001763	0.016315	0.019996	1e-05	0.11491	3	293
PI_169435	No	Turkey	Bal Kabak	Cucurbita pepo	Kabak = pumpkin/squash. Market, Akhisar, Manisa.	NA	Landrace	Europe	0.03796	1e-05	0.048232	1e-05	0.470209	0.004557	0.041112	0.100599	0.047412	0.249898	3	373
PI_109486	No	Turkey	T 524	Cucurbita pepo	From Ankara bazar.	NA	Landrace	Europe	1e-05	0.447872	0.389218	1e-05	0.045138	0.117712	1e-05	1e-05	1e-05	1e-05	6	170
PI_167084	No	Turkey	Kabak	Cucurbita pepo	Kabak = pumpkin/squash.	NA	Landrace	Europe	1e-05	1e-05	1e-05	1e-05	0.99991	1e-05	1e-05	1e-05	1e-05	1e-05	3	205
PI_167136	No	Turkey	Kabak	Cucurbita pepo	Kabak = pumpkin/squash.	NA	Landrace	Europe	1e-05	1e-05	0.009551	1e-05	0.932375	1e-05	0.00511	0.052904	1e-05	1e-05	3	220
PI_175705	No	Turkey	5458	Cucurbita pepo	NA	NA	Landrace	Europe	0.025411	1e-05	1e-05	1e-05	0.889945	1e-05	1e-05	0.012172	0.020632	0.05179	3	247
PI_174185	No	Turkey	Dolma	Cucurbita pepo	Small type. Market, Urfa, Urfa.	NA	Landrace	Europe	1e-05	1e-05	0.147701	1e-05	0.708861	1e-05	0.02563	0.024486	1e-05	0.093271	3	291
PI_174184	No	Turkey	Kestane	Cucurbita pepo	Seed dealer, Mardin, Mardin. Received as mixture with C. maxima (C. maxima assigned PI 199031).	NA	Landrace	Europe	1e-05	1e-05	0.019774	1e-05	0.73468	1e-05	0.007616	0.019822	0.116159	0.101908	3	341
PI_174186	No	Turkey	8312	Cucurbita pepo	Market, Suruc, Urfa.	NA	Landrace	Europe	1e-05	1e-05	0.026417	1e-05	0.973503	1e-05	1e-05	1e-05	1e-05	1e-05	3	199
PI_167392	No	Turkey	Kabak	Cucurbita pepo	Kabak = pumpkin/squash.	NA	Landrace	Europe	1e-05	1e-05	1e-05	1e-05	0.976895	1e-05	0.004948	1e-05	0.018087	1e-05	3	198
PI_175711	No	Turkey	Dolmalik	Cucurbita pepo	Seed dealer, Kayseri, Kayseri.	NA	Landrace	Europe	0.001977	1e-05	0.04219	1e-05	0.454642	1e-05	1e-05	1e-05	1e-05	0.501132	3	356
PI_169449	No	Turkey	Bal Kabak	Cucurbita pepo	Kabak = pumpkin/squash. Seed stores, Kirklareli, Kirklareli.	NA	Landrace	Europe	1e-05	0.024133	0.07465	1e-05	0.034294	1e-05	0.037463	0.321763	0.062314	0.445353	1	607
PI_174190	No	Turkey	Kosesefer	Cucurbita pepo	NA	NA	Landrace	Europe	0.073504	1e-05	0.319634	1e-05	0.394614	0.035534	1e-05	1e-05	0.006174	0.1705	3	388
PI_174192	No	Turkey	Sakiz	Cucurbita pepo	NA	NA	Landrace	Europe	0.027782	0.006414	0.042263	1e-05	0.360744	0.013214	0.006054	0.021761	0.041501	0.480257	3	349
PI_169452	No	Turkey	Kara Kabak	Cucurbita pepo	Kabak = pumpkin/squash. Seed stores, Kirklareli, Kirklareli.	NA	Landrace	Europe	1e-05	1e-05	0.032215	0.039615	0.037362	0.078247	0.010473	0.339608	1e-05	0.46245	1	605
PI_169421	No	Turkey	1539	Cucurbita pepo	NA	NA	Landrace	Europe	1e-05	1e-05	0.038726	1.1e-05	0.40518	1e-05	0.020789	0.198638	0.023209	0.313417	1	654
PI_174178	No	Turkey	Yumurta	Cucurbita pepo	Received as Cucurbita pepo var. ovifera. Small, egg-shaped. Seed dealer, Igdir, Kars.	NA	Landrace	Europe	1e-05	1e-05	0.99991	1e-05	1e-05	1e-05	1e-05	1e-05	1e-05	1e-05	2	435
PI_174179	No	Turkey	Yemeklik	Cucurbita pepo	NA	NA	Landrace	Europe	0.055264	0.053887	0.004002	0.038732	0.056826	0.008208	0.022911	0.151581	1e-05	0.608579	1	617
PI_169424	No	Turkey	Sakiz Kabagi	Cucurbita pepo	NA	NA	Landrace	Europe	0.001781	1e-05	0.003299	1e-05	0.398485	0.02265	0.206379	0.059497	0.166611	0.141278	3	347
PI_169426	No	Turkey	Dolmalik	Cucurbita pepo	Market, Burdur.	NA	Landrace	Europe	0.02991	1e-05	0.015004	1e-05	0.555439	1e-05	0.044385	0.055507	1e-05	0.299715	3	380
PI_165023	No	Turkey	Sakiz Kabak	Cucurbita pepo	Kabak = pumpkin/squash.	NA	Landrace	Europe	1e-05	0.039161	1e-05	1e-05	0.411282	0.01984	0.062023	0.117944	0.012629	0.337092	1	657
PI_169427	No	Turkey	1768	Cucurbita pepo	NA	NA	Landrace	Europe	0.028519	0.00187	1e-05	0.004986	0.812931	1e-05	0.003584	0.011867	0.103066	0.033158	3	264
PI_176553	No	Turkey	9576	Cucurbita pepo	NA	NA	Landrace	Europe	0.001355	0.000198	0.027009	1e-05	0.65481	0.00265	0.024828	0.038587	0.024692	0.22586	3	312
PI_169428	No	Turkey	1838	Cucurbita pepo	Market, Mugla, Mugla.	NA	Landrace	Europe	1e-05	0.00311	0.381916	0.004843	0.494801	0.028364	1e-05	0.011976	1e-05	0.07496	3	386
PI_176961	No	Turkey	6152	Cucurbita pepo	NA	NA	Landrace	Europe	1e-05	1e-05	1e-05	1e-05	0.636793	1e-05	1e-05	0.083101	0.059498	0.220548	3	320
PI_166992	No	Turkey	Kabak	Cucurbita pepo	Kabak = pumpkin/squash.	NA	Landrace	Europe	1e-05	1e-05	1e-05	1e-05	0.99991	1e-05	1e-05	1e-05	1e-05	1e-05	3	212
PI_167036	No	Turkey	Dolmalik Kabak	Cucurbita pepo	Kabak = pumpkin/squash.	NA	Landrace	Europe	0.054514	1e-05	0.065659	0.018414	0.476079	0.034125	0.038618	0.135724	0.054047	0.12281	3	279
PI_169432	No	Turkey	Dolmalik	Cucurbita pepo	NA	NA	Landrace	Europe	1e-05	1e-05	0.04202	1e-05	0.707703	1e-05	1e-05	0.128102	0.076131	0.045994	3	326
PI_169434	No	Turkey	Kara Kabak	Cucurbita pepo	Black type. Kabak = pumpkin/squash. Market, Akhisar, Manisa.	NA	Landrace	Europe	0.000115	1e-05	1e-05	0.004653	0.258552	1e-05	0.060734	0.239773	1e-05	0.436134	1	589
PI_169436	No	Turkey	Sakiz Kabak	Cucurbita pepo	Kabak = pumpkin/squash. Market, Akhisar, Manisa.	NA	Landrace	Europe	1e-05	1e-05	0.001464	0.005939	0.754385	1e-05	0.020721	0.009495	0.012781	0.195184	3	296
PI_169437	No	Turkey	Pestel Kabak	Cucurbita pepo	Kabak = pumpkin/squash. Market, Akhisar, Manisa.	NA	Landrace	Europe	1e-05	1e-05	0.021411	1e-05	0.136219	1e-05	0.074663	0.292876	1e-05	0.474781	1	597
PI_169438	No	Turkey	2167	Cucurbita pepo	Seed stores and markets, Soma, Manisa Province. Originally from Siman, Balikesir.	NA	Landrace	Europe	1e-05	0.00368	1e-05	1e-05	0.182976	1e-05	0.064454	0.278625	1e-05	0.470214	1	595
PI_169425	No	Turkey	Ufak Kabak	Cucurbita pepo	Small type. From tree nursery, Burdur, Burdur. Kabak = pumpkin/squash.	NA	Landrace	Europe	1e-05	0.017907	0.03718	1e-05	0.359283	0.015096	0.020194	0.237873	1e-05	0.312438	1	651
PI_176551	No	Turkey	9558	Cucurbita pepo	Grain market, Eskisehir, Eskisehir.	NA	Landrace	Europe	1e-05	1e-05	0.029957	1e-05	0.067581	0.047827	0.098826	0.282146	0.064874	0.40876	1	608
PI_169445	No	Turkey	Sakiz Kabak	Cucurbita pepo	Kabak = pumpkin/squash. Seed store, Istanbul, Istanbul.	NA	Landrace	Europe	1e-05	1e-05	0.001117	0.007839	0.886605	0.012552	1e-05	1e-05	0.043718	0.048129	3	242
PI_169446	No	Turkey	2359	Cucurbita pepo	Seed store, Istanbul.	NA	Landrace	Europe	1e-05	0.000179	1e-05	1e-05	0.667409	1e-05	0.039638	0.041895	0.19606	0.054779	3	342
PI_169447	No	Turkey	Kolsus Sakiz	Cucurbita pepo	NA	NA	Landrace	Europe	1e-05	1e-05	1e-05	1e-05	0.99991	1e-05	1e-05	1e-05	1e-05	1e-05	3	210
PI_165081	No	Turkey	Kabuksuz Kabak	Cucurbita pepo	Kabak = pumpkin. (Kabuksuz = unshelled; without shell, skin, bark.)	NA	Landrace	Europe	1e-05	1e-05	0.060881	0.066411	0.356177	0.006909	0.083064	0.107698	1e-05	0.318831	1	658
PI_169430	No	Turkey	1878	Cucurbita pepo	NA	NA	Landrace	Europe	1e-05	1e-05	1e-05	1e-05	0.133112	0.019259	0.076892	0.174936	0.024946	0.570815	1	635
PI_169431	No	Turkey	Sakiz Kabagi	Cucurbita pepo	Sweet type. Sakiz Kabagi =vegetable marrow pumpkin.	Marrow	Landrace	Europe	0.042015	0.014649	0.049443	1e-05	0.60875	0.004997	1e-05	0.045216	0.164135	0.070775	3	340
PI_169451	No	Turkey	2568	Cucurbita pepo	Seed stores, Kirklareli, Kirklareli.	NA	Landrace	Europe	1e-05	1e-05	0.002699	1e-05	0.200763	1e-05	0.055721	0.322966	1e-05	0.417801	1	593
PI_172863	No	Turkey	Kedo	Cucurbita pepo	NA	NA	Landrace	Europe	0.052923	0.046734	1e-05	0.059308	0.26943	0.041437	0.057189	0.079129	1e-05	0.393829	1	646
PI_167053	No	Turkey	Kabak	Cucurbita pepo	Kabak = pumpkin/squash.	NA	Landrace	Europe	1e-05	1e-05	0.003814	0.050543	0.905171	1e-05	1e-05	1e-05	0.040413	1e-05	3	213
PI_169454	No	Turkey	Sakiz Kabak	Cucurbita pepo	Kabak = pumpkin/squash.	NA	Landrace	Europe	1e-05	1e-05	1e-05	1e-05	0.852317	0.000194	0.016	0.029822	1e-05	0.101618	3	249
PI_167097	No	Turkey	Kabak	Cucurbita pepo	Kabak = pumpkin/squash.	NA	Landrace	Europe	1e-05	1e-05	0.003163	1e-05	0.990131	1e-05	0.006636	1e-05	1e-05	1e-05	3	200
PI_169442	No	Turkey	Sakiz Kabak	Cucurbita pepo	Kabak = pumpkin/squash. Seed stores and markets, Soma, Manisa Province.	NA	Landrace	Europe	0.030548	1e-05	0.004684	1e-05	0.658468	0.005141	0.039963	0.080436	0.092071	0.088669	3	327
PI_175706	No	Turkey	5998	Cucurbita pepo	NA	NA	Landrace	Europe	1e-05	1e-05	0.139689	1e-05	0.71062	1e-05	0.032113	1e-05	0.012495	0.105033	3	292
PI_167243	No	Turkey	Kabak	Cucurbita pepo	Kabak = pumpkin/squash.	NA	Landrace	Europe	1e-05	1e-05	1e-05	1e-05	0.955666	1e-05	1e-05	1e-05	0.043074	0.00119	3	196
PI_167364	No	Turkey	Kabak	Cucurbita pepo	Kabak = pumpkin/squash.	NA	Landrace	Europe	1e-05	0.040993	1e-05	1e-05	0.808495	1e-05	1e-05	0.075011	0.030401	0.045048	3	229
PI_172874	No	Turkey	Dolmalik	Cucurbita pepo	Gardener, Elbistan Maras.	NA	Landrace	Europe	0.092765	1e-05	0.046289	0.009013	0.411321	0.074324	1e-05	0.143737	1e-05	0.222522	3	277
PI_344357	No	Turkey	Kolsus	Cucurbita pepo	NA	NA	Landrace	Europe	1e-05	1e-05	0.013761	0.029917	0.66991	0.025881	1e-05	0.104788	0.019526	0.136187	3	337
PI_175710	No	Turkey	Dolma	Cucurbita pepo	Market, Yozgat, Yozgat.	NA	Landrace	Europe	0.000246	1e-05	0.042481	0.010958	0.531589	1e-05	1e-05	1e-05	1e-05	0.414676	3	366
PI_169450	No	Turkey	Dolmalik	Cucurbita pepo	Seed stores, Kirklareli, Kirklareli.	NA	Landrace	Europe	0.003921	1e-05	0.014072	1e-05	0.619801	1.7e-05	0.016156	0.110366	0.013538	0.222111	3	322
PI_173685	No	Turkey	8646	Cucurbita pepo	Winter type. Seedsman, Malatya, Malatya.	NA	Landrace	Europe	1e-05	1e-05	0.0225	0.062452	0.17062	1e-05	0.020853	0.216874	0.019898	0.486773	1	599
PI_173684	No	Turkey	Dolmalik	Cucurbita pepo	Seedsman, Malatya, Malatya.	NA	Landrace	Europe	0.017894	1e-05	0.021508	0.00342	0.711407	0.022538	0.016403	0.106782	1e-05	0.100028	3	336
PI_169420	No	Turkey	1508	Cucurbita pepo	NA	NA	Landrace	Europe	0.040511	1e-05	1e-05	1e-05	0.799445	1e-05	0.015737	1e-05	0.035318	0.10894	3	260
PI_176547	No	Turkey	9393	Cucurbita pepo	Winter type. Market, Aksehir, Konya.	NA	Landrace	Europe	1e-05	1e-05	0.021127	0.025382	0.198846	0.004366	0.03197	0.207938	0.030103	0.480249	1	600
PI_169422	No	Turkey	Ak Kabak	Cucurbita pepo	Long white type. Market, Korkuteli. Kabak = pumpkin/squash.	NA	Landrace	Europe	1.9e-05	1e-05	1e-05	1e-05	0.696241	1e-05	1e-05	0.05205	0.065033	0.186608	3	315
PI_169472	No	Turkey	Sakiz Kabak	Cucurbita pepo	Kabak = pumpkin/squash. Seed stores, Bursa.	NA	Landrace	Europe	1e-05	1e-05	1e-05	1e-05	0.925932	1e-05	0.015691	1e-05	1e-05	0.058307	3	221
PI_176550	No	Turkey	9543	Cucurbita pepo	Market, Bilecik, Bilecik.	NA	Landrace	Europe	0.039454	1e-05	1e-05	0.020064	0.032132	1e-05	0.134827	0.197528	0.004229	0.571736	1	633
PI_169474	No	Turkey	Sakiz Kabak	Cucurbita pepo	Kabak = pumpkin/squash. Seed store, Bursa.	NA	Landrace	Europe	1e-05	1e-05	1e-05	1e-05	0.938549	1e-05	0.027969	0.026367	0.007056	1e-05	3	217
PI_176552	No	Turkey	9561	Cucurbita pepo	Cooking type.	NA	Landrace	Europe	1e-05	0.017567	0.031465	1e-05	0.663258	0.012832	1.4e-05	0.081594	1e-05	0.193241	3	319
PI_169476	No	Turkey	Kara Kabak	Cucurbita pepo	Kabak = pumpkin/squash. Seed exhibit, Adapazari, Kocaeli.	NA	Landrace	Europe	1e-05	1e-05	0.001237	1e-05	0.998683	1e-05	1e-05	1e-05	1e-05	1e-05	3	203
PI_169477	No	Turkey	Dolmalik	Cucurbita pepo	Originally from Dortyol.	NA	Landrace	Europe	1e-05	1e-05	0.02713	0.010383	0.850356	1e-05	0.003095	0.041928	1e-05	0.067068	3	241
PI_169478	No	Turkey	3822A	Cucurbita pepo	NA	NA	Landrace	Europe	1e-05	1e-05	0.021492	1e-05	0.452023	1e-05	0.019478	1e-05	0.01693	0.490027	3	354
PI_171621	No	Turkey	6585	Cucurbita pepo	Sweet type.	NA	Landrace	Europe	1e-05	1e-05	1e-05	1e-05	0.99991	1e-05	1e-05	1e-05	1e-05	1e-05	3	204
PI_171622	No	Turkey	Dolmalik	Cucurbita pepo	Seed dealer, Kastamonu, Kastamonu.	NA	Landrace	Europe	1e-05	1e-05	0.024203	1e-05	0.576773	0.009088	0.039029	0.108189	0.03552	0.207169	3	316
PI_171623	No	Turkey	6712	Cucurbita pepo	Sweet type. Seed dealer, Samsun, Samsun.	NA	Landrace	Europe	1e-05	0.007355	0.021028	1e-05	0.051379	0.03919	0.0022	0.285742	0.052306	0.54078	1	604
PI_171625	No	Turkey	6789	Cucurbita pepo	Sweet type. Seedsman, Amasya, Amasya.	NA	Landrace	Europe	1e-05	1e-05	0.008811	1e-05	1e-05	1e-05	0.002901	0.132581	0.031765	0.823892	1	580
PI_177370	No	Turkey	Dolmalik	Cucurbita pepo	NA	NA	Landrace	Europe	1e-05	0.018931	0.007216	1e-05	0.887037	1e-05	1e-05	0.036879	1e-05	0.049887	3	244
PI_177372	No	Turkey	Dolmalik	Cucurbita pepo	NA	NA	Landrace	Europe	0.001643	1e-05	1e-05	0.000743	0.636606	0.020728	0.02498	0.093986	0.003211	0.218083	3	323
PI_177374	No	Turkey	Cegirdigi	Cucurbita pepo	NA	NA	Landrace	Europe	1e-05	0.061621	1e-05	1e-05	0.028304	0.052097	0.003949	0.146744	0.024098	0.683157	1	618
PI_175704	No	Turkey	Pumaha	Cucurbita pepo	Sweet type pumpkin.	NA	Landrace	Europe	0.009229	1e-05	0.007232	0.000798	0.855852	0.00048	1e-05	1e-05	0.004524	0.121854	3	252
PI_177376	No	Turkey	Bal	Cucurbita pepo	NA	NA	Landrace	Europe	1e-05	0.010455	1e-05	0.033557	0.042329	0.045605	1e-05	0.185992	1e-05	0.682022	1	620
PI_230181	No	Turkey	NA	Cucurbita pepo	Fruits globose, sharply ribbed; color dark green, 3.5 inches in diameter; flesh light orange, about 0.66 inch thick.	NA	Landrace	Europe	1e-05	1e-05	0.881622	1e-05	0.027438	0.04036	1e-05	1e-05	0.05052	1e-05	2	465
PI_175707	No	Turkey	6048	Cucurbita pepo	NA	NA	Landrace	Europe	1e-05	1e-05	1e-05	1e-05	0.99991	1e-05	1e-05	1e-05	1e-05	1e-05	3	206
PI_165047	No	Turkey	Dolma kabagi	Cucurbita pepo	Pumpkin.	NA	Landrace	Europe	0.060201	1e-05	1e-05	0.015665	0.579744	1e-05	0.062737	0.144769	0.012039	0.124815	3	285
PI_175709	No	Turkey	Dolma	Cucurbita pepo	Market, Yozgat, Yozgar.	NA	Landrace	Europe	1e-05	1e-05	0.005044	1e-05	0.413446	1e-05	0.048764	0.003742	0.005875	0.52309	3	352
PI_169448	No	Turkey	Sakiz Kabagi	Cucurbita pepo	Sakiz Kabagi = vegetable marrow pumpkin. Agricultural school, Cayirova, Kocaeli.	NA	Landrace	Europe	1e-05	1e-05	1e-05	1e-05	0.99991	1e-05	1e-05	1e-05	1e-05	1e-05	3	209
PI_179268	No	Turkey	Skiz	Cucurbita pepo	NA	NA	Landrace	Europe	0.018074	0.010534	0.016943	1e-05	0.858482	1e-05	1e-05	1e-05	1e-05	0.095916	3	251
PI_175712	No	Turkey	9146	Cucurbita pepo	Dark colored type. Seed dealer, Kayseri, Kayseri.	NA	Landrace	Europe	0.010096	0.020013	0.027123	0.004266	0.219407	1e-05	0.042222	0.196714	0.07098	0.409168	1	590
PI_175713	No	Turkey	9544	Cucurbita pepo	NA	NA	Landrace	Europe	1e-05	1e-05	0.049279	0.014339	0.328039	1e-05	0.016111	0.252155	0.023526	0.316522	1	652
PI_167042	No	Turkey	Kabak	Cucurbita pepo	Kabak = pumpkin/squash.	NA	Landrace	Europe	0.079719	1e-05	0.044609	0.002732	0.597049	0.015024	0.041626	0.052753	0.157483	0.008995	3	339
PI_176532	No	Turkey	9564	Cucurbita pepo	Yellow type pumpkin.	NA	Landrace	Europe	0.024051	1e-05	0.001192	1e-05	0.163364	1e-05	0.052127	0.210974	0.04338	0.504882	1	601
PI_176533	No	Turkey	8811	Cucurbita pepo	Sweet type pumpkin.	NA	Landrace	Europe	0.009065	1e-05	0.001787	1e-05	0.733732	1e-05	1e-05	1e-05	0.071009	0.184356	3	301
PI_176535	No	Turkey	8857	Cucurbita pepo	NA	NA	Landrace	Europe	1e-05	1e-05	0.003215	0.009246	1e-05	1e-05	0.045926	0.125124	0.029208	0.787241	1	579
PI_167199	No	Turkey	Kabak	Cucurbita pepo	Kabak = pumpkin/squash.	NA	Landrace	Europe	1e-05	1e-05	1e-05	1e-05	0.99991	1e-05	1e-05	1e-05	1e-05	1e-05	3	211
PI_176536	No	Turkey	Bal	Cucurbita pepo	NA	NA	Landrace	Europe	0.00741	0.278296	0.034859	0.008516	0.125795	0.046638	0.006637	0.103629	0.020696	0.367524	1	645
PI_176537	No	Turkey	Sakiz	Cucurbita pepo	NA	NA	Landrace	Europe	0.011458	1e-05	0.002331	0.038651	0.336994	0.064637	1e-05	0.13637	0.008438	0.401101	1	662
PI_176538	No	Turkey	Dolma	Cucurbita pepo	Seed dealer, Sivas, Sivas.	NA	Landrace	Europe	0.024657	1e-05	0.03113	1e-05	0.46108	1e-05	1e-05	1e-05	1e-05	0.483072	3	355
PI_176539	No	Turkey	8997	Cucurbita pepo	Seed dealer, Sivas, Sivas.	NA	Landrace	Europe	0.021294	1e-05	0.024754	1e-05	0.019519	0.031888	0.068806	0.139765	0.015732	0.678222	1	621
PI_169414	No	Turkey	3387	Cucurbita pepo	Squash. Black type. Received as Cucurbita moschata.	NA	Landrace	Europe	1e-05	1e-05	0.038984	1e-05	0.061744	1e-05	0.105462	0.328881	1e-05	0.464879	1	611
PI_169416	No	Turkey	Sakiz Kabak	Cucurbita pepo	Kabak = pumpkin/squash. From agricultural school, Bornova, Izmir.	NA	Landrace	Europe	0.0475	1e-05	1e-05	0.050969	0.772878	0.004336	1e-05	0.02799	0.096287	1e-05	3	263
PI_169417	No	Turkey	1461	Cucurbita pepo	Seed store, Manisa, Manisa.	NA	Landrace	Europe	0.060571	0.04428	0.005576	1e-05	0.533516	0.032441	0.013853	0.167901	0.018441	0.123412	3	283
PI_176545	No	Turkey	Kolsus	Cucurbita pepo	NA	NA	Landrace	Europe	0.033014	1e-05	1e-05	0.004443	0.536979	1e-05	0.024682	0.147581	0.020781	0.23249	3	281
PI_169467	No	Turkey	3290	Cucurbita pepo	Originally from Istanbul.	NA	Landrace	Europe	1e-05	0.016249	0.043291	0.01189	1e-05	0.006514	0.015397	0.196675	0.026007	0.683958	1	625
PI_169468	No	Turkey	3333	Cucurbita pepo	Large type.	NA	Landrace	Europe	1e-05	1e-05	0.021166	0.011822	0.055347	1e-05	0.098982	0.316405	1e-05	0.496238	1	610
PI_169469	No	Turkey	Sakiz Kabak	Cucurbita pepo	Kabak = pumpkin/squash.	NA	Landrace	Europe	1e-05	1e-05	0.013067	1e-05	0.873621	1e-05	0.006239	1e-05	0.035276	0.071748	3	243
PI_176548	No	Turkey	Sakiz	Cucurbita pepo	NA	NA	Landrace	Europe	1e-05	1e-05	1e-05	0.024977	0.822957	0.000694	1e-05	0.070761	1e-05	0.080562	3	254
PI_169473	No	Turkey	3517	Cucurbita pepo	Originally from Ulu Dag.	NA	Landrace	Europe	1e-05	1e-05	0.005631	1e-05	0.149724	1e-05	0.072577	0.27674	0.020758	0.47453	1	596
PI_267758	No	Turkey	Saki Kabagi	Cucurbita pepo	Plants vigorous, early maturing; half-runner; leaves 15-pointed; fruit cream colored, 12 ridged, 14 by 4 inches; flesh deep. Some resistance to powdery mildew.	NA	Uncertain improvement status	Europe	1e-05	0.00316	0.003948	1e-05	0.927245	0.002792	0.015153	0.037758	1e-05	0.009914	3	219
PI_169475	No	Turkey	Sakiz Kabak	Cucurbita pepo	Kabak = pumpkin/squash. Seed exhibit, Adapazari, Kocaeli.	NA	Landrace	Europe	1e-05	1e-05	1e-05	1e-05	0.990863	1e-05	1e-05	0.009057	1e-05	1e-05	3	202
PI_178896	No	Turkey	5579	Cucurbita pepo	NA	NA	Landrace	Europe	0.038349	0.013612	0.013201	0.050304	0.611419	0.043957	0.04302	0.007665	0.040329	0.138144	3	288
PI_183678	No	Turkey	Adana	Cucurbita pepo	NA	NA	Landrace	Europe	0.086412	1e-05	0.047953	1e-05	0.674307	1e-05	0.014633	0.060552	0.013167	0.102946	3	329
PI_176959	No	Turkey	Dolma	Cucurbita pepo	NA	NA	Landrace	Europe	0.066095	1e-05	0.427408	1e-05	0.290286	0.006538	0.042624	0.055547	1e-05	0.111473	3	391
PI_185033	No	Turkey	10912	Cucurbita pepo	Dark colored type.	NA	Landrace	Europe	0.00264	0.019963	0.014297	1e-05	0.154748	0.147582	0.074417	0.232022	1e-05	0.354312	1	666
PI_176962	No	Turkey	Gomleksiz	Cucurbita pepo	Seeds without hull and oily. Seed dealer, Konya, Konya.	NA	Landrace	Europe	0.006808	0.024475	1e-05	1e-05	0.334898	0.023249	0.031318	0.277833	1e-05	0.301388	1	655
PI_176964	No	Turkey	Sakiz	Cucurbita pepo	NA	NA	Landrace	Europe	1e-05	1e-05	0.014762	1e-05	0.836879	1e-05	1e-05	0.039844	0.053116	0.055349	3	240
PI_176965	No	Turkey	Bal	Cucurbita pepo	NA	NA	Landrace	Europe	1e-05	1e-05	0.062117	0.01553	0.053479	0.010328	1e-05	0.376327	0.069103	0.413087	1	606
PI_177369	No	Turkey	4394	Cucurbita pepo	NA	NA	Landrace	Europe	1e-05	1e-05	0.014655	1e-05	0.774126	1e-05	1e-05	1e-05	0.044852	0.166307	3	302
PI_171627	No	Turkey	Erken	Cucurbita pepo	NA	NA	Landrace	Europe	0.000847	0.007295	0.017232	1e-05	0.784107	1e-05	1e-05	0.007901	0.05319	0.129399	3	261
PI_171628	No	Turkey	6962	Cucurbita pepo	Dark-colored type.	NA	Landrace	Europe	1e-05	1e-05	0.030565	0.047719	0.03569	1e-05	0.043747	0.153455	0.017744	0.67105	1	622
PI_177375	No	Turkey	Bal	Cucurbita pepo	NA	NA	Landrace	Europe	0.043373	0.094476	0.055576	0.024876	0.21665	0.08118	0.012695	0.084444	0.063983	0.322748	1	647
PI_171631	No	Turkey	7059	Cucurbita pepo	Sweet type.	NA	Landrace	Europe	1e-05	1e-05	0.023392	1e-05	0.740034	0.004701	0.001263	0.051159	0.028438	0.150983	3	333
PI_169443	No	Turkey	Tezce	Cucurbita pepo	Early type. From garden of Ali Kucuk Kirca, Bergama.	NA	Landrace	Europe	0.045432	1e-05	0.019004	0.005258	0.90357	1e-05	0.021942	1e-05	1e-05	0.004753	3	214
PI_169459	No	Turkey	2867	Cucurbita pepo	NA	NA	Landrace	Europe	1e-05	1e-05	0.059765	1e-05	0.401963	1e-05	0.000398	1e-05	0.013025	0.524799	3	351
PI_178897	No	Turkey	5585	Cucurbita pepo	Fruit dark colored.	NA	Landrace	Europe	1e-05	1e-05	0.043043	0.038128	0.226117	0.04357	0.051703	0.15492	0.008094	0.434405	1	592
PI_178898	No	Turkey	9659	Cucurbita pepo	NA	NA	Landrace	Europe	0.000384	0.028567	0.020454	0.007419	0.211666	0.00117	0.044683	0.184246	0.009319	0.492091	1	602
PI_172857	No	Turkey	Dolma	Cucurbita pepo	NA	NA	Landrace	Europe	0.025427	0.026013	0.010614	1e-05	0.717704	0.038409	1e-05	1e-05	0.004645	0.177158	3	300
PI_172858	No	Turkey	7434	Cucurbita pepo	Fruit dark colored.	NA	Landrace	Europe	0.054483	0.040414	0.007308	1e-05	1e-05	1e-05	0.030744	0.159432	0.0237	0.683888	1	624
PI_179269	No	Turkey	5015	Cucurbita pepo	NA	NA	Landrace	Europe	0.006736	1e-05	0.016343	1e-05	0.586955	1e-05	0.024931	0.055777	0.0522	0.257028	3	360
PI_179270	No	Turkey	5911	Cucurbita pepo	NA	NA	Landrace	Europe	0.009042	1e-05	0.047072	0.03722	0.192042	0.029679	0.07575	0.214392	1e-05	0.394783	1	591
PI_179271	No	Turkey	6033	Cucurbita pepo	NA	NA	Landrace	Europe	1e-05	1e-05	0.005641	0.034908	0.646738	1e-05	0.008929	0.085239	0.011195	0.207319	3	321
PI_169453	No	Turkey	Sakiz Kabak	Cucurbita pepo	Kabak = pumpkin/squash. Seed store, Babaeski, Kirklareli.	NA	Landrace	Europe	1e-05	1e-05	0.015348	1e-05	0.73862	0.025586	0.004956	0.071996	0.019268	0.124195	3	331
PI_179274	No	Turkey	10105	Cucurbita pepo	Common type.	NA	Landrace	Europe	1e-05	1e-05	0.018735	1e-05	0.835938	1e-05	0.024454	1e-05	0.03311	0.087713	3	258
PI_176534	No	Turkey	Amasya	Cucurbita pepo	Seed dealer, Amasya. Originally from Amasya, Amasya.	NA	Landrace	Europe	1e-05	0.065378	0.069758	1.1e-05	0.825728	1e-05	1e-05	0.014718	1e-05	0.024368	3	230
PI_172870	No	Turkey	8232	Cucurbita pepo	Seed dealer, Urfa, Urfa.	NA	Landrace	Europe	0.037189	1e-05	0.014572	1e-05	0.898978	0.00034	1e-05	1e-05	1e-05	0.048871	3	233
PI_169458	No	Turkey	Sakiz Kabak	Cucurbita pepo	Kabak = pumpkin/squash.	NA	Landrace	Europe	0.063727	1e-05	0.02256	0.012678	0.381849	1e-05	0.02053	1e-05	0.018483	0.480143	3	350
PI_267759	No	Turkey	Murdurlugu	Cucurbita pepo	Plants vigorous, bush type, early maturing; fruit cream orange, oblong, 10-ridged, 18 by 4 inches; flesh deep; seed cavity small. Susceptible to powdery mildew.	NA	Uncertain improvement status	Europe	0.013603	1e-05	0.00341	1e-05	0.469168	0.013177	0.016861	1e-05	0.021718	0.462033	3	358
PI_169460	No	Turkey	Sakiz Kabak	Cucurbita pepo	Kabak = pumpkin/squash. Mayor's garden, Canakkale.	NA	Landrace	Europe	0.003016	1e-05	0.006578	1e-05	0.954696	1e-05	0.012942	1e-05	0.022718	1e-05	3	197
PI_169461	No	Turkey	2948	Cucurbita pepo	NA	NA	Landrace	Europe	0.062555	0.023571	0.052485	1e-05	0.322586	1e-05	0.014066	0.028228	0.060329	0.436161	3	348
PI_172875	No	Turkey	Mentise	Cucurbita pepo	Seed dealer, Elazig, Elazig.	NA	Landrace	Europe	1e-05	0.021544	0.032975	0.030172	0.351252	1e-05	0.017434	0.206233	0.008648	0.331723	1	650
PI_169463	No	Turkey	3103	Cucurbita pepo	NA	NA	Landrace	Europe	1e-05	1e-05	0.024846	0.025512	0.105915	0.037886	0.077961	0.220444	1e-05	0.507407	1	598
PI_169464	No	Turkey	Kara Kabak	Cucurbita pepo	Black type. Kabak = pumpkin/squash.	NA	Landrace	Europe	0.037352	1e-05	0.005964	1e-05	0.08368	1e-05	0.081832	0.153595	1e-05	0.637537	1	634
PI_173683	No	Turkey	7984	Cucurbita pepo	Sweet type.	NA	Landrace	Europe	0.04173	1e-05	1e-05	0.075823	0.186162	1e-05	1e-05	0.051186	0.041293	0.603766	1	615
PI_169465	No	Turkey	Dolmalik	Cucurbita pepo	Originally from Calova.	NA	Landrace	Europe	1e-05	1e-05	0.001302	1e-05	0.689786	0.013795	0.056905	0.039589	0.038983	0.15961	3	314
PI_176546	No	Turkey	Dolmalik	Cucurbita pepo	Market, Aksehir, Konya.	NA	Landrace	Europe	0.038698	1e-05	1e-05	1e-05	0.722253	1e-05	0.016899	0.060164	0.007734	0.154212	3	334
PI_182199	No	Turkey	Dolmalik	Cucurbita pepo	NA	NA	Landrace	Europe	1e-05	1e-05	0.014643	1e-05	0.665786	1e-05	0.035581	1e-05	0.022497	0.261443	3	308
PI_182200	No	Turkey	10442	Cucurbita pepo	NA	NA	Landrace	Europe	1e-05	0.032979	0.027951	1e-05	0.084798	1e-05	0.008654	0.248308	1e-05	0.597269	1	630
PI_169423	No	Turkey	Bahce	Cucurbita pepo	NA	NA	Landrace	Europe	1e-05	1e-05	1e-05	0.023501	0.800259	1e-05	0.023671	1e-05	0.059032	0.093487	3	259
PI_182202	No	Turkey	10575	Cucurbita pepo	NA	NA	Landrace	Europe	0.048603	1e-05	1e-05	1e-05	0.90881	1e-05	1e-05	1e-05	1e-05	0.042517	3	234
PI_171633	No	Turkey	Dolmalik	Cucurbita pepo	NA	NA	Landrace	Europe	1e-05	0.00311	0.007666	0.001854	0.854309	1e-05	0.022717	0.001996	0.008677	0.099651	3	250
PI_171635	No	Turkey	Dolmalik	Cucurbita pepo	Seed store, Kars, Kars. Originally from Amasya.	NA	Landrace	Europe	1e-05	1e-05	1e-05	0.024449	0.807801	0.00314	0.02066	0.039802	0.018973	0.085145	3	255
PI_171636	No	Turkey	7041	Cucurbita pepo	NA	NA	Landrace	Europe	1e-05	1e-05	1e-05	1e-05	1e-05	1e-05	0.017788	0.146475	0.034733	0.800944	1	581
PI_185032	No	Turkey	10910	Cucurbita pepo	Sweet type.	NA	Landrace	Europe	1e-05	1e-05	0.020753	1e-05	0.581286	0.001702	0.038687	1e-05	0.022409	0.335124	3	363
PI_206426	No	Turkey	879	Cucurbita pepo	NA	NA	Landrace	Europe	0.03957	0.020797	0.012875	1e-05	0.610061	1e-05	1e-05	1e-05	0.060343	0.256314	3	362
PI_179267	No	Turkey	Dolmalik	Cucurbita pepo	NA	NA	Landrace	Europe	0.015318	1e-05	0.010667	1e-05	0.709605	1e-05	0.025671	0.069502	0.041011	0.128196	3	335
PI_172860	No	Turkey	7519	Cucurbita pepo	Sweet type.	NA	Landrace	Europe	0.012177	1e-05	0.038956	1e-05	0.513296	0.017573	1e-05	0.015633	0.033349	0.368986	3	368
PI_172861	No	Turkey	Dolmalik	Cucurbita pepo	NA	NA	Landrace	Europe	1e-05	1e-05	0.005732	1e-05	0.661433	0.032412	0.017951	0.021158	0.036677	0.224607	3	311
PI_344359	No	Turkey	Gririt	Cucurbita pepo	NA	NA	Landrace	Europe	1e-05	1e-05	1e-05	1e-05	0.280554	0.023643	0.043674	1e-05	0.652069	1e-05	5	176
PI_171626	No	Turkey	Dolmalik	Cucurbita pepo	Seedsman, Tokat, Tokat.	NA	Landrace	Europe	0.000357	1e-05	1e-05	1e-05	0.742127	0.011463	1e-05	0.065555	0.032205	0.148252	3	332
PI_199015	No	Turkey	Selection from PI 172853	Cucurbita pepo	Separation from Cucurbita maxima, PI 172853.	NA	Landrace	Europe	0.037137	1e-05	1e-05	1e-05	0.014628	1e-05	0.049074	0.216393	0.135312	0.547416	1	626
PI_171629	No	Turkey	6976	Cucurbita pepo	Seed dealer Unye, Ordu.	NA	Landrace	Europe	0.002211	0.025199	0.034668	1e-05	0.047562	0.004121	1e-05	0.134862	0.05828	0.693076	1	623
PI_204694	No	Turkey	179	Cucurbita pepo	Kayseri bazaar.	NA	Landrace	Europe	1e-05	1e-05	0.01006	1e-05	0.702064	1e-05	1e-05	1e-05	0.039672	0.248144	3	306
PI_172871	No	Turkey	Dolmalik	Cucurbita pepo	Seed dealer, Urfa, Urfa.	NA	Landrace	Europe	0.01504	1e-05	0.003124	1e-05	0.869706	1e-05	0.025051	0.048712	0.008523	0.029814	3	238
PI_172872	No	Turkey	Dolma	Cucurbita pepo	NA	NA	Landrace	Europe	0.055906	1e-05	0.385059	1e-05	0.240248	0.034143	0.076559	0.048966	0.003616	0.155483	3	392
PI_172873	No	Turkey	Dolma	Cucurbita pepo	Seedsman, Maras, Maras.	NA	Landrace	Europe	0.039919	1e-05	0.133868	1e-05	0.24473	0.007714	0.058357	0.105331	0.016662	0.3934	1	648
PI_172406	No	Turkey	Dolmalik	Cucurbita pepo	Agricultural agent, Bayburt, Gumusane.	NA	Landrace	Europe	0.01956	1e-05	0.004456	1e-05	0.67749	0.005808	0.015147	1e-05	1e-05	0.277499	3	309
PI_344356	No	Turkey	Kolu Kara Kabak	Cucurbita pepo	Kabak = pumpkin/squash.	NA	Landrace	Europe	0.001035	0.054685	0.000984	0.000664	0.3106	0.059081	1e-05	0.210787	0.04095	0.321204	1	660
PI_173680	No	Turkey	7873	Cucurbita pepo	Governer's garden, Hakari, Hakari.	NA	Landrace	Europe	1e-05	1e-05	0.065808	0.001021	0.395327	1e-05	1e-05	0.252822	1e-05	0.284971	1	653
PI_173681	No	Turkey	Yumurta	Cucurbita pepo	Fruits 2 inches in diameter. Many fruit per plant. Received as Cucurbita pepo var. ovifera.	NA	Landrace	Europe	1e-05	1e-05	0.887574	0.005422	1e-05	0.054203	0.023938	0.028813	1e-05	1e-05	2	467
PI_176544	No	Turkey	9275	Cucurbita pepo	Grain market, Ereyli, Konya. Originally from Mersin, Icel.	NA	Landrace	Europe	0.01098	1e-05	1e-05	1e-05	0.101278	0.028322	0.061892	0.312896	1e-05	0.484593	1	609
PI_344358	No	Turkey	Kose Seker	Cucurbita pepo	NA	NA	Landrace	Europe	0.034716	1e-05	0.284016	1e-05	0.4546	0.026168	0.047226	0.018984	1e-05	0.134259	3	387
PI_172866	No	Turkey	7792	Cucurbita pepo	Sweet type. From seed dealer, Van, Van.	NA	Landrace	Europe	1e-05	1e-05	1e-05	1e-05	0.99991	1e-05	1e-05	1e-05	1e-05	1e-05	3	207
PI_172867	No	Turkey	Dolmalik	Cucurbita pepo	From seed dealer, Mardin, Mardin.	NA	Landrace	Europe	0.010217	1e-05	0.023098	1e-05	0.06672	0.02219	0.030604	0.189965	0.078882	0.578304	1	629
PI_172868	No	Turkey	8129	Cucurbita pepo	Fruit dark-colored. From seed dealer, Mardin, Mardin.	NA	Landrace	Europe	1e-05	1e-05	1e-05	1e-05	0.99991	1e-05	1e-05	1e-05	1e-05	1e-05	3	208
PI_169456	No	Turkey	Kestane	Cucurbita pepo	Seed store, Luleburgaz, Kirklareli.	NA	Landrace	Europe	1e-05	1e-05	0.025001	1e-05	0.180552	0.056497	0.046631	0.307669	0.114664	0.268956	1	665
PI_176549	No	Turkey	Dolmalik	Cucurbita pepo	Seed dealer, Kutahya, Kutahya.	NA	Landrace	Europe	1e-05	0.01249	1e-05	1e-05	0.79048	0.013014	0.030426	0.043898	1e-05	0.109652	3	253
PI_182203	No	Turkey	10653	Cucurbita pepo	NA	NA	Landrace	Europe	0.085036	1e-05	0.147587	0.007789	0.464304	0.042135	0.009252	1e-05	1e-05	0.243866	3	370
PI_204696	No	Turkey	423	Cucurbita pepo	Malatya bazaar.	NA	Landrace	Europe	0.006533	1e-05	0.033121	1e-05	0.674233	1e-05	1.7e-05	1e-05	1e-05	0.286046	3	310
PI_344354	No	Turkey	Sakiz	Cucurbita pepo	NA	NA	Landrace	Europe	1e-05	0.007713	0.006688	1e-05	0.890262	1e-05	1e-05	0.015565	0.026081	0.05365	3	246
PI_175708	No	Turkey	6066	Cucurbita pepo	Sweet type.	NA	Landrace	Europe	0.039998	1e-05	0.075716	0.029197	0.546951	0.009272	0.045635	0.012417	1e-05	0.240793	3	359
PI_204698	No	Turkey	432	Cucurbita pepo	Malatya bazaar.	NA	Landrace	Europe	1e-05	1e-05	0.031651	1e-05	0.457769	0.065646	0.012424	0.044825	0.024725	0.362929	3	375
PI_206956	No	Turkey	741	Cucurbita pepo	Bazaar, Giresun.	NA	Landrace	Europe	1e-05	1e-05	1e-05	0.045818	0.917669	1e-05	1e-05	1e-05	1e-05	0.036443	3	222
PI_206957	No	Turkey	945	Cucurbita pepo	Harasi Farm, Eskisehir.	NA	Landrace	Europe	1e-05	1e-05	0.030467	1e-05	0.744108	1e-05	1e-05	0.016873	0.033407	0.175095	3	303
PI_182201	No	Turkey	Dolma	Cucurbita pepo	NA	NA	Landrace	Europe	0.027177	1e-05	0.010594	1e-05	0.516942	0.053775	0.008221	0.166542	0.014322	0.202407	3	282
PI_182198	No	Turkey	Kundur	Cucurbita pepo	NA	NA	Landrace	Europe	0.074092	0.006258	0.159278	1e-05	0.420054	0.048073	0.007166	0.009171	1e-05	0.275888	3	369
PI_175714	No	Turkey	Acir	Cucurbita pepo	NA	NA	Landrace	Europe	0.036285	1e-05	1e-05	1e-05	0.842489	1e-05	0.050167	0.028966	1e-05	0.042043	3	239
PI_406678	No	Turkey	NA	Cucurbita pepo	Thin skinned (skinless).	NA	Landrace	Europe	1e-05	1e-05	1e-05	1e-05	0.114723	0.008898	0.095618	0.183904	0.006129	0.590687	1	636
PI_204697	No	Turkey	431	Cucurbita pepo	Malatya bazaar.	NA	Landrace	Europe	1e-05	0.015075	0.017781	1e-05	0.619813	1e-05	0.045215	0.049684	0.041078	0.211324	3	318
PI_267756	No	Turkey	Dolma	Cucurbita pepo	Accession PI 174167 received as mixture of Cucumis sativus and Cucurbita pepo - C. pepo given new number. Plants vigorous, midseason variety, much branched; vines to 20 feet long; fruit deep tan, bowling pin or pear shaped; rind hard; good keeper, excellent quality.	NA	Uncertain improvement status	Europe	1e-05	1e-05	0.323715	1e-05	0.355698	0.053786	0.016228	0.021537	0.028532	0.200474	3	395
PI_204695	No	Turkey	419	Cucurbita pepo	Malatya bazaar.	NA	Landrace	Europe	1e-05	1e-05	0.004542	1e-05	0.603079	1e-05	1e-05	1e-05	1e-05	0.392309	3	365
PI_344070	No	Turkey	22374	Cucurbita pepo	Cultivated for edible seeds.	NA	Cultivated material	Europe	0.005893	1e-05	0.042601	0.022277	0.065037	1e-05	0.027696	0.269542	0.010665	0.556269	1	632
PI_176543	No	Turkey	Dolma	Cucurbita pepo	Seed handler, Nigde, Nigde.	NA	Landrace	Europe	1e-05	1e-05	0.019791	1e-05	0.889004	1e-05	1e-05	0.081721	0.009424	1e-05	3	223
PI_204693	No	Turkey	176	Cucurbita pepo	Kayseri bazaar.	NA	Landrace	Europe	0.019021	1e-05	0.020821	0.016498	0.891926	1e-05	0.017111	0.004665	0.029928	1e-05	3	216
PI_406679	No	Turkey	NA	Cucurbita pepo	Thin skinned (skinless).	NA	Landrace	Europe	1e-05	1e-05	0.02087	0.015407	0.140938	1e-05	0.117644	0.273627	1e-05	0.431475	1	594
PI_176541	No	Turkey	Sakiz	Cucurbita pepo	NA	NA	Landrace	Europe	0.00822	1e-05	0.023759	1e-05	0.484588	0.035939	1e-05	1e-05	0.011219	0.436235	3	357
PI_344071	No	Turkey	22696	Cucurbita pepo	Eaten immature.	NA	Cultivated material	Europe	0.074937	0.010174	0.080135	0.029785	0.565579	0.050414	0.012951	0.010747	1e-05	0.165267	3	290
PI_169457	No	Turkey	Sakiz Kabak	Cucurbita pepo	Kabak = pumpkin/squash. Seed store, Luleburgaz, Kirklareli.	NA	Landrace	Europe	1e-05	1e-05	0.013397	1e-05	0.625944	0.02275	0.03553	0.078197	0.041081	0.183072	3	317
PI_207479	No	Afghanistan	12693	Cucurbita pepo	Small, round, light yellow. Received as Cucurbita moschata.	NA	Landrace	Asia	1e-05	1e-05	0.080956	1e-05	0.149311	1e-05	0.687624	1e-05	1e-05	0.082049	8	60
PI_223773	No	Afghanistan	Shir-Kadoo	Cucurbita pepo	(Kadoo, Kadu, Kaddu = pumpkin/squash.)	NA	Landrace	Asia	1e-05	1e-05	1e-05	1e-05	1e-05	1e-05	0.99991	1e-05	1e-05	1e-05	8	52
PI_135394	No	Afghanistan	5055	Cucurbita pepo	Fruit flattened, 5 by 1.75 inches; orange with indented ribs; faintly scalloped edges.	NA	Landrace	Asia	1e-05	0.013224	0.675231	0.056208	1e-05	0.053666	0.024143	0.032339	1e-05	0.145158	2	396
PI_265560	No	Afghanistan	Selection of PI 221923	Cucurbita pepo	Received as Cucurbita maxima. Plants growing at the NCRPIS and NERPIS. This is the C. pepo component of PI 221923 (C. maxima). Vine medium in size; leaves small; fruit seven inches, globose; skin light to medium green with orange.	NA	Landrace	Asia	1e-05	1e-05	1e-05	1e-05	1e-05	1e-05	0.99991	1e-05	1e-05	1e-05	8	54
PI_268381	No	Afghanistan	288	Cucurbita pepo	Kabul bazaar.	NA	Landrace	Asia	1e-05	1e-05	1e-05	1e-05	1e-05	1e-05	0.99991	1e-05	1e-05	1e-05	8	51
PI_256064	No	Afghanistan	Mashidi pumpkin	Cucurbita pepo	NA	NA	Uncertain improvement status	Asia	1e-05	1e-05	0.021886	1e-05	0.539927	1e-05	0.055717	1e-05	0.046542	0.335879	3	379
PI_222100	No	Afghanistan	Kadoo-i-Kabuli (Kabuli's Pumpkin)	Cucurbita pepo	They sow its seeds in first spring. Irrigated. Round, sweet, inside color white, outside light green with white points. People cook it as a food. (Kadu, Kaddu, Kadoo = pumpkin/squash.)	NA	Landrace	Asia	1e-05	1e-05	1e-05	1e-05	1e-05	1e-05	0.99991	1e-05	1e-05	1e-05	8	57
PI_256063	No	Afghanistan	NA	Cucurbita pepo	NA	NA	Uncertain improvement status	Asia	1e-05	0.006252	0.044966	1e-05	0.532183	0.00744	0.04844	1e-05	0.069768	0.290921	3	377
PI_418966	No	China	Hua Yeh	Cucurbita pepo	Calabash. Bush small, short internodes. Fruit green, flat, round. Early maturity, high yield.	NA	Cultivated material	Asia	0.99991	1e-05	1e-05	1e-05	1e-05	1e-05	1e-05	1e-05	1e-05	1e-05	7	68
PI_427095	No	China	NA	Cucurbita pepo	Leaves pubescent. Fruit oblong, dark green. Growth period 50 to 60 days.	NA	Uncertain improvement status	Asia	0.022541	1e-05	1e-05	0.063299	0.607476	1e-05	0.254864	1e-05	1e-05	0.051769	3	345
PI_157099	No	China	Duck	Cucurbita pepo	Cushaw. Received as C. moschata, reid 07/15/1960.	NA	Landrace	Asia	0.004746	1e-05	0.015555	0.03959	0.346762	0.009174	0.493103	0.09104	1e-05	1e-05	3	343
PI_136448	No	China	Summer Squash	Cucurbita pepo	Summer squash.	NA	Landrace	Asia	1e-05	0.023734	1e-05	1e-05	0.770439	0.028286	0.079591	0.006654	0.045006	0.04626	3	262
PI_291254	No	China	174	Cucurbita pepo	Early Chinese white vegetable marrow.	NA	Landrace	Asia	0.023309	1e-05	1e-05	1e-05	0.451987	0.06829	0.261338	0.104628	0.04605	0.044368	3	346
PI_212013	No	Iran	14	Cucurbita pepo	NA	NA	Landrace	Asia	1e-05	0.009371	1e-05	1e-05	0.857418	0.017792	0.046072	0.015856	1e-05	0.053451	3	237
PI_143329	No	Iran	7975	Cucurbita pepo	Fruit flattened 9 inches long, 5 inches in diameter, orange yellow, splotched orange red; a few strong ridges at stem end; flesh 1.25 inches thick, orange, firm, nearly woody, low in sugar. Good keeper.	NA	Landrace	Asia	0.042364	0.056651	0.006385	0.050343	0.006947	0.049392	0.040826	0.062764	0.025676	0.658651	1	586
PI_212000	No	Iran	1	Cucurbita pepo	NA	NA	Landrace	Asia	1e-05	0.05937	1e-05	0.044307	1e-05	1e-05	0.003153	0.08062	1e-05	0.812499	1	583
PI_355054	No	Iran	Mosamai	Cucurbita pepo	Reported to carry mosaic resistance. Received as C. maxima.	NA	Landrace	Asia	1e-05	0.017057	0.010134	1e-05	0.85171	0.026391	0.029156	1e-05	0.018673	0.04685	3	236
PI_227298	No	Iran	14699	Cucurbita pepo	Market, Kazerun.	NA	Landrace	Asia	0.022064	0.018295	1e-05	0.010078	0.522889	0.016663	0.033154	0.021721	0.005	0.350127	3	381
PI_141666	No	Iran	Kaduemasmali	Cucurbita pepo	Fruit globose.	NA	Uncertain improvement status	Asia	1e-05	0.008397	1e-05	0.006791	0.86304	1e-05	0.00854	0.025703	1e-05	0.087488	3	248
PI_212012	No	Iran	13	Cucurbita pepo	NA	NA	Landrace	Asia	1e-05	1e-05	0.007318	0.020339	0.679867	0.014905	1e-05	1e-05	0.021717	0.255814	3	305
PI_223352	No	Iran	Kadoo	Cucurbita pepo	Fruit small, elongate. (Kadoo, Kadu, Kaddu = pumpkin/squash.)	NA	Landrace	Asia	0.038515	1e-05	1e-05	1e-05	0.57559	0.034043	1e-05	1e-05	1e-05	0.351791	3	364
PI_227237	No	Iran	14868	Cucurbita pepo	Color greenish; cooked as a vegetable.	NA	Landrace	Asia	0.024617	0.011115	3.9e-05	0.031315	0.678566	0.022142	0.080447	0.110131	0.004131	0.037496	3	324
PI_223354	No	Iran	Kadoo	Cucurbita pepo	(Kadoo, Kadu, Kaddu = pumpkin/squash.)	NA	Landrace	Asia	0.013359	0.03464	0.020106	0.010935	0.520625	1e-05	0.040164	1e-05	0.036898	0.323253	3	378
PI_143306	No	Iran	7411	Cucurbita pepo	From Koeltz's notes:fruit 10 inches long, 7 inches in diameter, heavily ridged starting at stem end and conspicuous warts over surface. Color "pumpkin red"; netted green and orange; flesh 1.5 inches thick, orange, rather sweet.	NA	Landrace	Asia	0.07232	0.056252	0.014681	0.029011	1e-05	0.043179	0.029184	0.07138	1e-05	0.683974	1	585
PI_222722	No	Iran	Kadoo	Cucurbita pepo	Market, Kermanshah. (Kadoo, Kadu, Kaddu = pumpkin/squash.)	NA	Landrace	Asia	1e-05	1e-05	0.010505	1e-05	0.732408	0.01127	0.001995	1e-05	1e-05	0.243772	3	304
PI_227299	No	Iran	14781	Cucurbita pepo	Market, Kerman.	NA	Landrace	Asia	0.010918	0.024715	0.008206	1e-05	0.540343	0.055196	0.036307	0.004258	1e-05	0.320036	3	382
PI_137896	No	Iran	Kadu	Cucurbita pepo	Kadu = pumpkin/squash.	NA	Landrace	Asia	1e-05	1e-05	0.017023	1e-05	0.483688	0.036238	0.075865	0.060376	0.04628	0.2805	3	372
PI_212014	No	Iran	NA	Cucurbita pepo	Mixture of C. pepo and C. moschata (PI 222760).	NA	Landrace	Asia	0.02592	1e-05	0.028804	1e-05	0.482381	0.028731	0.151827	0.053113	0.07687	0.152334	3	286
PI_226511	No	Iran	Keds	Cucurbita pepo	Market, Ahwaz.	NA	Landrace	Asia	1e-05	0.043835	1e-05	1e-05	0.545505	0.041423	0.04086	0.007818	1e-05	0.320519	3	383
PI_222786	No	Iran	Kadoo	Cucurbita pepo	(Kadoo, Kadu, Kaddu = pumpkin/squash.)	NA	Landrace	Asia	0.037717	0.009317	0.01599	1e-05	0.723881	0.004153	1e-05	1e-05	0.001855	0.207057	3	299
PI_212007	No	Iran	8	Cucurbita pepo	NA	NA	Landrace	Asia	1e-05	0.010315	0.000766	0.001178	0.555979	0.050006	0.115444	0.106909	0.016874	0.142518	3	287
PI_212005	No	Iran	6	Cucurbita pepo	NA	NA	Landrace	Asia	1e-05	1e-05	1e-05	0.010922	0.881088	0.006813	1e-05	0.03042	0.03226	0.038457	3	245
PI_212004	No	Iran	5	Cucurbita pepo	NA	NA	Landrace	Asia	0.039626	0.013066	0.07193	0.037957	0.014138	0.049885	0.12436	0.178922	1e-05	0.470106	1	612
PI_229688	No	Iran	15761	Cucurbita pepo	Market, Sari, Caspian plain.	NA	Landrace	Asia	0.053011	1e-05	0.022904	1e-05	0.343582	1e-05	0.112437	0.101166	0.043184	0.323686	1	659
PI_141660	No	Iran	Kadu	Cucurbita pepo	Kadu = pumpkin/squash. Mixture.	NA	Landrace	Asia	1e-05	0.007541	0.025838	0.060566	0.200978	0.016952	0.302851	0.111706	0.012508	0.26105	1	669
PI_212010	No	Iran	11	Cucurbita pepo	Received as mixture of C. pepo and C. maxima. C. maxima portion assigned PI 265558.	NA	Landrace	Asia	1e-05	0.058195	0.005517	0.002263	1e-05	0.025118	0.075163	0.033464	0.036886	0.763375	1	587
PI_222246	No	Iran	Kadoo	Cucurbita pepo	Market, Tehran. (Kadoo, Kadu, Kaddu = pumpkin/squash.)	NA	Landrace	Asia	0.004604	1e-05	1e-05	0.013067	0.788111	1e-05	1e-05	1e-05	1e-05	0.194159	3	297
PI_296388	No	Iran	NA	Cucurbita pepo	Received as Cucurbita moschata, reid to C. pepo QS 61 03/1980.	NA	Landrace	Asia	1e-05	0.034615	0.011378	0.035651	0.859199	1e-05	0.038826	0.020291	1e-05	1e-05	3	235
PI_212008	No	Iran	9	Cucurbita pepo	NA	NA	Landrace	Asia	0.01534	1e-05	0.019421	1e-05	0.611894	0.013661	0.007901	1e-05	0.039868	0.291884	3	361
PI_222247	No	Iran	1419	Cucurbita pepo	Market, Tehran.	NA	Landrace	Asia	0.02806	0.034187	0.675844	0.05148	1e-05	0.059597	0.014154	0.016544	0.088186	0.031938	2	403
PI_212002	No	Iran	3	Cucurbita pepo	NA	NA	Landrace	Asia	0.031142	0.004365	0.038486	0.070957	0.123138	0.039892	0.091214	0.072023	0.101754	0.427029	1	613
PI_212003	No	Iran	4	Cucurbita pepo	NA	NA	Landrace	Asia	1e-05	1e-05	0.019897	0.045748	0.078697	0.026948	0.250558	0.055446	0.039957	0.48273	1	614
PI_229531	No	Iran	15377	Cucurbita pepo	NA	NA	Landrace	Asia	0.039713	0.010439	0.002736	0.040557	0.428736	0.007836	1e-05	1e-05	0.023675	0.446289	3	353
PI_212006	No	Iran	7	Cucurbita pepo	NA	NA	Landrace	Asia	1e-05	1e-05	0.010862	0.015662	0.790975	1e-05	1e-05	1e-05	0.001633	0.180818	3	298
PI_222721	No	Iran	Tokhim-i-Kadoo	Cucurbita pepo	Market, Khoy, Azerbaijan. (Kadoo, Kadu, Kaddu = pumpkin/squash.)	NA	Landrace	Asia	0.041195	1e-05	1e-05	1e-05	0.649964	0.031304	1e-05	1e-05	0.001453	0.276034	3	307
PI_212001	No	Iran	2	Cucurbita pepo	NA	NA	Landrace	Asia	0.027094	0.02674	0.010472	0.015401	0.486447	0.033599	1e-05	1e-05	0.010261	0.389966	3	367
PI_155301	No	Yemen	NA	Cucurbita pepo	NA	NA	Landrace	Arab States	0.041576	1e-05	1e-05	1e-05	0.887603	1e-05	1e-05	0.004604	1e-05	0.066156	3	232
PI_234617	No	South Africa	Skorsie	Cucurbita pepo	Skorsie = squash	NA	Uncertain improvement status	Africa	1e-05	1e-05	0.882667	0.023377	0.014949	0.027082	1e-05	1e-05	0.047606	0.00428	2	466
PI_158990	No	South Africa	NA	Cucurbita pepo	Pumpkin	NA	Landrace	Africa	0.036494	0.087715	0.073078	0.087485	0.183203	0.214286	1e-05	0.243673	0.063402	0.010655	1	678
PI_299574	No	South Africa	Marrow	Cucurbita pepo	Fruits shape and size variable, with distinctive knobs, mottled green when immature, deep orange when ripe, pumpkin shaped, about 7in in diameter. South Africa's most popular variety.	NA	Uncertain improvement status	Africa	0.061825	0.130118	0.028368	0.087116	0.027683	0.194091	1e-05	0.236027	0.084391	0.15037	1	673
PI_216032	No	India	13764	Cucurbita pepo	Summer squash type. Market, Delhi.	NA	Landrace	Asia	0.01944	0.042575	0.701121	0.038277	0.013822	0.08914	1e-05	0.015499	0.012612	0.067506	2	405
PI_165992	No	India	Kadu	Cucurbita pepo	Kadu = pumpkin/squash.	NA	Landrace	Asia	0.025508	0.040424	0.028743	1e-05	0.335707	0.079081	0.38541	0.088106	0.004627	0.012383	3	344
PI_615151	No	India	Chappankaddu	Cucurbita pepo	(Kadoo, Kadu, Kaddu = pumpkin/squash.)	NA	Landrace	Asia	1e-05	1e-05	0.721705	0.083098	1e-05	0.122692	0.020611	0.023931	0.027923	1e-05	2	401
PI_431582	No	India	Pusa Alankar	Cucurbita pepo	NA	NA	Cultivated material	Asia	0.190111	0.05709	0.091301	0.027797	1e-05	0.152022	0.245233	0.081917	0.115865	0.038653	1	726
PI_274787	No	India	Yellow Round	Cucurbita pepo	NA	NA	Landrace	Asia	0.039322	0.037648	0.69361	0.04952	0.013363	0.127567	0.023345	1e-05	1e-05	0.015605	2	404
PI_163232	No	India	Gangeri	Cucurbita pepo	Cushaw. Received as Cucurbita moschata, reidentified per QS 37 12/69.	NA	Landrace	Asia	1e-05	1e-05	1e-05	0.047815	0.04287	1e-05	0.728578	0.072182	1e-05	0.108505	8	59
PI_615149	No	India	Chappankaddu	Cucurbita pepo	(Kadoo, Kadu, Kaddu = pumpkin/squash.)	NA	Landrace	Asia	0.016818	1e-05	0.667106	0.120349	0.005431	0.099805	0.00908	0.033981	0.043786	0.003635	2	400
PI_615150	No	India	Chappankaddu	Cucurbita pepo	(Kadoo, Kadu, Kaddu = pumpkin/squash.)	NA	Landrace	Asia	1e-05	0.072777	0.667152	0.002747	0.033204	0.141116	0.023697	0.052017	0.007269	1e-05	2	399
PI_615140	No	India	14-6-7	Cucurbita pepo	Highly resistant to Red Pumpkin Beetle (Aulacophora foveicollis).	NA	Uncertain improvement status	Asia	0.025159	1e-05	0.72069	0.086087	0.008171	0.128317	1e-05	1e-05	0.031536	1e-05	2	402
PI_175130	No	India	Kadu	Cucurbita pepo	Kadu = pumpkin/squash.	NA	Landrace	Asia	1e-05	1e-05	1e-05	1e-05	1e-05	1e-05	0.99991	1e-05	1e-05	1e-05	8	49
PI_212060	No	Greece	NA	Cucurbita pepo	NA	NA	Uncertain improvement status	Europe	1e-05	1e-05	0.018877	1e-05	0.138588	1e-05	1e-05	1e-05	0.842465	1e-05	5	178
PI_169418	No	Greece	Kabak Girit	Cucurbita pepo	Kabak = pumpkin/squash. Seed Store, Manisa. Originally from Crete.	NA	Landrace	Europe	0.09566	0.03382	0.025466	0.021604	0.353768	0.004247	0.045998	0.093282	0.224918	0.101237	3	385
PI_491202	No	Greece	WP 120	Cucurbita pepo	Zucchini type.	NA	Cultivated material	Europe	1e-05	1e-05	1e-05	1e-05	0.026329	1e-05	1e-05	1e-05	0.973591	1e-05	5	181
PI_212214	No	Greece	NA	Cucurbita pepo	NA	NA	Uncertain improvement status	Europe	1e-05	1e-05	1e-05	1e-05	0.11469	1e-05	1e-05	1e-05	0.88523	1e-05	5	177
PI_491201	No	Greece	Combocolokitho	Cucurbita pepo	Semi-bush, zucchini type. Skin light. Yield high.	NA	Cultivated material	Europe	1e-05	1e-05	1e-05	1e-05	1e-05	1e-05	1e-05	1e-05	0.99991	1e-05	5	183
PI_179273	No	Iraq	9885	Cucurbita pepo	"SD BORNE SMV" was in Accession Name field. Market, Baghdad, Iraq.	NA	Landrace	Arab States	0.05642	0.044735	1e-05	0.036229	1e-05	1e-05	0.013682	1e-05	0.056857	0.792037	1	588
PI_181763	No	Lebanon	Courge	Cucurbita pepo	Fruit white.	NA	Landrace	Arab States	0.064372	0.015624	0.111149	0.011841	0.545788	0.021841	0.018302	0.035853	0.045495	0.129736	3	289
PI_181758	No	Lebanon	9917	Cucurbita pepo	NA	NA	Landrace	Arab States	0.069181	0.026029	0.093205	1e-05	0.420703	1e-05	0.039393	0.163908	0.056175	0.131386	3	278
PI_181764	No	Lebanon	Courge	Cucurbita pepo	NA	NA	Landrace	Arab States	0.068217	1e-05	0.12426	1e-05	0.508444	0.032957	0.000871	0.013343	1e-05	0.251878	3	371
PI_181760	No	Lebanon	9947	Cucurbita pepo	NA	NA	Landrace	Arab States	0.260241	1e-05	0.066219	0.036904	0.295352	1e-05	0.036943	0.233232	0.071078	1e-05	1	713
PI_293433	No	Lebanon	NA	Cucurbita pepo	NA	NA	Uncertain improvement status	Arab States	0.351965	1e-05	0.039225	1e-05	0.2297	1e-05	1e-05	0.252196	1e-05	0.126864	1	711
PI_181761	No	Lebanon	9954	Cucurbita pepo	NA	NA	Landrace	Arab States	0.09988	1e-05	0.056777	1e-05	0.2404	1e-05	0.034539	0.221964	0.003817	0.342592	1	649
PI_181759	No	Lebanon	Ikriki	Cucurbita pepo	NA	NA	Landrace	Arab States	0.155775	1e-05	0.367204	1e-05	0.018678	1e-05	0.029841	1e-05	1e-05	0.428452	1	640
PI_525182	No	Egypt	Eskanderani (from Niagara)	Cucurbita pepo	NA	NA	Landrace	Africa	1e-05	1e-05	1e-05	1e-05	1e-05	1e-05	1e-05	1e-05	0.99991	1e-05	5	185
PI_525179	No	Egypt	Alexandria	Cucurbita pepo	NA	NA	Landrace	Africa	1e-05	1e-05	1e-05	1e-05	1e-05	1e-05	1e-05	1e-05	0.99991	1e-05	5	184
PI_525169	No	Egypt	54	Cucurbita pepo	Local type	NA	Landrace	Africa	1e-05	1e-05	1e-05	1e-05	1e-05	1e-05	1e-05	1e-05	0.99991	1e-05	5	186
PI_288241	No	Egypt	Eskandarany (Dokki form)	Cucurbita pepo	Dokki form. Male sterile strain. May yield 50 percent male sterile plants or all may be heterozygous for male sterility and plants grown from them must be selfed before male sterility appears. Plants vigorous; stems branched; leaves not deeply cleft, somewhat blotched; fruit similar to zucchini but rind light green as desired in Egypt. Seeds provided to Dr. H.M. Munger by Mr. Hamdy M Eisa. Male s…	NA	Landrace	Africa	1e-05	1e-05	1e-05	1e-05	1e-05	1e-05	1e-05	1e-05	0.99991	1e-05	5	182
PI_183232	No	Egypt	NA	Cucurbita pepo	Received as Cucurbita maxima.	NA	Uncertain improvement status	Africa	1e-05	1e-05	0.014897	1e-05	1e-05	1e-05	1e-05	1e-05	0.985023	1e-05	5	194
PI_525166	No	Egypt	9	Cucurbita pepo	Sown February, harvested April. Powdery mildew and viruses observed	NA	Landrace	Africa	1e-05	1e-05	0.002399	1e-05	1e-05	1e-05	1e-05	1e-05	0.997521	1e-05	5	192
PI_525173	No	Egypt	116	Cucurbita pepo	Local type	NA	Landrace	Africa	1e-05	1e-05	1e-05	1e-05	1e-05	1e-05	1e-05	1e-05	0.99991	1e-05	5	191
PI_525178	No	Egypt	173	Cucurbita pepo	Local type.	NA	Landrace	Africa	1e-05	1e-05	0.00833	1e-05	0.02466	1e-05	0.013486	0.033232	0.913161	0.007091	5	179
PI_525171	No	Egypt	107	Cucurbita pepo	Local type	NA	Landrace	Africa	1e-05	1e-05	1e-05	1e-05	1e-05	1e-05	1e-05	1e-05	0.99991	1e-05	5	189
PI_525170	No	Egypt	65	Cucurbita pepo	Local type. Sown February, harvested April. Powdery mildew, red spider, virus, and aphids observed.	NA	Landrace	Africa	1e-05	1e-05	0.007605	1e-05	1e-05	1e-05	1e-05	1e-05	0.992315	1e-05	5	195
PI_525176	No	Egypt	157	Cucurbita pepo	Local type. Sown November, harvested January	NA	Landrace	Africa	1e-05	1e-05	1e-05	1e-05	1e-05	1e-05	1e-05	1e-05	0.99991	1e-05	5	188
PI_525172	No	Egypt	111	Cucurbita pepo	NA	NA	Landrace	Africa	1e-05	1e-05	1e-05	1e-05	1e-05	1e-05	1e-05	1e-05	0.99991	1e-05	5	190
PI_525175	No	Egypt	141	Cucurbita pepo	Local type.	NA	Landrace	Africa	1e-05	1e-05	1e-05	1e-05	1e-05	1e-05	1e-05	1e-05	0.99991	1e-05	5	187
PI_288240	No	Egypt	Eskandarany	Cucurbita pepo	Bush type; runner length variable; fruits simlar to 'Cocozelle'; color variable.	NA	Landrace	Africa	1e-05	1e-05	0.035868	1e-05	1e-05	1e-05	1e-05	1e-05	0.964052	1e-05	5	180
PI_525177	No	Egypt	165	Cucurbita pepo	Sown March, harvested April. Not grown in Delta in Nov., Dec., Jan.	NA	Landrace	Africa	1e-05	1e-05	0.00326	1e-05	1e-05	1e-05	1e-05	1e-05	0.99666	1e-05	5	193
PI_193502	No	Ethiopia	Zierkurbis	Cucurbita pepo	NA	NA	Uncertain improvement status	Africa	0.08616	0.074732	0.044994	0.121933	1e-05	0.281557	1e-05	0.185859	0.105179	0.099565	1	672
PI_193501	No	Ethiopia	8493	Cucurbita pepo	NA	NA	Uncertain improvement status	Africa	1e-05	0.049691	0.008268	0.055469	0.107961	0.051679	0.20736	0.114551	0.036548	0.368462	1	671
PI_193499	No	Ethiopia	8698	Cucurbita pepo	Market, Diredawa. Cucurbita maxima component of original seed lot was split and assigned PI 599586.	NA	Landrace	Africa	1e-05	0.024537	0.002934	0.033599	0.135482	1e-05	0.2864	0.14089	0.035693	0.340444	1	670
PI_209783	No	Germany	Giessener Olkurbis	Cucurbita pepo	Naked seed.	NA	Cultivated material	Europe	0.090372	0.027126	1e-05	1e-05	1e-05	0.215159	1e-05	0.453734	0.213559	1e-05	4	529
PI_266925	No	Germany	Giessener Buscholkurbis	Cucurbita pepo	Bush type; naked seed.	NA	Cultivated material	Europe	0.090566	0.059206	1e-05	0.032163	1e-05	0.258037	0.034212	0.31023	0.183237	0.032329	1	682
PI_518689	No	Bolivia	Joko Japones	Cucurbita pepo	Fruit bright pumpkin-orange	NA	Cultivated material	South/Latin America	1e-05	1e-05	1e-05	1e-05	1e-05	0.99991	1e-05	1e-05	1e-05	1e-05	10	6
PI_214122	No	Bolivia	Escariote	Cucurbita pepo	NA	NA	Uncertain improvement status	South/Latin America	1e-05	0.128575	0.003146	0.500831	1e-05	1e-05	0.033102	0.049472	0.178077	0.106766	9	35
PI_269483	No	Pakistan	Petah	Cucurbita pepo	Hangu bazaar. Received as Cucurbita maxima, reid to C. pepo QS37 12/1969.	NA	Landrace	Asia	0.016494	0.009071	0.70206	0.073978	0.024471	0.0944	0.009849	1e-05	0.003108	0.066559	2	406
PI_219694	No	Pakistan	14147	Cucurbita pepo	Fruit from original grow-out does not match donor description. Donor description: fruit white; used for confectionary. Fruit oblong, green with raised ribs.	NA	Uncertain improvement status	Asia	1e-05	1e-05	1e-05	1e-05	1e-05	1e-05	0.99991	1e-05	1e-05	1e-05	8	55
PI_304061	No	Pakistan	Kadu	Cucurbita pepo	Kadu, Kaddu, Kadoo = pumpkin/squash. Component of PI 269484 (Cucurbita maxima). Bush vigor fair. Fruit oblong 3 by 18 cm, ridged, netted, yellowish grey, weight 3.9 kg.; flesh orange, seeds small, pointed oval, white with brown rim. Early maturity. Susceptible to mosiac and powdery mildew.	NA	Landrace	Asia	1e-05	1e-05	1e-05	1e-05	1e-05	1e-05	0.99991	1e-05	1e-05	1e-05	8	56
PI_608048	No	Pakistan	Col. No. 509	Cucurbita pepo	Separation from C. maxima PI 269484; Col. No. 509, "kadu" (pumpkin); from Mangora village bazaar, Swat.	NA	Landrace	Asia	1e-05	1e-05	1e-05	1e-05	1e-05	1e-05	0.99991	1e-05	1e-05	1e-05	8	50
PI_260653	No	Ukraine	Dnepropetrovsk	Cucurbita pepo	A bush type.	NA	Uncertain improvement status	Europe	0.025198	1e-05	0.003212	0.015588	0.084386	0.147917	0.086485	0.172603	0.151922	0.312679	1	664
PI_506443	No	Ukraine	NA	Cucurbita pepo	Squash. Local type.	NA	Cultivated material	Europe	1e-05	1e-05	0.000457	0.024916	0.798177	0.031817	0.02269	0.004897	0.117016	1e-05	3	265
PI_267755	No	United Kingdom	Vegetable Marrow	Cucurbita pepo	Table variety. Plants runners, vigorous, early maturing; fruit dark green, striped orange, smooth, oblong, 11 by 5 inches, four per plant. Susceptible to mosaic and powdery mildew.	NA	Uncertain improvement status	Europe	0.035637	0.07979	0.125615	0.153026	1e-05	0.286752	0.011436	0.258654	0.04907	1e-05	1	679
PI_451851	No	Guatemala	Guicoy	Cucurbita pepo	Fruit zucchini-shaped.	NA	Landrace	South/Latin America	0.199364	0.300141	1e-05	1e-05	1e-05	0.183662	0.004934	0.154146	0.157713	1e-05	1	728
PI_451853	No	Guatemala	Guicoy	Cucurbita pepo	Fruit with large, white dot on bottom.	NA	Landrace	South/Latin America	1e-05	0.853567	1e-05	1e-05	1e-05	0.146353	1e-05	1e-05	1e-05	1e-05	6	105
PI_451852	No	Guatemala	Guicoy	Cucurbita pepo	Fruit flying saucer shaped.	NA	Landrace	South/Latin America	0.045959	0.012299	0.744251	1e-05	0.015378	0.034812	0.011227	0.081122	0.054933	1e-05	2	398
PI_438575	No	Guatemala	Guicoy	Cucurbita pepo	Fruit flat, ribbed, orange color, 25cm wide, 15cm long. Flesh orange, lemon odor. Received as C. maxima.	NA	Landrace	South/Latin America	1e-05	0.908502	1e-05	1e-05	1e-05	0.091418	1e-05	1e-05	1e-05	1e-05	6	103
PI_458748	No	Guatemala	Guicoy Amarillo Chiguito	Cucurbita pepo	Fruit 0.7kg, yellow, small-ribbed, shaped like acorn squash.	NA	Landrace	South/Latin America	1e-05	0.885117	1e-05	1e-05	1e-05	0.114803	1e-05	1e-05	1e-05	1e-05	6	110
PI_458750	No	Guatemala	Guicoy Grande Verde	Cucurbita pepo	Fruit 2.0kg, greenish-yellow, large, acorn-shaped.	NA	Landrace	South/Latin America	1e-05	0.879557	1e-05	1e-05	1e-05	0.120363	1e-05	1e-05	1e-05	1e-05	6	109
PI_311103	No	Guatemala	Culabasa	Cucurbita pepo	Market in Huehuetenango.	NA	Landrace	South/Latin America	1e-05	0.869596	1e-05	1e-05	1e-05	0.130324	1e-05	1e-05	1e-05	1e-05	6	108
PI_451849	No	Guatemala	Guicoy	Cucurbita pepo	Fruit with small, white dot on bottom.	NA	Landrace	South/Latin America	1e-05	0.85433	1e-05	1e-05	1e-05	0.14559	1e-05	1e-05	1e-05	1e-05	6	107
PI_451854	No	Guatemala	Guicoy	Cucurbita pepo	NA	NA	Landrace	South/Latin America	1e-05	0.885717	1e-05	1e-05	1e-05	0.114203	1e-05	1e-05	1e-05	1e-05	6	111
PI_449350	No	Guatemala	Ixchil	Cucurbita pepo	NA	NA	Landrace	South/Latin America	1e-05	0.807911	1e-05	1e-05	1e-05	0.192009	1e-05	1e-05	1e-05	1e-05	6	162
PI_311102	No	Guatemala	Culabasa	Cucurbita pepo	Market in Huehuetenango.	NA	Landrace	South/Latin America	1e-05	0.85467	1e-05	1e-05	1e-05	0.14525	1e-05	1e-05	1e-05	1e-05	6	106
PI_274336	No	Guatemala	NA	Cucurbita pepo	NA	NA	Uncertain improvement status	South/Latin America	1e-05	0.672942	1e-05	1e-05	0.192139	0.134849	1e-05	1e-05	1e-05	1e-05	6	159
PI_293791	No	Uzbekistan	1341	Cucurbita pepo	Tashkent bazaar, Uzbeck Republic. Fruit small, round, harvested August.	NA	Landrace	Asia	1e-05	1e-05	0.026588	0.045702	0.020886	0.11012	0.02038	0.405331	0.090272	0.280702	4	566
PI_306126	No	Bulgaria	Jantra	Cucurbita pepo	NA	NA	Uncertain improvement status	Europe	1e-05	1e-05	1e-05	1e-05	0.984132	1e-05	0.009286	1e-05	0.006512	1e-05	3	201
PI_314806	No	Netherlands	566	Cucurbita pepo	Received as Cucurbita sp.; identified as C. mixta per QS37; and re-id to C.pepo 04/05/1999. Bush type.	NA	Uncertain improvement status	Europe	0.095289	0.008663	0.352962	0.028888	1e-05	0.142792	1e-05	0.308117	0.063257	1e-05	2	480
PI_368593	No	Macedonia	Izdolzena	Cucurbita pepo	NA	NA	Landrace	Europe	0.025233	0.012871	0.000621	1e-05	1e-05	0.003945	1e-05	0.826914	1e-05	0.130376	4	507
PI_368590	No	Macedonia	Elipsovidna	Cucurbita pepo	NA	NA	Landrace	Europe	0.034193	0.000946	0.025872	0.03608	0.170553	0.060265	0.003165	0.464536	0.106726	0.097664	4	552
PI_368592	No	Macedonia	Volovska	Cucurbita pepo	NA	NA	Landrace	Europe	0.013746	1e-05	0.023766	0.053719	0.03871	0.037411	0.016006	0.745589	0.033009	0.038034	4	511
PI_368594	No	Macedonia	Zolta	Cucurbita pepo	NA	NA	Landrace	Europe	1e-05	1e-05	0.038553	1e-05	0.09004	0.07075	0.035814	0.549811	0.010499	0.204502	4	548
PI_368587	No	Macedonia	Stocna	Cucurbita pepo	NA	NA	Landrace	Europe	1e-05	1e-05	0.002166	0.024256	0.042483	0.11115	1e-05	0.482164	0.054968	0.282783	4	565
PI_357960	No	Macedonia	Resenska	Cucurbita pepo	NA	NA	Landrace	Europe	0.045713	0.008124	0.003239	1e-05	0.598632	1e-05	1e-05	0.344242	1e-05	1e-05	3	272
PI_368608	No	Macedonia	Lokalna	Cucurbita pepo	NA	NA	Landrace	Europe	1e-05	1e-05	1e-05	1e-05	1e-05	1e-05	1e-05	0.99991	1e-05	1e-05	4	487
PI_379309	No	Macedonia	Volovska	Cucurbita pepo	NA	NA	Landrace	Europe	1e-05	0.010023	0.009771	0.015822	1e-05	0.05162	0.035898	0.728976	0.030302	0.117568	4	521
PI_368586	No	Macedonia	Zolta	Cucurbita pepo	NA	NA	Landrace	Europe	1e-05	1e-05	0.015143	1e-05	1e-05	1e-05	0.015408	0.927323	0.042066	1e-05	4	499
PI_368600	No	Macedonia	Obicna	Cucurbita pepo	NA	NA	Landrace	Europe	1e-05	1e-05	0.037506	1e-05	0.054646	0.036145	0.031832	0.44829	0.103631	0.287919	4	564
PI_368601	No	Macedonia	Stocna	Cucurbita pepo	NA	NA	Landrace	Europe	0.016789	0.005608	0.003072	0.019122	0.038822	0.111394	0.03878	0.536705	0.059506	0.170204	4	559
PI_368589	No	Macedonia	Okrugla	Cucurbita pepo	NA	NA	Landrace	Europe	1e-05	0.008561	0.063186	0.014691	0.07442	0.052359	1e-05	0.662088	0.029021	0.095654	4	538
PI_368591	No	Macedonia	Tikvica	Cucurbita pepo	NA	NA	Landrace	Europe	1e-05	1e-05	0.027625	1e-05	1e-05	0.066289	0.075736	0.511604	0.070679	0.248026	4	545
PI_368607	No	Macedonia	Furazna	Cucurbita pepo	Vegetable Marrow.	NA	Landrace	Europe	1e-05	0.024397	0.044796	1e-05	0.080774	0.060961	0.003324	0.669734	1e-05	0.115984	4	539
PI_370465	No	Macedonia	Stocna	Cucurbita pepo	NA	NA	Landrace	Europe	0.026975	1e-05	0.019072	0.005955	0.074508	0.055677	0.005682	0.516623	1e-05	0.295487	4	550
PI_370466	No	Macedonia	Govedska	Cucurbita pepo	NA	NA	Landrace	Europe	0.036368	0.059303	1e-05	1e-05	0.056038	0.065164	0.033883	0.561359	0.079228	0.108637	4	555
PI_368595	No	Macedonia	Trkalezna	Cucurbita pepo	NA	NA	Landrace	Europe	1e-05	1e-05	0.045175	1e-05	1e-05	0.097773	0.031872	0.527355	0.055902	0.241883	4	546
PI_379302	No	Macedonia	Prstesta	Cucurbita pepo	NA	NA	Wild material	Europe	1e-05	1e-05	0.99991	1e-05	1e-05	1e-05	1e-05	1e-05	1e-05	1e-05	2	423
PI_368599	No	Macedonia	Tikvica	Cucurbita pepo	NA	NA	Landrace	Europe	0.026622	0.019604	0.015498	1e-05	0.435418	0.00585	0.035934	0.383126	0.077928	1e-05	4	577
PI_368598	No	Macedonia	Zolto zelena	Cucurbita pepo	NA	NA	Landrace	Europe	0.023064	1e-05	0.02174	0.036715	0.056566	0.083565	0.030032	0.503327	0.081249	0.163733	4	558
PI_379324	No	Macedonia	Volovska	Cucurbita pepo	NA	NA	Landrace	Europe	1e-05	1e-05	0.024933	0.024425	0.067724	0.036306	0.067463	0.576401	0.062071	0.140657	4	557
PI_379310	No	Macedonia	Zeljanka	Cucurbita pepo	NA	NA	Landrace	Europe	1e-05	1e-05	0.021469	1e-05	1e-05	1e-05	0.005038	0.814833	0.087491	0.07112	4	505
PI_379311	No	Macedonia	Golosemenka	Cucurbita pepo	Hull-less seed present.	NA	Landrace	Europe	1e-05	1e-05	1e-05	1e-05	0.046314	1e-05	0.04772	0.863934	1e-05	0.041973	4	490
PI_368602	No	Macedonia	Pcenkarna stara	Cucurbita pepo	NA	NA	Landrace	Europe	0.034534	0.029339	0.013975	0.023397	1e-05	1e-05	1e-05	0.850582	0.048133	1e-05	4	488
PI_379313	No	Macedonia	Zelnikarka	Cucurbita pepo	NA	NA	Landrace	Europe	1e-05	1e-05	0.024847	1e-05	0.094376	0.035754	1e-05	0.634864	0.025906	0.184213	4	543
PI_357935	No	Macedonia	Zoltokorka	Cucurbita pepo	NA	NA	Landrace	Europe	0.034465	0.024824	0.026873	1e-05	0.035448	1e-05	0.007692	0.870657	1e-05	1e-05	4	492
PI_379315	No	Macedonia	Tikvica	Cucurbita pepo	NA	NA	Landrace	Europe	1e-05	1e-05	1e-05	1e-05	0.825419	1e-05	1e-05	0.174501	1e-05	1e-05	3	268
PI_379316	No	Macedonia	Tikvica	Cucurbita pepo	NA	NA	Landrace	Europe	0.001732	1e-05	1e-05	1e-05	0.812597	1e-05	0.000864	0.184748	1e-05	1e-05	3	267
PI_379317	No	Macedonia	Tikvica	Cucurbita pepo	Tikvica = squash, gourd.	NA	Landrace	Europe	1e-05	1e-05	1e-05	1e-05	0.889796	1e-05	1e-05	0.104503	0.005632	1e-05	3	225
PI_379318	No	Macedonia	Svinska	Cucurbita pepo	NA	NA	Landrace	Europe	0.02816	1e-05	0.0229	1e-05	0.023379	0.041787	0.100094	0.478129	0.135187	0.170344	4	554
PI_379319	No	Macedonia	Golosemenka	Cucurbita pepo	NA	NA	Landrace	Europe	1e-05	0.033294	1e-05	1e-05	0.045488	0.095058	0.047588	0.525724	0.084254	0.168564	4	560
PI_379321	No	Macedonia	Biskarak	Cucurbita pepo	NA	NA	Landrace	Europe	0.053799	1e-05	0.042584	0.005056	0.0528	0.034802	0.081904	0.513868	1e-05	0.215167	4	551
PI_379308	No	Macedonia	Furazna	Cucurbita pepo	NA	NA	Landrace	Europe	0.034452	1e-05	0.040992	0.037499	0.09563	0.016892	0.041102	0.733403	1e-05	1e-05	4	516
PI_357929	No	Macedonia	Zelena	Cucurbita pepo	NA	NA	Landrace	Europe	1e-05	1e-05	0.019033	0.069687	0.009799	0.012073	0.046581	0.657013	1e-05	0.185784	4	535
PI_357944	No	Macedonia	Sopska	Cucurbita pepo	NA	NA	Landrace	Europe	0.041479	1e-05	0.038895	0.024935	0.039201	0.021404	0.012713	0.638368	0.052647	0.130349	4	536
PI_357947	No	Macedonia	Zelnikarka	Cucurbita pepo	NA	NA	Landrace	Europe	1e-05	1e-05	0.037718	1e-05	1e-05	0.02429	0.045127	0.597724	0.058145	0.236955	4	544
PI_379312	No	Macedonia	Volovska	Cucurbita pepo	NA	NA	Landrace	Europe	1e-05	1e-05	0.005391	1e-05	0.105209	0.046253	1e-05	0.61005	0.051166	0.181892	4	541
PI_357949	No	Macedonia	Bolta	Cucurbita pepo	NA	NA	Landrace	Europe	1e-05	1e-05	0.019422	0.103317	0.434967	0.021782	0.005642	0.350164	0.032495	0.032189	4	575
PI_368604	No	Macedonia	Stocna	Cucurbita pepo	NA	NA	Landrace	Europe	1e-05	1e-05	0.01497	1e-05	0.314415	1e-05	0.009381	0.653426	1e-05	0.007758	4	568
PI_368605	No	Macedonia	Tikvica bela	Cucurbita pepo	Vegetable Marrow.	NA	Landrace	Europe	0.022733	1e-05	0.038285	1e-05	0.201283	0.027528	0.042939	0.643157	0.024045	1e-05	4	570
PI_368606	No	Macedonia	Zeljanka	Cucurbita pepo	NA	NA	Landrace	Europe	0.034854	1.1e-05	0.020853	1e-05	0.060391	0.036573	0.061771	0.565772	0.046934	0.172831	4	556
PI_357954	No	Macedonia	Crna	Cucurbita pepo	NA	NA	Landrace	Europe	1e-05	0.00629	0.046159	1e-05	0.020651	0.020011	0.02007	0.884762	0.002027	1e-05	4	491
PI_357955	No	Macedonia	Bela sakaska	Cucurbita pepo	NA	NA	Landrace	Europe	0.132521	0.047768	1e-05	1e-05	0.298749	0.076766	1e-05	0.357782	0.07278	0.013604	4	573
PI_368609	No	Macedonia	Tikva svinjska	Cucurbita pepo	NA	NA	Landrace	Europe	1e-05	1e-05	0.030491	1e-05	0.013411	1e-05	0.013594	0.904188	0.038266	1e-05	4	498
PI_368610	No	Macedonia	Pcenkarka	Cucurbita pepo	NA	NA	Landrace	Europe	0.04332	1e-05	0.020961	1e-05	0.03807	0.010569	0.016047	0.864805	0.006199	1e-05	4	493
PI_379322	No	Macedonia	Gotvarska	Cucurbita pepo	NA	NA	Landrace	Europe	0.060381	0.008029	0.070111	0.008173	0.224706	0.031044	0.007169	0.354626	0.137286	0.098475	4	574
PI_379323	No	Macedonia	Stocna	Cucurbita pepo	NA	NA	Landrace	Europe	0.033112	1e-05	0.061123	1e-05	0.100246	1e-05	0.024023	0.646023	1e-05	0.135434	4	537
PI_368614	No	Macedonia	Golo semka	Cucurbita pepo	NA	NA	Landrace	Europe	1e-05	0.018867	1e-05	0.00568	0.043246	0.094063	0.063214	0.774832	6.8e-05	1e-05	4	517
PI_368615	No	Macedonia	Obicna tikva	Cucurbita pepo	NA	NA	Landrace	Europe	1e-05	1e-05	0.006633	1e-05	1e-05	1e-05	0.027394	0.894797	0.010458	0.060668	4	497
PI_357948	No	Macedonia	Bucinka	Cucurbita pepo	NA	NA	Landrace	Europe	0.012887	1e-05	0.0141	1e-05	0.086117	0.053776	0.004818	0.652065	0.020595	0.155623	4	542
PI_357892	No	Macedonia	Cajcarinja	Cucurbita pepo	NA	NA	Landrace	Europe	0.052419	1e-05	0.065301	1e-05	1e-05	0.261461	0.053546	0.413124	0.074715	0.079404	4	531
PI_357893	No	Macedonia	Cincarka	Cucurbita pepo	NA	NA	Landrace	Europe	0.038835	1e-05	0.472023	1e-05	1e-05	0.076357	0.035113	0.345758	0.019015	0.012868	2	479
PI_357921	No	Macedonia	Bela gotvarska	Cucurbita pepo	NA	NA	Landrace	Europe	1e-05	1e-05	0.000338	1e-05	0.760609	1e-05	1e-05	0.238983	1e-05	1e-05	3	270
PI_357922	No	Macedonia	Bela negotinska	Cucurbita pepo	NA	NA	Landrace	Europe	1e-05	1e-05	1e-05	1e-05	0.859902	1e-05	0.015397	0.124631	1e-05	1e-05	3	226
PI_357923	No	Macedonia	Strumicka	Cucurbita pepo	NA	NA	Landrace	Europe	0.060449	0.010408	0.464602	0.000186	0.056536	0.05815	0.05268	0.214688	1e-05	0.082289	2	485
PI_357924	No	Macedonia	Radoviska sakaska	Cucurbita pepo	NA	NA	Landrace	Europe	0.042298	1e-05	0.019206	0.019441	0.592122	1e-05	0.017521	0.272127	0.011194	0.02607	3	275
PI_357925	No	Macedonia	Stipska sakaska	Cucurbita pepo	NA	NA	Landrace	Europe	1e-05	0.004749	1e-05	0.021709	0.918204	1e-05	1e-05	0.04802	0.007268	1e-05	3	218
PI_357926	No	Macedonia	Mekokorka	Cucurbita pepo	NA	NA	Landrace	Europe	0.034231	1e-05	0.007921	0.03713	0.130299	0.066364	0.050116	0.386476	0.077946	0.209507	4	561
PI_357927	No	Macedonia	Zelenokorka	Cucurbita pepo	NA	NA	Landrace	Europe	0.029108	1e-05	0.039465	0.061938	0.075699	0.083544	0.041164	0.425899	1e-05	0.243163	4	562
PI_357928	No	Macedonia	Vojnicka	Cucurbita pepo	NA	NA	Landrace	Europe	1e-05	1e-05	0.036605	0.059418	1e-05	0.021965	0.019571	0.642979	0.044851	0.174581	4	534
PI_357943	No	Macedonia	Slatkarka	Cucurbita pepo	NA	NA	Landrace	Europe	0.038314	1e-05	0.028192	1e-05	0.48891	1e-05	0.030057	0.409328	1e-05	0.005158	4	578
PI_357930	No	Macedonia	Prilepska	Cucurbita pepo	NA	NA	Landrace	Europe	0.018247	1e-05	1e-05	1e-05	0.007821	1e-05	0.047285	0.909501	0.017096	1e-05	4	501
PI_357931	No	Macedonia	Prilepska	Cucurbita pepo	Bi-color gourds, solid and striped; "spoon" type - pyriform.	NA	Landrace	Europe	0.017972	1e-05	0.836814	0.015306	1e-05	0.015713	0.000462	0.112103	0.000818	0.000791	2	458
PI_357932	No	Macedonia	Sakaska	Cucurbita pepo	NA	NA	Landrace	Europe	1e-05	1e-05	0.001282	1e-05	0.746039	1e-05	1e-05	0.25261	1e-05	1e-05	3	271
PI_357933	No	Macedonia	Stocna	Cucurbita pepo	NA	NA	Landrace	Europe	1e-05	1e-05	0.009436	1e-05	0.013627	1e-05	1e-05	0.932517	1e-05	0.04436	4	496
PI_357950	No	Macedonia	Bela	Cucurbita pepo	NA	NA	Landrace	Europe	0.010376	0.004709	0.006326	1e-05	0.619214	0.000365	0.042573	0.274859	0.041558	1e-05	3	276
PI_357936	No	Macedonia	Sarena	Cucurbita pepo	NA	NA	Landrace	Europe	0.017814	1e-05	1e-05	1e-05	1e-05	0.026903	0.031309	0.904335	0.019589	1e-05	4	502
PI_357937	No	Macedonia	Zolta	Cucurbita pepo	NA	NA	Landrace	Europe	0.009956	1e-05	0.016536	1e-05	1e-05	1e-05	0.00739	0.912653	0.053414	1e-05	4	500
PI_357938	No	Macedonia	Temnozelena	Cucurbita pepo	NA	NA	Landrace	Europe	0.042515	0.013168	1e-05	1e-05	0.017506	0.019884	1e-05	0.838247	1e-05	0.06864	4	506
PI_357939	No	Macedonia	Crna	Cucurbita pepo	NA	NA	Landrace	Europe	1e-05	1e-05	0.034278	0.008731	0.054978	1e-05	0.007171	0.870326	0.024476	1e-05	4	494
PI_357940	No	Macedonia	Ohirdska	Cucurbita pepo	NA	NA	Landrace	Europe	0.014235	0.009708	0.013811	1e-05	0.07575	1e-05	1e-05	0.768712	0.0538	0.063954	4	512
PI_357941	No	Macedonia	Talijanska	Cucurbita pepo	NA	NA	Landrace	Europe	1e-05	0.060255	0.019392	1e-05	0.574187	1e-05	0.016227	0.268928	0.052708	0.008273	3	274
PI_357942	No	Macedonia	Lazecka	Cucurbita pepo	NA	NA	Landrace	Europe	1e-05	1e-05	0.049256	0.017064	1e-05	1e-05	1e-05	0.807645	1e-05	0.125975	4	508
PI_357961	No	Macedonia	Zelenikovska	Cucurbita pepo	NA	NA	Landrace	Europe	1e-05	1e-05	1e-05	1e-05	0.887489	1e-05	1e-05	0.112431	1e-05	1e-05	3	224
PI_357962	No	Macedonia	Novo-selska	Cucurbita pepo	NA	NA	Landrace	Europe	0.005602	1e-05	1e-05	0.018807	0.83041	1e-05	1e-05	0.122786	0.022346	1e-05	3	227
PI_357963	No	Macedonia	Volovarska	Cucurbita pepo	NA	NA	Landrace	Europe	1e-05	1e-05	1e-05	0.008504	0.040021	0.04626	1e-05	0.77732	0.026364	0.101492	4	519
PI_357964	No	Macedonia	Volovska	Cucurbita pepo	NA	NA	Landrace	Europe	1e-05	0.013727	1e-05	1e-05	0.177093	0.019864	0.004088	0.720775	0.019482	0.04494	4	571
PI_357965	No	Macedonia	Bukovska	Cucurbita pepo	NA	NA	Landrace	Europe	1e-05	1e-05	0.045988	0.002416	0.162015	1e-05	1e-05	0.685603	1e-05	0.103929	4	572
PI_357966	No	Macedonia	Zolta Dolga	Cucurbita pepo	NA	NA	Landrace	Europe	0.01442	1e-05	0.032816	0.027638	0.311773	0.012701	1e-05	0.571726	1e-05	0.028897	4	567
PI_357952	No	Macedonia	Kontamisi	Cucurbita pepo	Vegetable Marrow.	NA	Landrace	Europe	0.062194	0.041469	1e-05	1e-05	0.376499	0.037	0.004017	0.453648	0.025143	1e-05	4	576
PI_357953	No	Macedonia	Kunkulpete	Cucurbita pepo	NA	NA	Landrace	Europe	0.064782	0.01176	0.023224	0.003657	0.100045	0.019459	1e-05	0.742015	0.031664	0.003385	4	515
PI_357969	No	Macedonia	Bitolska	Cucurbita pepo	NA	NA	Landrace	Europe	0.014766	1e-05	0.016525	1e-05	0.765906	1e-05	0.023223	0.12893	0.05061	1e-05	3	325
PI_357970	No	Macedonia	Lazecka	Cucurbita pepo	NA	NA	Landrace	Europe	0.018643	1e-05	0.009486	1e-05	0.087828	0.012856	0.016135	0.764581	0.040412	0.05004	4	513
PI_357956	No	Macedonia	Koselska	Cucurbita pepo	NA	NA	Landrace	Europe	1e-05	1e-05	1e-05	0.021944	0.01375	0.049559	0.015426	0.750577	0.056931	0.091783	4	520
PI_357957	No	Macedonia	Zelena	Cucurbita pepo	NA	NA	Landrace	Europe	1e-05	1.6e-05	0.012576	0.063133	1e-05	1e-05	0.015557	0.806206	0.053467	0.049017	4	503
PI_357973	No	Macedonia	Mokrinska	Cucurbita pepo	NA	NA	Landrace	Europe	0.000394	0.004928	0.530233	1e-05	0.070275	0.031605	0.006881	0.184159	0.036901	0.134614	2	486
PI_357974	No	Macedonia	Dekorativna	Cucurbita pepo	NA	NA	Landrace	Europe	1e-05	1e-05	0.887041	1e-05	0.021564	0.025805	0.00993	0.036843	0.009631	0.009156	2	468
PI_368597	No	Macedonia	Cilindricna	Cucurbita pepo	NA	NA	Landrace	Europe	1e-05	0.001845	0.021172	1e-05	0.035893	0.084247	0.003049	0.662063	1e-05	0.1917	4	540
PI_368612	No	Macedonia	Crna furazna	Cucurbita pepo	NA	NA	Landrace	Europe	0.002284	0.057906	0.057665	1e-05	0.064611	1e-05	0.06603	0.703056	0.048418	1e-05	4	514
PI_357968	No	Macedonia	Gotvarska	Cucurbita pepo	NA	NA	Landrace	Europe	0.009824	0.023233	0.00253	1e-05	0.755885	1e-05	0.015272	0.193216	1e-05	1e-05	3	269
PI_370463	No	Macedonia	Pcenkarka	Cucurbita pepo	NA	NA	Landrace	Europe	1.9e-05	1e-05	0.031564	0.041778	0.080056	0.061087	1e-05	0.576248	0.007394	0.201835	4	549
PI_368588	No	Macedonia	Zelena	Cucurbita pepo	NA	NA	Landrace	Europe	1e-05	1e-05	0.022919	0.042304	0.081569	0.056281	1e-05	0.55016	0.065434	0.181303	4	547
PI_357967	No	Macedonia	Bela svinska	Cucurbita pepo	NA	NA	Landrace	Europe	1e-05	1e-05	0.002249	1e-05	0.342622	0.023435	1e-05	0.627778	0.003866	1e-05	4	569
PI_357972	No	Macedonia	Przalka	Cucurbita pepo	NA	NA	Landrace	Europe	1e-05	1e-05	0.013324	1e-05	0.176207	0.037443	0.017112	0.483063	0.107244	0.165577	4	553
PI_370467	No	Macedonia	Badarska	Cucurbita pepo	NA	NA	Landrace	Europe	0.032279	1e-05	0.032123	1e-05	0.024159	0.018246	0.036149	0.731758	0.025834	0.099432	4	509
PI_370464	No	Macedonia	Klecovska	Cucurbita pepo	NA	NA	Landrace	Europe	1e-05	1e-05	1e-05	0.042512	0.026561	0.08385	0.035692	0.679354	0.036188	0.095814	4	518
PI_357971	No	Macedonia	Kukurecanska	Cucurbita pepo	NA	NA	Landrace	Europe	0.013835	0.02693	0.014678	1e-05	0.069335	1e-05	1e-05	0.875172	1e-05	1e-05	4	495
PI_368617	No	Macedonia	Ukrasna	Cucurbita pepo	NA	NA	Landrace	Europe	1e-05	1e-05	0.99991	1e-05	1e-05	1e-05	1e-05	1e-05	1e-05	1e-05	2	428
PI_370462	No	Macedonia	Volovksa	Cucurbita pepo	Vegetable Marrow.	NA	Landrace	Europe	0.044635	0.020263	0.03035	1e-05	0.029685	1e-05	0.041108	0.69917	0.043531	0.091237	4	510
PI_368596	No	Macedonia	Zelena	Cucurbita pepo	NA	NA	Landrace	Europe	0.040373	1e-05	0.038964	1.4e-05	1e-05	0.024432	0.007046	0.500964	0.093444	0.294742	4	563
PI_368611	No	Macedonia	Golo semka	Cucurbita pepo	NA	NA	Landrace	Europe	1e-05	1e-05	0.013089	1e-05	0.032911	1e-05	0.020417	0.834441	0.074566	0.024537	4	504
PI_368616	No	Macedonia	Tikva obicna	Cucurbita pepo	NA	NA	Landrace	Europe	0.021579	0.05803	0.055368	1e-05	1e-05	1e-05	1e-05	0.862795	0.002177	1e-05	4	489
PI_615155	No	Russia	Ames 24519	Cucurbita pepo	Good vigor; gives 2 or 3 fruits of 8 pounds each; seeds are green skinned, large; seed yield is not much above 1 cup per fruit.	NA	Cultivated material	Europe	0.112466	0.038498	1e-05	1e-05	0.01052	0.243415	1e-05	0.379036	0.130208	0.085827	4	524
PI_507886	No	Hungary	2701060	Cucurbita pepo	NA	NA	Landrace	Europe	0.128587	1e-05	1e-05	0.043777	0.049952	0.157008	0.03234	0.202176	0.272372	0.113769	1	687
PI_531318	No	Hungary	Szendehelyi	Cucurbita pepo	NA	NA	Landrace	Europe	0.056436	1e-05	0.036128	0.097921	0.000927	0.247873	0.05225	0.308567	0.115264	0.084624	1	681
PI_507882	No	Hungary	2701055	Cucurbita pepo	Received as Cucurbita maxima.	NA	Wild material	Europe	0.013788	1e-05	0.013102	0.06061	1e-05	0.212327	0.036906	0.451974	0.166938	0.044336	4	528
PI_507885	No	Hungary	2700777	Cucurbita pepo	NA	NA	Landrace	Europe	0.08743	1e-05	0.074194	0.105073	0.02879	0.327587	0.006	0.279416	0.033831	0.057669	1	680
PI_507888	No	Hungary	2701062	Cucurbita pepo	NA	NA	Landrace	Europe	0.035416	1e-05	1e-05	0.031354	1e-05	0.21198	0.024515	0.402505	0.181548	0.112652	4	526
PI_364241	No	Hungary	Hejatlan Magn	Cucurbita pepo	Naked seed.	NA	Uncertain improvement status	Europe	0.052439	0.064741	1e-05	1e-05	1e-05	0.192972	0.01845	0.467358	0.204001	1e-05	4	530
PI_507887	No	Hungary	2701061	Cucurbita pepo	NA	NA	Landrace	Europe	0.093931	0.028135	0.006228	0.049402	0.072369	0.203622	1e-05	0.273996	0.123408	0.148899	1	692
PI_482593	No	Zimbabwe	Nyakaruswanga	Cucurbita pepo	NA	NA	Cultivated material	Africa	0.068746	0.12048	0.008879	0.245301	0.039862	0.208129	0.04048	0.233831	1e-05	0.034282	1	675
PI_482592	No	Zimbabwe	Hokore	Cucurbita pepo	Sown November, harvested April. Fruits hard skinned and warty.	NA	Cultivated material	Africa	0.093366	0.151683	0.002778	0.198966	0.019159	0.216056	0.010483	0.10314	0.061827	0.142542	1	677
PI_482590	No	Zimbabwe	Madhasana	Cucurbita pepo	NA	NA	Cultivated material	Africa	0.03564	0.066501	0.018809	0.217237	0.031594	0.154642	0.018678	0.239607	0.081111	0.136181	1	674
PI_490277	No	Costa Rica	Zapallo	Cucurbita pepo	Maturity late. Plants viney. Fruit ribbed, striped, globe-shaped.	NA	Cultivated material	South/Latin America	1e-05	0.801126	1e-05	1e-05	1e-05	0.173813	0.024991	1e-05	1e-05	1e-05	6	161
PI_506441	No	Moldova	NA	Cucurbita pepo	Summer squash. Local type. Fruit broad, cylindrical, pale green. Received as Cucurbita moschata.	NA	Cultivated material	Europe	0.060709	0.062832	1e-05	1e-05	0.162418	0.104507	0.019087	0.225159	0.014305	0.350963	1	667
PI_615133	No	Austria	Gleisdorfer Olkurbis	Cucurbita pepo	Vine type, hull-less seeds.	NA	Cultivated material	Europe	0.046454	0.014975	1e-05	1.2e-05	0.00111	0.149903	1e-05	0.477569	0.142915	0.167042	4	532
PI_615141	No	Kazakhstan	Ames 19040	Cucurbita pepo	Fruit large.	NA	Uncertain improvement status	Asia	1e-05	1e-05	1e-05	0.01459	0.806197	0.065385	0.020197	0.075916	1e-05	0.017675	3	228
PI_615142	No	Kazakhstan	Ames 19041	Cucurbita pepo	Eating type.	NA	Uncertain improvement status	Asia	0.058368	0.014162	1e-05	0.056914	0.119137	0.183909	0.039172	0.21121	0.114632	0.202487	1	663
PI_615143	No	Kazakhstan	Ames 19042	Cucurbita pepo	Fruit pickled.	NA	Uncertain improvement status	Asia	1e-05	1e-05	0.849907	0.01464	0.016428	0.070047	1e-05	1.5e-05	0.048923	1e-05	2	469
PI_615154	No	Nepal	7000	Cucurbita pepo	NA	NA	Cultivated material	Asia	0.651374	1e-05	1e-05	0.008328	1e-05	0.110627	1e-05	1e-05	0.229611	1e-05	7	75
PI_511970	No	NA	Calabaza (Span.) Imai (Tepehuan)	Cucurbita pepo	Calabaza (Spanish), Imai (Tepehuan), baci (Tarahomara).	NA	Landrace	NA	0.00871	0.907749	1e-05	0.08347	1e-05	1e-05	1e-05	1e-05	1e-05	1e-05	6	143
PI_511980	No	NA	Calabaza	Cucurbita pepo	Sown in May, harvested in October. Prepare sweets from flesh, toast or grind seeds.	NA	Landrace	NA	1e-05	0.986058	0.002854	0.011018	1e-05	1e-05	1e-05	1e-05	1e-05	1e-05	6	80
PI_540907	No	Unknown	127	Cucurbita pepo var. texana	Received from Northrup-King. Quantity of seeds, 327.	NA	Cultivated material	NA	1e-05	1e-05	0.99991	1e-05	1e-05	1e-05	1e-05	1e-05	1e-05	1e-05	2	421
PI_251791	No	Unknown	NA	Cucurbita pepo	Source unknown.	NA	Uncertain improvement status	NA	1e-05	1e-05	0.015309	1e-05	0.817371	1e-05	1e-05	0.16725	1e-05	1e-05	3	266
PI_511979	No	NA	Vavuli Calabaza Serrana	Cucurbita pepo	Vavuli (Mt. Pima Indian), Calabaza Serrana (Spanish). Sown in May, harvested in October. Plants rainfed and fertilized. Cook mature flesh as sweets, toast or grind seeds for sauces.	NA	Landrace	NA	1e-05	0.936115	1e-05	0.03068	1e-05	1e-05	1e-05	1e-05	1e-05	0.033135	6	98
PI_420331	No	NA	Turkey	Cucurbita pepo	Seedcoat thin, white.	NA	Landrace	NA	1e-05	1e-05	0.020487	0.025978	0.083054	1e-05	0.037706	0.213206	0.031456	0.588083	1	627
PI_420328	No	NA	Turkey	Cucurbita pepo	Seedcoat thin, white.	NA	Landrace	NA	0.008159	1e-05	0.031465	0.003897	0.077192	1e-05	0.004522	0.193298	0.069758	0.61169	1	628
PI_420329	No	NA	Turkey	Cucurbita pepo	Seedcoat segregating for thickness, white.	NA	Landrace	NA	0.039886	0.043021	0.028812	1e-05	0.10222	0.021127	0.009248	0.161461	0.011881	0.582335	1	616
PI_420330	No	NA	Turkey	Cucurbita pepo	Seedcoat very thin, silver.	NA	Landrace	NA	1e-05	1e-05	0.03108	1e-05	0.012975	1e-05	0.037428	0.34827	0.002257	0.56795	1	603
PI_420332	No	NA	Turkey	Cucurbita pepo	Seedcoat segregating for thickness, white.	NA	Landrace	NA	1e-05	1e-05	0.046896	1e-05	0.119715	1e-05	0.037208	0.245166	1e-05	0.550965	1	631
PI_511969	No	NA	Calabaza	Cucurbita pepo	Sown June, harvested September/October. Cook mature flesh, toast seeds or grind for sauces.	NA	Landrace	NA	1e-05	0.965979	1e-05	0.033941	1e-05	1e-05	1e-05	1e-05	1e-05	1e-05	6	94
PI_379307	No	Serbia	Tikvica	Cucurbita pepo	NA	NA	Landrace	NA	0.004502	1e-05	1e-05	1e-05	0.660483	1e-05	0.007449	0.327505	1e-05	1e-05	3	273
PI_512870	No	Spain	V-CU-99	Cucurbita pepo	Sown March, harvested June-July. Self-consumption.	NA	Cultivar	Europe	NA	NA	NA	NA	NA	NA	NA	NA	NA	NA	NA	NA
PI_601144	No	United States	Bushkin	Cucurbita pepo	Summer (vegetable marrow) type pumpkin. Cotyledon: 46 mm long, 28 mm wide, rounded apex, plainly visible veining, medium green color. Plant: semi-bush and prickly. Main stem: angled, 52 mm diameter at midpoint of first internode, 105 cm average length, 22 internodes on average. Leaves: broad triangular, deep lobed, dentate and frilled margin, 38 cm wide, 30 cm long, smooth surface, dorsal and ven…	Pumpkin	Cultivar	North America	NA	NA	NA	NA	NA	NA	NA	NA	NA	NA	NA	NA
PI_601193	No	United States	Swan White Table Queen	Cucurbita pepo	Winter type squash. Cotyledon: 43 mm long and 28 mm wide (measured at appearance of second leaf bud), rounded apex, plainly visible veining, medium green with light green veining. Plant: semi-bush and prickly. Main stem: round, ridged, 15 mm diameter at midpoint of first internode, 260 cm average length, 34 internodes on average. Leaves: ovate and deep lobed shape, denticulate and flat margin, 38…	Acorn	Cultivar	North America	NA	NA	NA	NA	NA	NA	NA	NA	NA	NA	NA	NA
PI_302418	No	United States	Omaha Pumpkin	Cucurbita pepo	Short globose or obovate fruit, 9 to 10 inches by 5 to 7 inches, skin orange, flesh orange 1 to 1.5 inches thick. Reported to have resistance to pickleworm.	Pumpkin	Cultivar	North America	NA	NA	NA	NA	NA	NA	NA	NA	NA	NA	NA	NA
NSL_180768	No	United States	CONFEDERATE GOLD	Cucurbita pepo	Confederate Gold (16D-14) - Breeder and vendor: Ferry-Morse Seed Co. Characteristics: open pollinated, yellow crookneck type with very uniform, attractive fruits; plants large, vigorous, medium open. Similar: Yellow Summer Crookneck Improved. Adaptation: southeast United States. 1982.	Crook	Cultivar	North America	NA	NA	NA	NA	NA	NA	NA	NA	NA	NA	NA	NA
PI_512886	No	Spain	V-CU-125	Cucurbita pepo	Sown May, harvested October. Used for hay.	NA	Cultivar	Europe	NA	NA	NA	NA	NA	NA	NA	NA	NA	NA	NA	NA
NSL_98075	No	United States	TABLE KING	Cucurbita pepo	NA	Acorn	Cultivar	North America	NA	NA	NA	NA	NA	NA	NA	NA	NA	NA	NA	NA
PI_615107	No	United States	Tarahumara Indian	Cucurbita pepo	NA	NA	Cultivar	North America	NA	NA	NA	NA	NA	NA	NA	NA	NA	NA	NA	NA
PI_595838	No	United States	Saffron Prolific Straightneck	Cucurbita pepo	Butter yellow semi-crookneck. Typically picked at 6 inch length. Compact bush plant has open structure, making for easy picking. Notably smaller bush than other semi-crooknecks. Large leaves provide fruit with excellent protection from sunburn.	Crook	Cultivar	North America	NA	NA	NA	NA	NA	NA	NA	NA	NA	NA	NA	NA
PI_234618	No	Australia	Long White Bush	Cucurbita pepo	NA	NA	Cultivar	Australia	NA	NA	NA	NA	NA	NA	NA	NA	NA	NA	NA	NA
PI_267757	No	United States	Buff Pie	Cucurbita pepo	Plants vigorous, early maturing; fruit deep orange, 7 by 8.5 inches, globe, 20 faint grooves, 10 per plant. Prized for pie filling.	NA	Cultivar	North America	NA	NA	NA	NA	NA	NA	NA	NA	NA	NA	NA	NA
PI_615146	No	Ukraine	Luc	Cucurbita pepo	NA	NA	Cultivar	Europe	NA	NA	NA	NA	NA	NA	NA	NA	NA	NA	NA	NA
PI_512826	No	Spain	V-CU-32	Cucurbita pepo	Sown March, harvested October-November. Local consumption.	NA	Cultivar	Europe	NA	NA	NA	NA	NA	NA	NA	NA	NA	NA	NA	NA
PI_615145	No	Ukraine	Ukrainskaja Mnogoplodnaja	Cucurbita pepo	NA	NA	Cultivar	Europe	NA	NA	NA	NA	NA	NA	NA	NA	NA	NA	NA	NA
PI_615105	No	United States	Round Zucchini	Cucurbita pepo	NA	NA	Cultivar	North America	NA	NA	NA	NA	NA	NA	NA	NA	NA	NA	NA	NA
PI_615104	No	United States	Prostate	Cucurbita pepo	NA	NA	Cultivar	North America	NA	NA	NA	NA	NA	NA	NA	NA	NA	NA	NA	NA
PI_615089	No	United States	Austrian Bush	Cucurbita pepo	NA	NA	Cultivar	North America	NA	NA	NA	NA	NA	NA	NA	NA	NA	NA	NA	NA
PI_490275	No	United Kingdom	Little Gem	Cucurbita pepo	Plant viney. Fruit globe-shaped, smooth, orange.	NA	Cultivar	Europe	NA	NA	NA	NA	NA	NA	NA	NA	NA	NA	NA	NA
PI_512773	No	Spain	C-CU-19	Cucurbita pepo	Sown March, harvested June-July. Self-consumption.	NA	Cultivar	Europe	NA	NA	NA	NA	NA	NA	NA	NA	NA	NA	NA	NA
PI_615109	No	United Kingdom	Trailing Green Marrow	Cucurbita pepo	NA	NA	Cultivar	Europe	NA	NA	NA	NA	NA	NA	NA	NA	NA	NA	NA	NA
PI_512693	No	Spain	V-CU-106	Cucurbita pepo	Sown March, harvested October. Used for self-consumption. Received as Cucurbita maxima, winter squash.	NA	Cultivar	Europe	NA	NA	NA	NA	NA	NA	NA	NA	NA	NA	NA	NA
PI_615111	No	United States	White Acorn	Cucurbita pepo	NA	Acorn	Cultivar	North America	NA	NA	NA	NA	NA	NA	NA	NA	NA	NA	NA	NA
PI_525181	No	Egypt	Eskanderani	Cucurbita pepo	NA	NA	Cultivar	Africa	NA	NA	NA	NA	NA	NA	NA	NA	NA	NA	NA	NA
PI_512822	No	Spain	V-CU-26	Cucurbita pepo	Sown February-June, harvested May. Local-consumption.	NA	Cultivar	Europe	NA	NA	NA	NA	NA	NA	NA	NA	NA	NA	NA	NA
PI_512823	No	Spain	V-CU-27	Cucurbita pepo	Sown February-June, harvested May. Local consumption.	NA	Cultivar	Europe	NA	NA	NA	NA	NA	NA	NA	NA	NA	NA	NA	NA
PI_615153	No	United States	Mandan	Cucurbita pepo	NA	NA	Cultivar	North America	NA	NA	NA	NA	NA	NA	NA	NA	NA	NA	NA	NA
PI_512831	No	Spain	V-CU-46	Cucurbita pepo	Sown April, harvested May-June. Local consumption.	NA	Cultivar	Europe	NA	NA	NA	NA	NA	NA	NA	NA	NA	NA	NA	NA
PI_600995	No	United States	Goldilocks	Cucurbita pepo	Winter type. Cotyledon 52 mm long and 30 mm wide, apex rounded, obscure veining, medium green. Plant composed of long vines, prickly. Main stem round, 19 mm in diameter at midpoint of first internode, 335 cm ave. length, ave. number of internodes 42. Leaves reniform shaped, deep lobed, margin dentate and frilled, 25 cm wide and 24 cm long at third internode, ave. of 25 per plant, smooth surface, …	Pumpkin	Cultivar	North America	NA	NA	NA	NA	NA	NA	NA	NA	NA	NA	NA	NA
PI_531319	No	Hungary	Ve Csesi Indas	Cucurbita pepo	NA	NA	Cultivar	Europe	NA	NA	NA	NA	NA	NA	NA	NA	NA	NA	NA	NA
PI_615088	No	United States	Amish Field Pie Pumpkin	Cucurbita pepo	NA	NA	Cultivar	North America	NA	NA	NA	NA	NA	NA	NA	NA	NA	NA	NA	NA
PI_615091	No	United States	Bloomfield Pumpkin	Cucurbita pepo	NA	NA	Cultivar	North America	NA	NA	NA	NA	NA	NA	NA	NA	NA	NA	NA	NA
PI_615092	No	United States	Chesnut	Cucurbita pepo	NA	NA	Cultivar	North America	NA	NA	NA	NA	NA	NA	NA	NA	NA	NA	NA	NA
PI_615093	No	United States	Fordhook	Cucurbita pepo	NA	NA	Cultivar	North America	NA	NA	NA	NA	NA	NA	NA	NA	NA	NA	NA	NA
PI_615094	No	United States	French White Bush	Cucurbita pepo	NA	NA	Cultivar	North America	NA	NA	NA	NA	NA	NA	NA	NA	NA	NA	NA	NA
NSL_98131	No	United States	Jersey Golden Acorn	Cucurbita pepo	Bush habit, fruits orange. Yellow pigmentation occurs prior to anthesis. As fruit grow it becomes progressively more deeply orange externally and internally. Flesh contains 2-3 times more carotenes, 4-5 times more xanthophylls, and 1.6 times more beta carotene than flesh of 'Table King'. Immature fruits not over 2 inches in diameter can be steamed and eaten whole. Baked mature fruits have superio…	Acorn	Cultivar	North America	NA	NA	NA	NA	NA	NA	NA	NA	NA	NA	NA	NA
PI_595364	No	United States	HSR 1878	Cucurbita pepo	NA	NA	Cultivar	North America	NA	NA	NA	NA	NA	NA	NA	NA	NA	NA	NA	NA
PI_615097	No	United States	Japanese Pie Pumpkin	Cucurbita pepo	NA	NA	Cultivar	North America	NA	NA	NA	NA	NA	NA	NA	NA	NA	NA	NA	NA
PI_599994	No	United States	Black Magic	Cucurbita pepo	NA	Zucchini	Cultivar	North America	NA	NA	NA	NA	NA	NA	NA	NA	NA	NA	NA	NA
PI_234616	No	South Africa	Long Green Bush	Cucurbita pepo	NA	NA	Cultivar	Africa	NA	NA	NA	NA	NA	NA	NA	NA	NA	NA	NA	NA
PI_512869	No	Spain	V-CU-98	Cucurbita pepo	Sown April, harvested August-September. Self-consumption.	NA	Cultivar	Europe	NA	NA	NA	NA	NA	NA	NA	NA	NA	NA	NA	NA
PI_512776	No	Spain	C-CU-22	Cucurbita pepo	Sown May, harvested August-September. Self-consumption.	NA	Cultivar	Europe	NA	NA	NA	NA	NA	NA	NA	NA	NA	NA	NA	NA
PI_192941	No	China	Salad Melon Special	Cucurbita pepo	NA	Spaghetti	Cultivar	Asia	NA	NA	NA	NA	NA	NA	NA	NA	NA	NA	NA	NA
HONEYNUT	No	NA	NA	NA	NA	NA	Cultivar	NA	NA	NA	NA	NA	NA	NA	NA	NA	NA	NA	NA	NA
PI_615148	No	Moldova	Sote 38	Cucurbita pepo	NA	NA	Cultivar	Europe	NA	NA	NA	NA	NA	NA	NA	NA	NA	NA	NA	NA
NSL_104548	No	United States	LITTLE BOO	Cucurbita pepo	NA	Pumpkin	Cultivar	North America	NA	NA	NA	NA	NA	NA	NA	NA	NA	NA	NA	NA
PI_537555	No	Spain	Carabassa llarga	Cucurbita pepo	Sown April-May, harvested July. Used as food. Received as Cucurbita sp.	NA	Cultivar	Europe	NA	NA	NA	NA	NA	NA	NA	NA	NA	NA	NA	NA
PI_615108	No	United States	Tender and True Marrow	Cucurbita pepo	NA	NA	Cultivar	North America	NA	NA	NA	NA	NA	NA	NA	NA	NA	NA	NA	NA
PI_508465	No	South Korea	Jewel Green	Cucurbita pepo	Vine type, extra early maturing. Fruits 20cm x 10cm, weighing 450-550 g. Fruit dark green with green-gray stripes. Delicious. Performs well under low temperature and weak light intensity.	Zucchini	Cultivar	Asia	NA	NA	NA	NA	NA	NA	NA	NA	NA	NA	NA	NA
PI_615095	No	Australia	Gem	Cucurbita pepo	NA	Gem	Cultivar	Australia	NA	NA	NA	NA	NA	NA	NA	NA	NA	NA	NA	NA
PI_615100	No	United States	Lebanon	Cucurbita pepo	NA	NA	Cultivar	North America	NA	NA	NA	NA	NA	NA	NA	NA	NA	NA	NA	NA
PI_512834	No	Spain	V-CU-50	Cucurbita pepo	Sown May, harvested July-August. Self-consumption.	NA	Cultivar	Europe	NA	NA	NA	NA	NA	NA	NA	NA	NA	NA	NA	NA
PI_615098	No	United States	Kahcona	Cucurbita pepo	NA	NA	Cultivar	North America	NA	NA	NA	NA	NA	NA	NA	NA	NA	NA	NA	NA
PI_506467	No	Ukraine	Dlinnoplodnye	Cucurbita pepo	Squash.	NA	Cultivar	Europe	NA	NA	NA	NA	NA	NA	NA	NA	NA	NA	NA	NA
PI_615106	No	United States	Showell	Cucurbita pepo	Developed by Curtis Showell.	Pumpkin	Cultivar	North America	NA	NA	NA	NA	NA	NA	NA	NA	NA	NA	NA	NA
PI_615101	No	United States	Maryland Pie Pumpkin	Cucurbita pepo	NA	NA	Cultivar	North America	NA	NA	NA	NA	NA	NA	NA	NA	NA	NA	NA	NA
PI_261780	No	France	Precoce Maraichere	Cucurbita pepo	An early type.	NA	Cultivar	Europe	NA	NA	NA	NA	NA	NA	NA	NA	NA	NA	NA	NA
PI_442791	No	South Africa	Little Gem	Cucurbita pepo	Fruits orange-yellow at maturity, weigh 140 to 225 grams. Flesh yellow, slightly fibrous, good taste. Most popular of all squashes in South Africa.	NA	Cultivar	Africa	NA	NA	NA	NA	NA	NA	NA	NA	NA	NA	NA	NA
PI_490274	No	United Kingdom	Courgette	Cucurbita pepo	Plants bushy. Fruit oblong, smooth, mottled.	NA	Cultivar	Europe	NA	NA	NA	NA	NA	NA	NA	NA	NA	NA	NA	NA
PI_615113	No	United States	Wilbur Field	Cucurbita pepo	NA	NA	Cultivar	North America	NA	NA	NA	NA	NA	NA	NA	NA	NA	NA	NA	NA
PI_232072	No	South Africa	Little Gem	Cucurbita pepo	Fruits 3.5 inches in diameter.	Gem	Cultivar	Africa	NA	NA	NA	NA	NA	NA	NA	NA	NA	NA	NA	NA
PI_615144	No	Russia	Baskirskaja 245	Cucurbita pepo	From Bashkortostan region; annual advanced cultivar, entering katalog in 1956.	NA	Cultivar	Europe	NA	NA	NA	NA	NA	NA	NA	NA	NA	NA	NA	NA
PI_506468	No	Russia	Beloplodnye	Cucurbita pepo	Squash. Russian; breeding resource, annual, entering into katalog in 1953	NA	Breeding material	Europe	NA	NA	NA	NA	NA	NA	NA	NA	NA	NA	NA	NA
PI_364240	No	Russia	Gribovskaja 14	Cucurbita pepo	Naked seed. 'Golosemyannaya 14' per VIR database; marrow type; annual advanced cultivar entering katalog in 1953.	Marrow	Cultivar	Europe	NA	NA	NA	NA	NA	NA	NA	NA	NA	NA	NA	NA
PI_512662	No	Spain	A-CU-9	Cucurbita pepo	Sown May, harvested August. Used for local consumption.Received as Cucurbita maxima, winter squash.	NA	Cultivar	Europe	NA	NA	NA	NA	NA	NA	NA	NA	NA	NA	NA	NA
PI_615114	No	United States	Golden Bush Scallop	Cucurbita pepo	NA	Scallop	Cultivar	North America	NA	NA	NA	NA	NA	NA	NA	NA	NA	NA	NA	NA
HONEYNUT	No	NA	NA	NA	NA	NA	Cultivar	NA	NA	NA	NA	NA	NA	NA	NA	NA	NA	NA	NA	NA
PI_512701	No	Spain	A-CU-6	Cucurbita pepo	Sown May, harvested September. Used for local consumption.	NA	Cultivar	Europe	NA	NA	NA	NA	NA	NA	NA	NA	NA	NA	NA	NA
PI_615116	No	United States	Zikusa	Cucurbita pepo	NA	NA	Cultivar	North America	NA	NA	NA	NA	NA	NA	NA	NA	NA	NA	NA	NA
PI_512780	No	Spain	C-CU-26	Cucurbita pepo	Sown March, harvested July-August. Self-consumption.	NA	Cultivar	Europe	NA	NA	NA	NA	NA	NA	NA	NA	NA	NA	NA	NA
PI_615117	No	Mexico	Calabaza mayera	Cucurbita pepo	NA	NA	Cultivar	South/Latin America	NA	NA	NA	NA	NA	NA	NA	NA	NA	NA	NA	NA
PI_615115	No	United States	Yellow Scallop	Cucurbita pepo	NA	Scallop	Cultivar	North America	NA	NA	NA	NA	NA	NA	NA	NA	NA	NA	NA	NA
PI_512779	No	Spain	C-CU-25	Cucurbita pepo	Sown April-May, harvested July-August. Self-consumption.	NA	Cultivar	Europe	NA	NA	NA	NA	NA	NA	NA	NA	NA	NA	NA	NA
PI_508468	No	South Korea	Golden Zucchini	Cucurbita pepo	Donor description: Bush zucchini type. Maturity 50-55 days. Fruit cylindrical, yellow, 20-25cm long, 4-4.5cm diam., 250-300g, tasty. Flesh light yellow. Curator comment: Fruit oblong 35 to 37 cm x 10 cm wide; smooth; green speckled with yellow. Flesh cream, 1.6 cm thick; 64 hand-sib pollinations made between 7/13 and 8/2/1988; approximately 2 males:1 female; 24 fruit harvested.	Zucchini	Cultivar	Asia	NA	NA	NA	NA	NA	NA	NA	NA	NA	NA	NA	NA
PI_292014	No	Israel	White Bush Squash	Cucurbita pepo	NA	NA	Cultivar	Europe	NA	NA	NA	NA	NA	NA	NA	NA	NA	NA	NA	NA
PI_531316	No	Hungary	Indatlan Feher	Cucurbita pepo	NA	NA	Cultivar	Europe	NA	NA	NA	NA	NA	NA	NA	NA	NA	NA	NA	NA
PI_615112	No	United States	White Egyptian Zucchini	Cucurbita pepo	NA	NA	Cultivar	North America	NA	NA	NA	NA	NA	NA	NA	NA	NA	NA	NA	NA
PI_615103	No	Sweden	Oland	Cucurbita pepo	NA	NA	Cultivar	Europe	NA	NA	NA	NA	NA	NA	NA	NA	NA	NA	NA	NA
PI_597784	No	United States	Allie	Cucurbita pepo	NA	Gem	Cultivar	North America	NA	NA	NA	NA	NA	NA	NA	NA	NA	NA	NA	NA
PI_385970	No	Kenya	Dark Green Milan (Courgette)	Cucurbita pepo	High yielder. Received as Cucurbita maxima.	Zucchini	Cultivar	Africa	NA	NA	NA	NA	NA	NA	NA	NA	NA	NA	NA	NA
PI_600771	No	United States	Royal Knight	Cucurbita pepo	NA	Acorn	Cultivar	North America	NA	NA	NA	NA	NA	NA	NA	NA	NA	NA	NA	NA
PI_234614	No	South Africa	Little Gem	Cucurbita pepo	Appears to be a mixture - some fruits look like 'Little Gem', others much larger.	Gem	Cultivar	Africa	NA	NA	NA	NA	NA	NA	NA	NA	NA	NA	NA	NA
PI_531315	No	Hungary	Daki 802	Cucurbita pepo	NA	NA	Cultivar	Europe	NA	NA	NA	NA	NA	NA	NA	NA	NA	NA	NA	NA
PI_615102	No	United States	Naked Seed	Cucurbita pepo	NA	NA	Cultivar	North America	NA	NA	NA	NA	NA	NA	NA	NA	NA	NA	NA	NA
NSL_199054	No	United States	Precocious Early Prolific	Cucurbita pepo	PEP is an inbred line that carries gene B (BB). It is iso- genic to "Early Prolific Straightneck" (B+B+). Reference: Shifriss, O. 1981. Origin, expression, and significance of gene B in Cucurbita pepo L. J. American Hort. Sci. 106:220-232. See page 222, left column, line 16 from top. (The foregoing capital "B's" have an underscore and the "+'s" are superscripts.)	NA	Breeding material	North America	NA	NA	NA	NA	NA	NA	NA	NA	NA	NA	NA	NA
PI_93458	No	China	NA	Cucurbita pepo	Commercial varieties, collected in Harbin in March 1931, and introduced for the use of department specialists. Seeds purchased through Peter Liu, Peiping. Received May 22, 1931.	NA	Cultivar	Asia	NA	NA	NA	NA	NA	NA	NA	NA	NA	NA	NA	NA
PI_508467	No	South Korea	Bulam House	Cucurbita pepo	Bush zucchini type grown in or outdoors. Maturity 50-55 days. Fruit cylindrical, waxy, light green, 25-27cm long, 4-5cm diam., 260-310g, crispy, tasty. Flesh white. Cold tolerant.	NA	Cultivar	Asia	NA	NA	NA	NA	NA	NA	NA	NA	NA	NA	NA	NA
PI_615096	No	United States	Idaho Gem Pumpkin	Cucurbita pepo	NA	NA	Cultivar	North America	NA	NA	NA	NA	NA	NA	NA	NA	NA	NA	NA	NA
PI_615147	No	Russia	Belyje 13	Cucurbita pepo	Breeding resource from Russia entering into katalog in 1953 per VIR database.	NA	Cultivar	Europe	NA	NA	NA	NA	NA	NA	NA	NA	NA	NA	NA	NA
PI_379314	Yes	Macedonia	Tikvica	Cucurbita pepo	NA	NA	Landrace	Europe	NA	NA	NA	NA	NA	NA	NA	NA	NA	NA	NA	NA
PI_615110	No	United States	Uncle Herman Pumpkin	Cucurbita pepo	NA	Pumpkin	Cultivar	North America	NA	NA	NA	NA	NA	NA	NA	NA	NA	NA	NA	NA
PI_381323	No	Japan	Vegetable Spaghetti	Cucurbita pepo	Received as C. maxima.	Spaghetti	Cultivar	Asia	NA	NA	NA	NA	NA	NA	NA	NA	NA	NA	NA	NA
PI_512665	No	Spain	AN-CU-13	Cucurbita pepo	Sown May, harvested September-October. Received as Cucurbita maxima, winter squash.	NA	Cultivar	Europe	NA	NA	NA	NA	NA	NA	NA	NA	NA	NA	NA	NA
PI_615099	No	United States	King of the Mammoths	Cucurbita pepo	NA	NA	Cultivar	North America	NA	NA	NA	NA	NA	NA	NA	NA	NA	NA	NA	NA
PI_442792	No	South Africa	Rolet	Cucurbita pepo	Fruits remain dark green, size of large orange.	Gem	Cultivar	Africa	NA	NA	NA	NA	NA	NA	NA	NA	NA	NA	NA	NA
PI_531320	No	Hungary	Ovari Feher	Cucurbita pepo	Received as C. pepo convar. melopepo L. provar. patisonia Greb. (patty pan type)	NA	Cultivar	Europe	NA	NA	NA	NA	NA	NA	NA	NA	NA	NA	NA	NA
PI_531323	No	Hungary	Szentesi Oliva	Cucurbita pepo subsp. pepo	Received as C. pepo var. styriaca.	Marrow	Cultivar	Europe	NA	NA	NA	NA	NA	NA	NA	NA	NA	NA	NA	NA
PI_385969	No	Kenya	Ambassador F1 Hybrid	Cucurbita pepo	Intense dark green fruit, almost black. Nonrunning (bush type), excellent keeping quality. Received as Cucurbita maxima. Ambassador (189-180-4) - Breeder: Petoseed Co. Parentage: hybrid of two inbreds. Characteristics: very early Zucchini type; open habit; very prolific; good cylindrical shape; straight. Similar: Zucchini Hybrid but darker green. Adaptation: wide. 1967.	Zucchini	Cultivar	Africa	NA	NA	NA	NA	NA	NA	NA	NA	NA	NA	NA	NA
PI_299575	No	South Africa	Little Gem	Cucurbita pepo	NA	Gem	Cultivar	Africa	NA	NA	NA	NA	NA	NA	NA	NA	NA	NA	NA	NA
PI_508469	No	South Korea	Zucchini	Cucurbita pepo	Bush type, compact. Fruits cylindrical, elongated, smooth, very dark green with greenish white flesh. Very prolific under indoor forcing. Texture and taste very good. Cold tolerant .	Zucchini	Cultivar	Asia	NA	NA	NA	NA	NA	NA	NA	NA	NA	NA	NA	NA
PI_234615	No	South Africa	Long White Bush	Cucurbita pepo	NA	NA	Cultivar	Africa	NA	NA	NA	NA	NA	NA	NA	NA	NA	NA	NA	NA

## Sheet: moschata_meta
accession_id	removed	country	accession_name	taxonomy	narrative	cultivar_class	improvement_status	region	1	2	3	4	5	6	grp	pos
PI_451835	No	Guatemala	NA	Cucurbita moschata	Fruit star-shaped. Local name Ayote.	NA	NA	South/Latin America	1e-05	0.99995	1e-05	1e-05	1e-05	1e-05	2	229
PI_438579	No	Guatemala	HW 0179	Cucurbita moschata	NA	NA	NA	South/Latin America	1e-05	0.999943	1.7e-05	1e-05	1e-05	1e-05	2	223
PI_195312	No	Guatemala	2646	Cucurbita moschata	NA	NA	NA	South/Latin America	0.151568	0.40958	0.054557	0.131246	0.066633	0.186416	6	30
PI_438578	No	Guatemala	HW 0179	Cucurbita moschata	Commonly called Ayote.	NA	NA	South/Latin America	1e-05	0.747615	0.029921	0.014187	1e-05	0.208257	2	205
PI_312125	No	Guatemala	AYOTE	Cucurbita moschata	NA	NA	NA	South/Latin America	1e-05	0.919757	0.022055	1e-05	1e-05	0.058159	2	230
PI_449348	No	Guatemala	NA	Cucurbita moschata	Local name Ixchilcum.	NA	NA	South/Latin America	1e-05	0.911523	1e-05	1e-05	1e-05	0.088437	2	232
PI_449349	No	Guatemala	NA	Cucurbita moschata	Local name Pepita.	NA	NA	South/Latin America	1e-05	0.921291	1e-05	1e-05	1e-05	0.078669	2	234
PI_451839	No	Guatemala	NA	Cucurbita moschata	Fruit figure 8-shaped with upper half ribbed. Local name Ayote.	NA	NA	South/Latin America	1e-05	0.99995	1e-05	1e-05	1e-05	1e-05	2	228
PI_451846	No	Guatemala	NA	Cucurbita moschata	Fruit small, round. Local name Ayote.	NA	NA	South/Latin America	0.026438	0.571447	0.01295	0.36911	1e-05	0.020045	2	200
PI_194570	No	Guatemala	2543	Cucurbita moschata	NA	NA	NA	South/Latin America	1e-05	0.916969	1e-05	1e-05	1e-05	0.082991	2	233
PI_489695	No	Guatemala	K801-30	Cucurbita moschata	Fruits large, bottle-gourd shape, dark tan with few spots, 1.6kg. Local name Ayote.	NA	Cultivated material	South/Latin America	1e-05	0.609095	1e-05	0.009001	1e-05	0.381873	1	284
PI_197154	No	Guatemala	AYOTE	Cucurbita moschata	NA	NA	NA	South/Latin America	0.17948	0.110124	0.225651	0.271193	0.070903	0.142649	6	34
PI_458746	No	Guatemala	M 27172	Cucurbita moschata	Fruit 2.6kg, whitish, shaped like acorn squash. Received as Cucurbita sp. Local name Ayote.	NA	NA	South/Latin America	0.018333	0.821233	0.002933	1e-05	1e-05	0.15748	2	204
Grif_14225	No	Guatemala	Grif 14225	Cucurbita moschata	NA	NA	Cultivated material	South/Latin America	0.008152	0.843167	0.017994	0.122774	1e-05	0.007903	2	212
PI_489694	No	Guatemala	K801-27	Cucurbita moschata	Warm, humid area. Fruits large, round, cream colored. Flesh about 3cm thick, dark orange. Seeds with deep brown margin. Local name Ayote.	NA	Cultivated material	South/Latin America	1e-05	0.134201	1e-05	0.075363	0.01365	0.776766	1	235
PI_451845	No	Guatemala	NA	Cucurbita moschata	Fruit pear-shaped. Local name Ayote.	NA	NA	South/Latin America	1e-05	0.487759	0.072885	0.439326	1e-05	1e-05	2	196
PI_458745	No	Guatemala	M 27171	Cucurbita moschata	Fruit 2.8kg, long. Received as Cucurbita sp. Local name Ayote.	NA	NA	South/Latin America	1e-05	0.99995	1e-05	1e-05	1e-05	1e-05	2	225
PI_451841	No	Guatemala	NA	Cucurbita moschata	Fruit crook-neck shaped. Local name Ayote.	NA	NA	South/Latin America	1e-05	0.99995	1e-05	1e-05	1e-05	1e-05	2	227
PI_451848	No	Guatemala	NA	Cucurbita moschata	Local name Ayote.	NA	NA	South/Latin America	1e-05	0.99995	1e-05	1e-05	1e-05	1e-05	2	226
PI_200737	No	Guatemala	3512	Cucurbita moschata	NA	NA	NA	South/Latin America	1e-05	0.910653	1e-05	1e-05	1e-05	0.089307	2	231
PI_381808	No	India	P-5	Cucurbita moschata	NA	NA	NA	Asia	1e-05	1e-05	0.99995	1e-05	1e-05	1e-05	5	60
PI_174819	No	India	KADU	Cucurbita moschata	fruit flattened, 12 by 15in, buff with paler spots, deeply ribbed	NA	NA	Asia	1e-05	1e-05	0.99995	1e-05	1e-05	1e-05	5	66
PI_164168	No	India	KADU	Cucurbita moschata	Good keeper, but flesh of poor quality	NA	NA	Asia	0.014903	0.535052	0.450015	1e-05	1e-05	1e-05	2	202
PI_164312	No	India	PUSHNIKAI	Cucurbita moschata	NA	NA	NA	Asia	0.24935	0.246238	0.291265	0.03653	0.010573	0.166044	6	35
PI_271345	No	India	Indor	Cucurbita moschata	Received as Cucurbita maxima.	NA	NA	Asia	1e-05	1e-05	0.99995	1e-05	1e-05	1e-05	5	67
Grif_5606	No	India	USM 298	Cucurbita moschata	NA	NA	NA	Asia	1e-05	1e-05	0.99995	1e-05	1e-05	1e-05	5	70
PI_163230	No	India	Kadu	Cucurbita moschata	NA	NA	NA	Asia	0.328622	0.139787	0.4933	0.0257	1e-05	0.012581	5	49
Grif_14488	No	India	CP-99-02	Cucurbita moschata	NA	NA	Uncertain improvement status	Asia	1e-05	1e-05	0.99995	1e-05	1e-05	1e-05	5	62
PI_271341	No	India	NA	Cucurbita moschata	NA	NA	NA	Asia	0.726976	1e-05	0.272984	1e-05	1e-05	1e-05	6	20
PI_381807	No	India	P-4	Cucurbita moschata	NA	NA	NA	Asia	1e-05	1e-05	0.99995	1e-05	1e-05	1e-05	5	59
PI_381818	No	India	P-22	Cucurbita moschata	NA	NA	NA	Asia	0.334508	0.062892	0.404082	1e-05	0.163944	0.034564	5	44
PI_165575	No	India	KADU	Cucurbita moschata	Fruit flattened, 15in across, heavily ribbed, pale-buff	NA	NA	Asia	0.389673	1e-05	0.610287	1e-05	1e-05	1e-05	5	50
PI_214156	No	India	KUMBALKA 13453	Cucurbita moschata	Yellow, ribbed, oblate medium-sized; cooked and eaten as a vegetable	NA	NA	Asia	0.40937	0.077211	0.422847	1e-05	0.090553	1e-05	5	42
PI_174817	No	India	KADU	Cucurbita moschata	Fruit buff, spotted with white	NA	NA	Asia	0.324649	0.044143	0.251129	0.380059	1e-05	1e-05	6	39
PI_174818	No	India	9865	Cucurbita moschata	Fruit subelongate, 15 by 12in, buff, deeply ribbed	NA	NA	Asia	1e-05	1e-05	0.010095	1e-05	0.989865	1e-05	4	122
PI_381812	No	India	P-11	Cucurbita moschata	NA	NA	NA	Asia	1e-05	1e-05	0.99995	1e-05	1e-05	1e-05	5	63
PI_271338	No	India	Indor	Cucurbita moschata	NA	NA	NA	Asia	0.414503	1e-05	0.585457	1e-05	1e-05	1e-05	5	51
PI_165995	No	India	KADU	Cucurbita moschata	Fruit subglobose, 10in in diameter, buff	NA	NA	Asia	0.174484	0.216716	0.569787	0.038993	1e-05	1e-05	5	57
PI_381820	No	India	P-25	Cucurbita moschata	NA	NA	NA	Asia	0.254975	1e-05	0.744985	1e-05	1e-05	1e-05	5	54
PI_381817	No	India	P-20	Cucurbita moschata	NA	NA	NA	Asia	1e-05	1e-05	0.99995	1e-05	1e-05	1e-05	5	64
PI_165561	No	India	KADU	Cucurbita moschata	NA	NA	NA	Asia	0.266693	1e-05	0.733267	1e-05	1e-05	1e-05	5	53
PI_381819	No	India	P-23	Cucurbita moschata	NA	NA	NA	Asia	1e-05	1e-05	0.99995	1e-05	1e-05	1e-05	5	65
Grif_5603	No	India	USM 109	Cucurbita moschata	NA	NA	NA	Asia	1e-05	1e-05	0.99995	1e-05	1e-05	1e-05	5	71
PI_212899	No	India	13474	Cucurbita moschata	NA	NA	NA	Asia	0.239324	1e-05	0.760636	1e-05	1e-05	1e-05	5	52
PI_381815	No	India	P-16	Cucurbita moschata	NA	NA	NA	Asia	0.35427	0.06331	0.37583	0.022969	0.16041	0.023211	5	45
PI_381814	No	India	P-15	Cucurbita moschata	NA	NA	NA	Asia	1e-05	1e-05	0.99995	1e-05	1e-05	1e-05	5	61
PI_267753	No	United States	G8754	Cucurbita moschata	Plants vigorous, midseason variety; fruit 22in long with 10in bulk and 8in neck, 10-20 grooves, tan netted, green, waxy; flesh 3in thick, orange. 3 large fruits per plant, often weighing over 100lbs.	NA	NA	North America	0.860707	1e-05	0.107988	0.031275	1e-05	1e-05	6	25
PI_201772	No	United States	NA	Cucurbita moschata	NA	NA	Wild material	North America	0.410486	0.24381	0.145585	0.193005	1e-05	0.007104	6	41
PI_358507	No	United States	GOLDEN CUSHAW	Cucurbita moschata	NA	NA	NA	North America	0.645858	0.298486	1e-05	0.007008	0.009214	0.039424	6	1
PI_267752	No	United States	G8753	Cucurbita moschata	Plants medium vigor, midseason variety leaf small; fruit 14in long with 6in bulb and 4in neck; light green, long, slender, smooth, curved neck; flesh orange; seed brown.	NA	NA	North America	0.774194	0.132951	1e-05	1e-05	0.032219	0.060616	6	13
PI_427213	No	United States	NA	Cucurbita moschata	Flattened at blossom end and tapers gradually to stem end, weight 2kg, brownish orange.	NA	NA	North America	0.702315	0.274324	1e-05	1e-05	0.023331	1e-05	6	8
Grif_15151	No	United States	Cow Pumpkin	Cucurbita moschata	"Jack o'latern shaped", solid green at first maturing to an orange tan, fairly good table quality, large seed cavity, thin fruit walls. Probably polymorphic.	NA	Uncertain improvement status	North America	0.581539	0.289713	1e-05	1e-05	0.028178	0.10055	6	3
Grif_9457	No	United States	TWW 119	Cucurbita moschata	Shows good resistance to powdery mildew.	NA	NA	North America	0.364123	0.410494	1e-05	0.032446	0.037371	0.155556	6	28
PI_427214	No	United States	NA	Cucurbita moschata	Brittingham. Vine type. Fruit depressed globose, weight 2kg, brownish orange. Used for pies.	NA	NA	North America	0.628594	0.272864	1e-05	1e-05	0.031328	0.067193	6	2
PI_427212	No	United States	NA	Cucurbita moschata	Large Butternut Squash. Elongate cylindrical, curved, blossom end bulbous, 10cm diameter. Used for pies.	NA	NA	North America	0.689456	0.271774	1e-05	1e-05	0.03874	1e-05	6	7
PI_326320	No	United States	WHITE AFRICAN	Cucurbita moschata	Vine trailing; fruit white, 10 to 20 pounds. Good table quality; good winter keeper.	NA	NA	North America	0.99995	1e-05	1e-05	1e-05	1e-05	1e-05	6	11
PI_419137	No	China	NA	Cucurbita moschata	Sweet type	NA	NA	Asia	1e-05	1e-05	0.646447	0.353513	1e-05	1e-05	5	78
PI_419083	No	China	Mou Pan	Cucurbita moschata	NA	NA	NA	Asia	0.012565	1e-05	0.608696	0.365031	0.013688	1e-05	5	76
Grif_1583	No	China	FENG ZHEN FAN GUA	Cucurbita moschata	NA	NA	NA	Asia	0.1784	1e-05	1e-05	1e-05	1e-05	0.82156	1	242
PI_419202	No	China	NA	Cucurbita moschata	NA	NA	NA	Asia	1e-05	1e-05	0.666772	0.333188	1e-05	1e-05	5	79
PI_634695	No	China	ZHAN YANG XI HU LU	Cucurbita moschata	NA	NA	NA	Asia	0.175968	1e-05	1e-05	1e-05	1e-05	0.823992	1	243
PI_418965	No	China	Sui-De-Fu	Cucurbita moschata	Fruit round, sweet. Midseason.	NA	NA	Asia	1e-05	1e-05	0.622286	0.377674	1e-05	1e-05	5	77
Grif_1738	No	Nepal	Grif 1738	Cucurbita moschata	Identifications by Dr. C. R. Gunn.	NA	NA	Asia	1e-05	1e-05	0.99995	1e-05	1e-05	1e-05	5	68
PI_634705	No	Nepal	8083	Cucurbita moschata	NA	NA	Uncertain improvement status	Asia	1e-05	1e-05	0.99995	1e-05	1e-05	1e-05	5	73
Grif_935	No	Nepal	86-44	Cucurbita moschata	Received as Cucurbita sp.	NA	NA	Asia	1e-05	1e-05	0.99995	1e-05	1e-05	1e-05	5	69
PI_135371	No	Afghanistan	4947	Cucurbita moschata	Fruit globose with an exceptionally long neck (13in), 22in in length; rind gold buff with splashes of paler gold, faintly ribbed; flesh orange, sweet, and tender; seed cavity heart-shaped, 5 by 8in, an excellent variety	NA	NA	Asia	0.685765	0.269651	0.044554	1e-05	1e-05	1e-05	6	6
PI_169415	No	Turkey	3615	Cucurbita moschata	NA	NA	NA	Europe	0.800656	1e-05	0.199304	1e-05	1e-05	1e-05	6	23
PI_174194	No	Turkey	8766	Cucurbita moschata	NA	NA	NA	Europe	0.799992	1e-05	0.199968	1e-05	1e-05	1e-05	6	22
PI_182197	No	Turkey	10624	Cucurbita moschata	NA	NA	NA	Europe	0.289504	0.340671	0.27446	0.057276	1e-05	0.038079	6	32
PI_169413	No	Turkey	3184	Cucurbita moschata	NA	NA	NA	Europe	0.99995	1e-05	1e-05	1e-05	1e-05	1e-05	6	12
PI_165033	No	Turkey	KARAKABAK	Cucurbita moschata	NA	NA	NA	Europe	0.527501	1e-05	0.420193	0.031311	0.020975	1e-05	5	48
PI_169410	No	Turkey	2111	Cucurbita moschata	Sweet type	NA	NA	Europe	0.672273	0.214136	0.113562	1e-05	1e-05	1e-05	6	5
PI_169441	No	Turkey	BOGUNLER 2196	Cucurbita moschata	NA	NA	NA	Europe	0.888508	1e-05	0.111452	1e-05	1e-05	1e-05	6	26
PI_438781	No	Mexico	HW 0179	Cucurbita moschata	Fruit ovoid, ribbed tan with buff mottling, 25cm diam., 20cm long.	NA	NA	South/Latin America	0.006934	0.07064	1e-05	0.922396	1e-05	1e-05	3	147
PI_438782	No	Mexico	HW 0179	Cucurbita moschata	Fruit flattened globose, slightly ribbed, warty, buff.	NA	NA	South/Latin America	1e-05	0.023944	1e-05	0.966997	1e-05	0.009029	3	143
PI_438784	No	Mexico	HW 0179	Cucurbita moschata	Fruit ovate, slightly ribbed, orange, 30cm diam., 30cm long.	NA	NA	South/Latin America	0.00991	0.853472	0.010223	0.126375	1e-05	1e-05	2	213
PI_312165	No	Mexico	CALABASA LECHONGA	Cucurbita moschata	NA	NA	NA	South/Latin America	1e-05	0.049421	0.007028	1e-05	1e-05	0.94352	1	268
PI_262890	No	Mexico	CALABASRO SEGUALCA	Cucurbita moschata	Fruit large, oblong, dark green; squash and seeds eaten	NA	NA	South/Latin America	0.183539	0.033137	0.139734	0.52291	0.088909	0.031771	3	173
PI_438731	No	Mexico	HW 0179	Cucurbita moschata	Fruit flattened-oblate, deeply ribbed at base, dark buff. Rind hard. Flesh medium thick, light orange. Locally called Knoc kun (Cascara dura).	NA	NA	South/Latin America	1e-05	1e-05	0.000373	1e-05	1e-05	0.999587	1	255
PI_438724	No	Mexico	HW 0179	Cucurbita moschata	Obtained from Moises Gomez. Fruit flattened ovoid, ribbed, buff. Rind hard. Flesh thick, orange. Locally called Tockun.	NA	NA	South/Latin America	1e-05	0.037132	1e-05	0.045166	0.006593	0.911089	1	245
PI_438780	No	Mexico	HW 0179	Cucurbita moschata	NA	NA	NA	South/Latin America	1e-05	1e-05	1e-05	0.99995	1e-05	1e-05	3	141
PI_442263	No	Mexico	NA	Cucurbita moschata	Fruits green, light green striped, yellow at maturity, pyriform with pronounced neck, 23cm long, 15cm diam. Rind 1 mm thick. Flesh lemon yellow. Local name Calabaza de Castilla.	NA	NA	South/Latin America	0.013007	1e-05	0.149559	0.823997	0.013417	1e-05	3	154
PI_438737	No	Mexico	HW 0179	Cucurbita moschata	Fruit large, ovoid, ribbed, light tan, mottled dark green. Rind very hard. Seeds many, plump.	NA	NA	South/Latin America	1e-05	0.007629	1e-05	1e-05	1e-05	0.992331	1	254
PI_438767	No	Mexico	HW 0179	Cucurbita moschata	Fruit bluntly obovate, shallow ribs, deep tan, 15cm long.	NA	NA	South/Latin America	1e-05	0.117183	0.026734	1e-05	1e-05	0.856054	1	238
PI_442262	No	Mexico	NA	Cucurbita moschata	Fruits tan, large, oblong, slightly bell-shaped, 40cm long, 26cm diam. Rind 2mm thick. Flesh deep orange. Local name Calabaza de Castilla.	NA	NA	South/Latin America	0.048173	0.082003	0.11277	0.715111	0.026332	0.015612	3	180
PI_438722	No	Mexico	NA	Cucurbita moschata	Obtained from F. Cardenas R. Fruit pear shaped, 1.8kg. Seeds white with dark border.	NA	NA	South/Latin America	1e-05	0.066892	0.030664	0.815516	0.046861	0.040057	3	157
PI_438788	No	Mexico	HW 0179	Cucurbita moschata	Obtained by Juan Santo.	NA	NA	South/Latin America	1e-05	1e-05	1e-05	0.99995	1e-05	1e-05	3	142
PI_438723	No	Mexico	HW 0179	Cucurbita moschata	Fruit flat, many lobed, dull yellow. Eaten when young. Locally called Kanasin.	NA	NA	South/Latin America	1e-05	1e-05	1e-05	1e-05	1e-05	0.99995	1	265
PI_438791	No	Mexico	HW 0179	Cucurbita moschata	NA	NA	NA	South/Latin America	1e-05	0.449268	1e-05	0.507071	1e-05	0.043631	2	195
PI_438725	No	Mexico	HW 0179	Cucurbita moschata	Obtained from Moises Gomez. Fruit ovoid, slightly ribbed, buff. Locally called Tockun.	NA	NA	South/Latin America	1e-05	0.049645	0.013864	1e-05	1e-05	0.936461	1	269
PI_172344	No	Mexico	PEPITO	Cucurbita moschata	Seeds are roasted, shelled, and eaten	NA	NA	South/Latin America	0.20878	0.27471	0.099622	0.146668	0.082002	0.188217	6	29
PI_438732	No	Mexico	HW 0179	Cucurbita moschata	Fruit extremely flat, deeply lobed, dark buff, reticulated dark green. Flesh thin, dark orange.	NA	NA	South/Latin America	1e-05	1e-05	1e-05	1e-05	1e-05	0.99995	1	267
PI_438733	No	Mexico	HW 0179	Cucurbita moschata	Fruit small, flat, ribbed, dark brown. Rind thin. Flesh medium thick, dark orange.	NA	NA	South/Latin America	1e-05	1e-05	1e-05	1e-05	1e-05	0.99995	1	266
PI_438735	No	Mexico	HW 0179	Cucurbita moschata	Fruit oblate-flattened, ribbed, buff. Rind hard. Many seeded.	NA	NA	South/Latin America	1e-05	0.023014	1e-05	1e-05	1e-05	0.976946	1	273
PI_438736	No	Mexico	HW 0179	Cucurbita moschata	Fruit spherical, ribbed, light tan. Rind very hard.	NA	NA	South/Latin America	1e-05	1e-05	1e-05	0.009796	1e-05	0.990164	1	253
PI_574552	No	Mexico	xmehen k'uum = early squash	Cucurbita moschata	Fruit dark green-skinned, with dark orange flesh, patty pan shaped. Seeds small, white with brown margins	NA	Landrace	South/Latin America	1e-05	1e-05	0.023306	1e-05	1e-05	0.976654	1	248
PI_442264	No	Mexico	NA	Cucurbita moschata	Fruits tan, pyriform, 25cm long, 22cm diam. Rind 0.5mm thick. Placenta deep orange. Flesh lemon yellow. Local name Calabaza de Castilla.	NA	NA	South/Latin America	1e-05	0.066186	0.1362	0.797585	1e-05	1e-05	3	155
PI_438741	No	Mexico	HW 0179	Cucurbita moschata	Fruit spherical, slightly ribbed, orange-buff. Rind hard. Flesh thin, pale orange.	NA	NA	South/Latin America	1e-05	1e-05	1e-05	1e-05	1e-05	0.99995	1	262
PI_438771	No	Mexico	HW 0179	Cucurbita moschata	Fruit club shaped, tan with dark green spots, 10cm diam., 28cm long.	NA	NA	South/Latin America	1e-05	0.029551	1e-05	1e-05	1e-05	0.970409	1	272
PI_438747	No	Mexico	HW 0179	Cucurbita moschata	NA	NA	NA	South/Latin America	1e-05	1e-05	1e-05	1e-05	1e-05	0.99995	1	263
PI_442271	No	Mexico	NA	Cucurbita moschata	Fruits light green, tan mottling, turban-shaped, 16m long, 25cm diam. Local name Calabaza.	NA	NA	South/Latin America	1e-05	0.56509	1e-05	0.379243	0.014706	0.040941	2	201
PI_438790	No	Mexico	HW 0179	Cucurbita moschata	Obtained from Jose Sinica Fiscal.	NA	NA	South/Latin America	1e-05	1e-05	1e-05	0.99995	1e-05	1e-05	3	138
PI_442273	No	Mexico	NA	Cucurbita moschata	Fruits green, light green striped, turban-shaped, 16cm long, 20cm diam.	NA	NA	South/Latin America	1e-05	1e-05	1e-05	0.959399	1e-05	0.040561	3	137
PI_438792	No	Mexico	HW 0179	Cucurbita moschata	NA	NA	NA	South/Latin America	1e-05	0.484751	1e-05	0.510952	1e-05	0.004267	2	194
PI_438794	No	Mexico	HW 0179	Cucurbita moschata	Fruit spindle shaped, light buff, 30cm diam., 64cm long.	NA	NA	South/Latin America	1e-05	1e-05	0.041985	0.914353	1e-05	0.043633	3	136
PI_438795	No	Mexico	HW 0179	Cucurbita moschata	Fruit long elliptic, shallow ribs, light buff, mottled tan and green, 20cm diam., 45cm long. Many seeds germinating. Locally called Tomala.	NA	NA	South/Latin America	1e-05	0.724563	0.04168	0.233727	1e-05	1e-05	2	193
PI_442258	No	Mexico	NA	Cucurbita moschata	Fruits dark green, tan-striped, turban-shaped, 11cm long, 18cm diam. Local name Calabaza.	NA	NA	South/Latin America	0.029175	1e-05	0.055002	0.846929	0.068874	1e-05	3	165
PI_438798	No	Mexico	HW 0179	Cucurbita moschata	Fruit long necked, 12cm diam. at widest part, 30cm long, orange buff, green on neck.	NA	NA	South/Latin America	1e-05	0.904118	1e-05	0.095842	1e-05	1e-05	2	222
PI_438799	No	Mexico	HW 0179	Cucurbita moschata	NA	NA	NA	South/Latin America	1e-05	0.832707	0.027695	0.103699	1e-05	0.03588	2	215
PI_438800	No	Mexico	HW 0179	Cucurbita moschata	NA	NA	NA	South/Latin America	1e-05	0.839073	0.003217	0.157681	1e-05	1e-05	2	207
PI_438739	No	Mexico	HW 0179	Cucurbita moschata	Fruit small, deeply ribbed at stem end, apically dome-shaped, smooth, dark orange buff, marked brown. Rind soft.	NA	NA	South/Latin America	1e-05	0.008752	0.015929	1e-05	1e-05	0.975289	1	247
PI_438802	No	Mexico	HW 0179	Cucurbita moschata	Obtained from Alfonso Lopez. Forage type.	NA	NA	South/Latin America	1e-05	0.869263	1e-05	0.130697	1e-05	1e-05	2	209
PI_438708	No	Mexico	NA	Cucurbita moschata	Locally called Tallallota.	NA	NA	South/Latin America	1e-05	0.044879	1e-05	0.867555	1e-05	0.087537	3	134
PI_438808	No	Mexico	HW 0179	Cucurbita moschata	Obtained from F. Cardenas R.	NA	NA	South/Latin America	1e-05	0.132021	1e-05	0.867939	1e-05	1e-05	3	159
PI_438748	No	Mexico	HW 0179	Cucurbita moschata	NA	NA	NA	South/Latin America	1e-05	1e-05	1e-05	1e-05	1e-05	0.99995	1	264
PI_438750	No	Mexico	HW 0179	Cucurbita moschata	NA	NA	NA	South/Latin America	1e-05	1e-05	1e-05	1e-05	1e-05	0.99995	1	261
PI_438751	No	Mexico	HW 0179	Cucurbita moschata	NA	NA	NA	South/Latin America	0.003969	0.043587	0.017522	1e-05	1e-05	0.934902	1	270
PI_438752	No	Mexico	HW 0179	Cucurbita moschata	NA	NA	NA	South/Latin America	1e-05	0.003375	1e-05	0.068413	1e-05	0.928182	1	244
PI_438753	No	Mexico	HW 0179	Cucurbita moschata	Fruit flat, 10 lobed, 25cm diam., tan with dark green reticulations.	NA	NA	South/Latin America	1e-05	0.006522	1e-05	0.004178	0.011146	0.978133	1	250
PI_438796	No	Mexico	HW 0179	Cucurbita moschata	Seeds mixed.	NA	NA	South/Latin America	1e-05	0.807469	0.044951	0.147255	1e-05	0.000306	2	206
PI_442278	No	Mexico	NA	Cucurbita moschata	Fruits dark tan, black mottling, slight bloom, turban-shaped, 12cm long, 14cm diam. Local name Calabaza.	NA	NA	South/Latin America	1e-05	0.142466	1e-05	0.842786	0.014718	1e-05	3	158
PI_438759	No	Mexico	HW 0179	Cucurbita moschata	Fruit flattened ovate, shallow ribs, white, 23cm diam.	NA	NA	South/Latin America	1e-05	0.064693	0.023415	1e-05	1e-05	0.911862	1	240
PI_438760	No	Mexico	HW 0179	Cucurbita moschata	Fruit ovoid, shallow ribs, white, 17cm diam., 23cm long. Flesh cream.	NA	NA	South/Latin America	1e-05	1e-05	0.001223	0.452822	0.011816	0.53412	1	281
PI_442247	No	Mexico	NA	Cucurbita moschata	Vines. Fruits light tan, slightly green mottled, 16cm long, 18cm diam. Local name Calabasa.	NA	NA	South/Latin America	0.032745	1e-05	1e-05	0.886444	0.080781	1e-05	3	161
PI_438770	No	Mexico	HW 0179	Cucurbita moschata	Fruit short club shaped, ribbed, neck 11.5cm diam., 15cm long, body 23cm diam., 13cm long.	NA	NA	South/Latin America	1e-05	0.245095	1e-05	0.139861	1e-05	0.615014	1	283
PI_438743	No	Mexico	HW 0179	Cucurbita moschata	Fruit large, curved, club-shaped, ribbed, pale tan, 15cm diam., 45cm long. Rind hard. Flesh thin, dark orange.	NA	NA	South/Latin America	1e-05	0.093746	1e-05	0.002833	1e-05	0.903391	1	239
PI_438772	No	Mexico	HW 0179	Cucurbita moschata	Fruit globose, smooth, striped and reticulated dark green, 20cm long.	NA	NA	South/Latin America	1e-05	0.42264	0.012191	0.132401	1e-05	0.432748	1	286
PI_438773	No	Mexico	HW 0179	Cucurbita moschata	Fruit flattened globose, deeply ribbed, buff, 20cm diam.	NA	NA	South/Latin America	1e-05	0.204398	1e-05	0.014959	1e-05	0.780613	1	236
PI_438775	No	Mexico	HW 0179	Cucurbita moschata	NA	NA	NA	South/Latin America	1e-05	0.066248	1e-05	0.531246	1e-05	0.402476	1	279
PI_438776	No	Mexico	HW 0179	Cucurbita moschata	NA	NA	NA	South/Latin America	1e-05	0.037954	0.006254	0.395395	1e-05	0.560377	1	280
PI_438777	No	Mexico	HW 0179	Cucurbita moschata	Seeds large.	NA	NA	South/Latin America	1e-05	0.179185	0.020296	0.571694	1e-05	0.228805	3	182
PI_438778	No	Mexico	HW 0179	Cucurbita moschata	NA	NA	NA	South/Latin America	1e-05	0.040864	0.011986	0.04089	1e-05	0.90624	1	246
PI_438779	No	Mexico	HW 0179	Cucurbita moschata	NA	NA	NA	South/Latin America	1e-05	0.045358	0.024075	0.885882	0.015478	0.029198	3	149
PI_438756	No	Mexico	HW 0179	Cucurbita moschata	Fruit oblate, deeply lobed, warty, 25cm diam.	NA	NA	South/Latin America	1e-05	0.013961	1e-05	0.005907	0.027993	0.952118	1	271
PI_442280	No	Mexico	NA	Cucurbita moschata	Fruits tan, dark green mottling, slight bloom, Canadian Crookneck shape, 31cm long, 13cm diam.	NA	NA	South/Latin America	1e-05	0.128468	0.017726	0.853776	1e-05	1e-05	3	160
PI_442283	No	Mexico	NA	Cucurbita moschata	Fruits tan, dark green mottling, tan mottling at maturity, turban-shaped, 15.8 long, 20cm diam. Local name Calabaza criolla.	NA	NA	South/Latin America	0.042589	0.389772	0.048422	0.516454	0.002753	1e-05	3	186
PI_442284	No	Mexico	NA	Cucurbita moschata	Fruits dark tan, ovate, 20cm long, 18.4cm diam. Local name Calabaza criolla.	NA	NA	South/Latin America	1e-05	0.99995	1e-05	1e-05	1e-05	1e-05	2	224
PI_438785	No	Mexico	HW 0179	Cucurbita moschata	Fruit elliptical, slightly ribbed, orange marked green, 28cm diam., 46cm long.	NA	NA	South/Latin America	1e-05	1e-05	1e-05	0.99995	1e-05	1e-05	3	140
PI_442249	No	Mexico	NA	Cucurbita moschata	Local name Calabaza.	NA	NA	South/Latin America	0.056744	1e-05	0.007319	0.877874	0.058042	1e-05	3	162
PI_438787	No	Mexico	HW 0179	Cucurbita moschata	Fruit depressed globose, ribbed. Rind soft, mottled green and tan, 33cm diam., 20cm long.	NA	NA	South/Latin America	1e-05	0.019387	1.3e-05	0.980569	1e-05	1e-05	3	144
PI_442288	No	Mexico	NA	Cucurbita moschata	Fruits tan, dark green and tan mottled, turban-shaped, 15cm long, 22.7cm diam. Placenta brown. Flesh greenish. Local name Calabaza criolla.	NA	NA	South/Latin America	1e-05	0.89853	0.021657	0.07866	1e-05	0.001133	2	221
PI_442272	No	Mexico	NA	Cucurbita moschata	Fruits light green, tan mottling, turban-shaped, 23cm long, 22cm diam. Local name Calabaza camotuda.	NA	NA	South/Latin America	1e-05	1e-05	1e-05	0.482054	1e-05	0.517906	1	282
PI_634696	No	Mexico	Castillo	Cucurbita moschata	NA	NA	Cultivated material	South/Latin America	0.005442	0.119112	0.180479	0.6519	1e-05	0.043057	3	175
PI_442274	No	Mexico	NA	Cucurbita moschata	Fruits tan, flattened-round, warty, 14cm long, 19cm diam. Primitive type.	NA	NA	South/Latin America	1e-05	0.623817	1e-05	0.267217	1e-05	0.108937	2	188
PI_442275	No	Mexico	NA	Cucurbita moschata	Fruits mottled green and tan, heavy bloom, top-shaped, 21cm long, 15cm diam.	NA	NA	South/Latin America	0.002778	0.578	0.008495	0.343265	1e-05	0.067452	2	199
PI_442277	No	Mexico	NA	Cucurbita moschata	Fruits tan, turban-shaped, 12cm long, 19cm diam. Local name Calabaza.	NA	NA	South/Latin America	0.003629	0.568328	1e-05	0.428013	1e-05	1e-05	2	198
PI_442257	No	Mexico	NA	Cucurbita moschata	Fruits dark green, splotchy yellow at maturity, slight bloom, surface slightly lumpy, pear-shaped, 23cm long, 24cm diam. Local name Calabaza.	NA	NA	South/Latin America	1e-05	1e-05	0.022011	0.935924	0.042035	1e-05	3	145
PI_438758	No	Mexico	HW 0179	Cucurbita moschata	Fruit obovate, faintly ribbed, nearly white, 15cm diam., 25cm long.	NA	NA	South/Latin America	1e-05	1e-05	0.006658	1e-05	1e-05	0.993302	1	251
PI_512177	No	Mexico	Calabaza de Castilla.	Cucurbita moschata	Two fruits, round, slightly flattened with shallow ribs, rind dark green with tan mottling.	NA	Cultivated material	South/Latin America	0.038355	1e-05	0.044749	0.866794	0.050082	1e-05	3	166
PI_634703	No	Mexico	965b	Cucurbita moschata	Pepos purchased in market from woman from San Juan del Rio.	NA	Cultivated material	South/Latin America	1e-05	0.057174	0.025659	0.899503	0.013389	0.004264	3	148
PI_438801	No	Mexico	HW 0179	Cucurbita moschata	Vegetable variety.	NA	NA	South/Latin America	1e-05	0.872205	1e-05	0.127755	1e-05	1e-05	2	210
PI_442286	No	Mexico	NA	Cucurbita moschata	Fruits dark orange, dark green and tan mottled, bell-shaped, 16.7cm long, 13.2 cm diam. Local name Calabaza criolla.	NA	NA	South/Latin America	1e-05	0.938974	1e-05	0.053135	1e-05	0.007861	2	217
PI_438803	No	Mexico	HW 0179	Cucurbita moschata	NA	NA	NA	South/Latin America	0.441838	0.519176	0.015632	0.023335	1e-05	1e-05	6	31
PI_442250	No	Mexico	NA	Cucurbita moschata	Local name Calabaza.	Calabaza	NA	South/Latin America	0.006592	1e-05	1e-05	0.915139	0.078239	1e-05	3	146
PI_438811	No	Mexico	HW 0179	Cucurbita moschata	Fruit flat, many lobes, dull yellow. Locally called Kanasin.	NA	NA	South/Latin America	1e-05	1e-05	1e-05	1e-05	1e-05	0.99995	1	259
PI_438815	No	Mexico	HW 0179	Cucurbita moschata	Fruit flat, ribbed, dark brown with heavy bloom. Rind soft, thick. Flesh dark orange.	NA	NA	South/Latin America	1e-05	1e-05	1e-05	1e-05	1e-05	0.99995	1	260
PI_438826	No	Mexico	HW 0179	Cucurbita moschata	Locally called Tamala.	NA	NA	South/Latin America	1e-05	0.637077	0.068842	0.294051	1e-05	1e-05	2	190
PI_438827	No	Mexico	HW 0179	Cucurbita moschata	NA	NA	NA	South/Latin America	1e-05	0.732833	0.003405	0.244741	0.019002	1e-05	2	191
PI_438828	No	Mexico	HW 0179	Cucurbita moschata	Fruit depressed globose, ribbed. Rind rough, wrinkled dark buff, 25cm diam., 18 cm long.	NA	NA	South/Latin America	1e-05	0.818163	1e-05	0.181797	1e-05	1e-05	2	208
PI_634700	No	Mexico	Tamalajote	Cucurbita moschata	Pepo obtained from Sr. Donaciano Cruz Reyes. This calabasa is the more common of the two cultivated in this region and is preferred for its flesh. N.V. Tamala	NA	Cultivated material	South/Latin America	1e-05	0.354515	0.10502	0.540435	1e-05	1e-05	3	185
PI_634701	No	Mexico	944	Cucurbita moschata	Pepo obtained from Sr. Sesilio Escobar Matus. This is one of two commonly cultivated calabasas in this area. This type matures in 2 months, the fruit is highly prized for consumption when the skin has hardened, prior to this time it is not worth eating. The mature fruit color is beige, immature fruits may be white, green or green\white striped. This type provides more fruit than tamalajota, the s…	NA	Cultivated material	South/Latin America	1e-05	0.653153	0.05282	0.293997	1e-05	1e-05	2	189
PI_634702	No	Mexico	965b	Cucurbita moschata	Pepos purchased in market from woman from San Juan del Rio.	NA	Cultivated material	South/Latin America	1e-05	1e-05	0.043994	0.902004	0.020769	0.033213	3	135
PI_442268	No	Mexico	NA	Cucurbita moschata	Seed large. Local name Calabaza de Castilla.	NA	NA	South/Latin America	0.008582	0.893838	0.004691	0.055764	0.037114	1e-05	2	216
PI_511948	No	Mexico	Segualca.	Cucurbita moschata	Plants mature later and are less predictable than Cucurbita mixta. Sown in June and July, harvested in November. Cook mature fruit. Sample donated by Encornacion Torres Legarra.	NA	Landrace	South/Latin America	1e-05	0.017566	0.105176	0.877229	1e-05	1e-05	3	152
PI_442248	No	Mexico	NA	Cucurbita moschata	Fruits dark green, tan markings, bell-shaped, 15cm long, 18cm diam. Local name Calabasa.	NA	NA	South/Latin America	0.031667	1e-05	0.032243	0.864581	0.071489	1e-05	3	167
PI_532378	No	Mexico	130	Cucurbita moschata	Fruit obovate, oblong, ellipsoid, ovate or clavate 14-73cm long, 13-26.5cm wide. Some green, some warted. Flesh orange, 2.5-4cm thick. Rind soft-hard. Plant in June, harvest in December.	NA	Cultivated material	South/Latin America	1e-05	0.913853	1e-05	0.08144	1e-05	0.004677	2	220
PI_442254	No	Mexico	NA	Cucurbita moschata	Fruits dark green, light green striped, slightly bell-shaped, 25.5cm long, 16 cm diam. Local name Calabaza.	NA	NA	South/Latin America	0.074076	1e-05	0.067675	0.842444	0.015785	1e-05	3	169
PI_442251	No	Mexico	NA	Cucurbita moschata	Local name Calabaza.	NA	NA	South/Latin America	0.057439	1e-05	0.033778	0.84776	0.061002	1e-05	3	164
PI_442252	No	Mexico	NA	Cucurbita moschata	Fruits tan, pear-shaped, 28cm long, 15cm diam., cracks horizontally at maturity. Local name Calabaza.	NA	NA	South/Latin America	0.066662	1e-05	0.05848	0.840282	0.034556	1e-05	3	170
PI_442253	No	Mexico	NA	Cucurbita moschata	Fruits spheroid, tapering toward top and bottom, 21cm long, 19cm diam. Local name Calabaza.	NA	NA	South/Latin America	0.071816	1e-05	0.055239	0.824605	0.047261	0.001069	3	171
PI_512169	No	Mexico	Calabaza de Castilla.	Cucurbita moschata	Single fruit flat, round.	NA	Cultivated material	South/Latin America	0.084292	0.025834	0.1048	0.674668	0.082567	0.027839	3	178
PI_442255	No	Mexico	NA	Cucurbita moschata	Fruits tan, green striped, oblong, 22cm long, 15cm diam. Local name Calabaza.	NA	NA	South/Latin America	0.052678	0.076845	0.101605	0.766574	0.002288	1e-05	3	181
PI_449347	No	Mexico	NA	Cucurbita moschata	Local name Calabasa.	NA	NA	South/Latin America	0.030475	0.334197	1e-05	0.568265	0.067043	1e-05	3	184
PI_438830	No	Mexico	HW 0179	Cucurbita moschata	NA	NA	NA	South/Latin America	1e-05	0.857347	0.025676	0.116947	1e-05	1e-05	2	211
PI_438786	No	Mexico	HW 0179	Cucurbita moschata	Fruit depressed globose, ribbed. Rind hard, mottled tan and orange, 36cm wide, 20cm long.	NA	NA	South/Latin America	1e-05	1e-05	1e-05	0.99995	1e-05	1e-05	3	139
PI_442287	No	Mexico	NA	Cucurbita moschata	Fruits deep orange, elongate, 32cm long, 12cm diam. Placenta greenish-brown. Flesh deep orange. Local name Calabaza criolla.	NA	NA	South/Latin America	0.043982	0.289688	0.024893	0.612729	0.0287	1e-05	3	183
PI_511954	No	Mexico	Segualca.	Cucurbita moschata	Sown in June and July, harvested in October and November. Cook mature fruit as a sweet.	NA	Landrace	South/Latin America	0.008838	0.050899	0.052995	0.481267	1e-05	0.405992	1	278
PI_442265	No	Mexico	NA	Cucurbita moschata	Fruits green with white stripes, bell-shaped, 21cm long, 17.5cm diam. Local name Calabaza de Castilla.	NA	NA	South/Latin America	0.02965	0.527939	0.073141	0.36925	1e-05	1e-05	2	197
PI_512146	No	Mexico	Chinche	Cucurbita moschata	Seeds white with tan margin. Said to be produced at high elevation in the state of Mexico.	NA	Cultivated material	South/Latin America	0.003587	0.126061	0.013526	1e-05	0.013131	0.843687	1	237
PI_634698	No	Mexico	Tamalajote	Cucurbita moschata	Pepos obtained from Blas Lucano Diaz. Planted with maize in early May. N.V. Tamalajota.	NA	Cultivated material	South/Latin America	0.061189	0.156249	0.171532	0.603975	1e-05	0.007046	3	177
PI_634699	No	Mexico	Tamalajote	Cucurbita moschata	Pepos obtained from Sr. Juan Bailon, Avenida Revolucion	NA	NA	South/Latin America	0.051246	0.139191	0.196979	0.570423	0.025315	0.016846	3	176
PI_442289	No	Mexico	NA	Cucurbita moschata	NA	NA	NA	South/Latin America	0.038887	0.364875	0.030282	0.537051	0.028895	1e-05	3	187
PI_512151	No	Mexico	Pepita menuda	Cucurbita moschata	Seeds small, white with tan margin.	NA	Cultivated material	South/Latin America	1.3e-05	1e-05	0.019203	1e-05	1e-05	0.980754	1	249
PI_512161	No	Mexico	Calabaza de castilla.	Cucurbita moschata	Two fruits flask-shaped with waxy dark green rind.	NA	Cultivated material	South/Latin America	0.067937	1e-05	0.046798	0.794212	0.091033	1e-05	3	168
PI_442267	No	Mexico	NA	Cucurbita moschata	Local name Calabaza de Castilla.	NA	NA	South/Latin America	0.014299	0.041514	0.162509	0.760031	1e-05	0.021637	3	179
PI_512150	No	Mexico	Calabaza de tamala.	Cucurbita moschata	Single fruit large, club-shaped with tan rind and bright orange flesh.	NA	Cultivated material	South/Latin America	1e-05	0.707303	0.05098	0.241688	1e-05	1e-05	2	192
PI_442285	No	Mexico	NA	Cucurbita moschata	Fruits tan, dark-tan mottled, necked pyriform, 15.4cm long, 15cm diam. Local name Calabaza criolla.	NA	NA	South/Latin America	1e-05	0.915494	1e-05	0.084466	1e-05	1e-05	2	219
PI_511951	No	Mexico	Segualca.	Cucurbita moschata	Fruits diverse in shape. Sown in July, harvested in October and November. Cook mature flesh as a sweet, toast and eat seeds. Sample donated by Manuel Pina Corrales.	NA	Landrace	South/Latin America	1e-05	1e-05	0.105279	0.887333	1e-05	0.007357	3	150
PI_449345	No	Mexico	NA	Cucurbita moschata	Local name Pepita de calabasa.	NA	NA	South/Latin America	1e-05	0.927555	1e-05	0.072405	1e-05	1e-05	2	218
PI_532381	No	Mexico	161	Cucurbita moschata	Fruits acorn/heart to scallop shape, ribbed, 9-10cm long, 16.5-28cm wide. Rind hard. Flesh orange, 4-5cm thick. Immature fruits cut up and fried. Seeds of mature fruit eaten. Used for dulce.	NA	Cultivated material	South/Latin America	1e-05	1e-05	1e-05	1e-05	1e-05	0.99995	1	258
PI_511952	No	Mexico	Segualca.	Cucurbita moschata	Fruits diverse in shape. Sown in July, harvested in October and November. Cook mature flesh as a sweet, toast and eat seeds. Sample donated by Manuel Pina Corrales.	NA	Landrace	South/Latin America	1e-05	0.005503	0.117099	0.877368	1e-05	1e-05	3	153
PI_511955	No	Mexico	Segualca.	Cucurbita moschata	Plants had few fruits due to animal consumption of plants. Sown in July, harvested in October and November. Cook mature fruits. Powdery mildew present. Virus caused yellow streaks in fruit and vegetative parts. Sample donated by Lorenzo Gastelum Mazo.	NA	Landrace	South/Latin America	1e-05	1e-05	0.098293	0.880736	1e-05	0.020941	3	151
PI_532373	No	Mexico	43	Cucurbita moschata	Fruit clavate with long neck 10-47cm long, 8-13cm long, green mottlings and broken stripes with or without waxy bloom. Flesh sweet and orange. Rind soft to moderately hard. Seeds partly or readily separate from flesh.	NA	Cultivated material	South/Latin America	0.059813	1e-05	1e-05	0.863075	0.077082	1e-05	3	163
PI_449346	No	Mexico	NA	Cucurbita moschata	Local name Calabasa.	NA	NA	South/Latin America	1e-05	0.860449	1e-05	0.095483	1e-05	0.044037	2	214
PI_512147	No	Mexico	Sopoma	Cucurbita moschata	Fruit dark green, flask-shaped. Seeds white with tan margin. Favored variety for flesh quality.	NA	Cultivated material	South/Latin America	0.011475	0.143175	0.157755	0.672733	1e-05	0.014852	3	174
PI_511949	No	Mexico	Segualca.	Cucurbita moschata	Plants mature later, are less predictable and require better soil than Cucurbita mixta. Sown in June and July, harvested in November. Cook mature fruits. Sample donated by Encornacion Torres Legarra.	NA	Landrace	South/Latin America	1e-05	0.043519	0.120653	0.835798	1e-05	1e-05	3	156
PI_183258	No	Saudi Arabia	No.1	Cucurbita moschata	NA	NA	NA	Arab States	0.974622	1e-05	0.025338	1e-05	1e-05	1e-05	6	10
PI_199014	No	Africa	NA	Cucurbita moschata	Presented by Frank Pellet, Pellet Gardens, Atlantic, Iowa, in 1949	NA	NA	Africa	0.291887	0.437972	0.245528	1e-05	1e-05	0.024593	6	33
PI_200823	No	Myanmar	72	Cucurbita moschata	Fruits oblate, green with yellow spots	NA	NA	Asia	0.940554	1e-05	0.059406	1e-05	1e-05	1e-05	6	9
PI_200822	No	Myanmar	64	Cucurbita moschata	Fruits round-flattened, small, salmon, flesh bright-orange; common	NA	NA	Asia	1e-05	1e-05	0.763967	0.235993	1e-05	1e-05	5	74
PI_211998	No	Iran	NA	Cucurbita moschata	NA	NA	NA	Asia	0.163882	0.223639	0.572703	0.024091	0.015675	1e-05	5	56
PI_211999	No	Iran	NA	Cucurbita moschata	NA	NA	NA	Asia	0.856433	1e-05	0.143527	1e-05	1e-05	1e-05	6	24
PI_222760	No	Iran	NA	Cucurbita moschata	NA	NA	NA	Asia	0.46777	1e-05	0.150131	0.357725	0.015816	0.008549	6	38
PI_211993	No	Iran	RIZAIYEH	Cucurbita moschata	NA	NA	NA	Asia	0.594014	0.092654	0.135118	0.171719	1e-05	0.006485	6	40
PI_212011	No	Iran	12	Cucurbita moschata	NA	NA	NA	Asia	0.821936	1e-05	0.178024	1e-05	1e-05	1e-05	6	21
PI_249565	No	Thailand	NA	Cucurbita moschata	NA	NA	NA	Asia	0.237642	0.188167	0.311019	0.130474	0.055346	0.077353	6	37
PI_257532	No	Spain	NA	Cucurbita moschata	NA	NA	NA	Europe	0.328743	0.050514	0.460452	0.022034	0.124563	0.013694	5	43
PI_288239	No	Egypt	NA	Cucurbita moschata	Probably similar to 'Butternut' in color, but larger and very variable in shape.	NA	NA	Africa	0.200261	0.208306	0.506112	0.012564	0.041112	0.031645	5	55
PI_369346	No	Costa Rica	NA	Cucurbita moschata	NA	NA	NA	South/Latin America	0.084706	0.746428	1e-05	1e-05	1e-05	0.168836	2	203
PI_406848	No	Honduras	NA	Cucurbita moschata	NA	NA	NA	South/Latin America	1e-05	1e-05	1e-05	1e-05	1e-05	0.99995	1	257
PI_438551	No	Belize	NA	Cucurbita moschata	Fruit top-shape, whitish with tan, 26cm wide, 20cm long.	NA	NA	South/Latin America	1e-05	0.024855	1e-05	1e-05	1e-05	0.975105	1	274
PI_438553	No	Belize	Xnu Kun	Cucurbita moschata	fruit depressed globose, ribbed, dark orange-brown, 28cm in diameter.	NA	NA	South/Latin America	0.007926	0.071417	1e-05	1e-05	1e-05	0.920627	1	241
PI_438549	No	Belize	NA	Cucurbita moschata	Fruit long necked.	NA	NA	South/Latin America	1e-05	1e-05	1e-05	1e-05	1e-05	0.99995	1	256
PI_438548	No	Belize	Pepita menuda	Cucurbita moschata	NA	NA	NA	South/Latin America	1e-05	1e-05	0.009804	1e-05	1e-05	0.990156	1	252
PI_441726	No	Brazil	HTE0778	Cucurbita moschata	Fruits flattened-globose. Rind tan and green. Flesh dark orange. Local name Abobora.	NA	NA	South/Latin America	0.333667	0.065833	1e-05	0.045629	0.075546	0.479316	1	277
PI_441725	No	Brazil	HTE0778	Cucurbita moschata	Fruits elongated. Rind cream-color. Flesh bright orange. Local name Abobora.	NA	NA	South/Latin America	0.781128	1e-05	1e-05	0.013489	0.116904	0.088459	6	17
PI_441723	No	Brazil	HTE0778	Cucurbita moschata	Fruits oval. Rind greenish.	NA	NA	South/Latin America	0.754522	1e-05	1e-05	0.051907	0.142595	0.050955	6	19
PI_458728	No	Argentina	TW 1080	Cucurbita moschata	Seeds small, dirty white, margins lighter. Local name Zapallito anguito (Butternut).	NA	NA	South/Latin America	0.20989	0.001823	0.02318	0.68939	0.075707	1e-05	3	172
PI_475750	No	Paraguay	Calabazo	Cucurbita moschata	Plants grown by Manjuy Indians for centuries, endemic. Seeds banana type, buff-colored.	NA	Cultivated material	South/Latin America	0.72045	0.033345	1e-05	0.008177	0.14176	0.096258	6	18
PI_482492	No	Zimbabwe	TGR 149	Cucurbita moschata	Sown October, harvested April. Fruits whitish. Local name Fere.	NA	Cultivated material	Africa	1e-05	1e-05	1e-05	1e-05	0.99995	1e-05	4	90
PI_482488	No	Zimbabwe	TGR 27B	Cucurbita moschata	Sown November, harvested April.	NA	Cultivated material	Africa	1e-05	1e-05	1e-05	1e-05	0.99995	1e-05	4	87
PI_482491	No	Zimbabwe	TGR 148	Cucurbita moschata	Sown October, harvested April. Plants associated with Cucumis. Local name Mkoko.	NA	Cultivated material	Africa	0.031298	1e-05	0.033402	1e-05	0.93527	1e-05	4	133
PI_482513	No	Zimbabwe	TGR 699	Cucurbita moschata	Local name Nhengere (Nzunzu).	NA	Cultivated material	Africa	1e-05	1e-05	1e-05	1e-05	0.99995	1e-05	4	96
PI_482567	No	Zimbabwe	TGR 1618	Cucurbita moschata	Sown November, harvested April.	NA	Cultivated material	Africa	1e-05	1e-05	1e-05	1e-05	0.99995	1e-05	4	109
PI_482487	No	Zimbabwe	TGR 27A	Cucurbita moschata	Sown November, harvested April.	NA	Cultivated material	Africa	1e-05	1e-05	1e-05	1e-05	0.99995	1e-05	4	88
PI_482565	No	Zimbabwe	TGR 1568	Cucurbita moschata	Sown November, harvested April. Fruits creamy yellow. Local name Mhengere.	NA	Cultivated material	Africa	1e-05	1e-05	1e-05	1e-05	0.99995	1e-05	4	110
PI_482588	No	Zimbabwe	TGR 2073	Cucurbita moschata	Fruits elongated, ridged shape.	NA	Cultivated material	Africa	1e-05	1e-05	1e-05	1e-05	0.99995	1e-05	4	84
PI_482535	No	Zimbabwe	TGR 1290	Cucurbita moschata	Local name Musonde.	NA	Cultivated material	Africa	1e-05	1e-05	0.059161	1e-05	0.940799	1e-05	4	128
PI_482493	No	Zimbabwe	TGR 169	Cucurbita moschata	Sown November, harvested April.	NA	Cultivated material	Africa	1e-05	1e-05	1e-05	1e-05	0.99995	1e-05	4	89
PI_482586	No	Zimbabwe	TGR 1963	Cucurbita moschata	Sown November, harvested October. Local name Ndodo.	NA	Cultivated material	Africa	1e-05	1e-05	1e-05	1e-05	0.99995	1e-05	4	85
PI_482545	No	Zimbabwe	TGR 1442	Cucurbita moschata	NA	NA	Cultivated material	Africa	1e-05	1e-05	0.077754	1e-05	0.922206	1e-05	4	127
PI_482506	No	Zimbabwe	TGR 596	Cucurbita moschata	Sown October, harvested April.	NA	Cultivated material	Africa	1e-05	1e-05	1e-05	1e-05	0.99995	1e-05	4	95
PI_482573	No	Zimbabwe	TGR 1645C	Cucurbita moschata	Sown November, harvested April.	NA	Cultivated material	Africa	1e-05	1e-05	1e-05	1e-05	0.99995	1e-05	4	119
PI_482516	No	Zimbabwe	TGR 747	Cucurbita moschata	NA	NA	Cultivated material	Africa	1e-05	1e-05	1e-05	1e-05	0.99995	1e-05	4	97
PI_482521	No	Zimbabwe	TGR 865	Cucurbita moschata	Sown November, harvested April.	NA	Cultivated material	Africa	1e-05	1e-05	1e-05	1e-05	0.99995	1e-05	4	99
PI_482524	No	Zimbabwe	TGR 1060	Cucurbita moschata	Fruits large, round, green and yellow striped.	NA	Cultivated material	Africa	1e-05	1e-05	1e-05	1e-05	0.99995	1e-05	4	98
PI_482525	No	Zimbabwe	TGR 1081	Cucurbita moschata	Fruits flat and fluted. Flesh white. Local name Nboko.	NA	Cultivated material	Africa	1e-05	1e-05	1e-05	1e-05	0.99995	1e-05	4	102
PI_482527	No	Zimbabwe	TGR 1143	Cucurbita moschata	Fruits large, oval creamy yellow skinned types and green striped types.	NA	Cultivated material	Africa	1e-05	1e-05	1e-05	1e-05	0.99995	1e-05	4	100
PI_482528	No	Zimbabwe	TGR 1155	Cucurbita moschata	Fruits green and cream.	NA	Cultivated material	Africa	1e-05	1e-05	1e-05	1e-05	0.99995	1e-05	4	101
PI_482534	No	Zimbabwe	TGR 1268	Cucurbita moschata	Sown November, harvested April.	NA	Cultivated material	Africa	1e-05	1.2e-05	0.063951	1e-05	0.936007	1e-05	4	129
PI_482564	No	Zimbabwe	TGR 1563	Cucurbita moschata	Sown November, harvested April. Fruits mixture of spotted green speckled and white brownish types.	NA	Cultivated material	Africa	1e-05	1e-05	1e-05	1e-05	0.99995	1e-05	4	111
PI_482546	No	Zimbabwe	TGR 1445	Cucurbita moschata	NA	NA	Cultivated material	Africa	1e-05	1e-05	1e-05	1e-05	0.99995	1e-05	4	104
PI_524428	No	Zimbabwe	TGR 1243a	Cucurbita moschata	Originally a mixed collection with TGR 1243 (PI 482478)	NA	Cultivated material	Africa	1e-05	1e-05	1e-05	1e-05	0.99995	1e-05	4	91
PI_482569	No	Zimbabwe	TGR 1631	Cucurbita moschata	Sown November, harvested April. Local name Nzunzu.	NA	Cultivated material	Africa	1e-05	1e-05	1e-05	1e-05	0.99995	1e-05	4	113
PI_482570	No	Zimbabwe	TGR 1634	Cucurbita moschata	Sown November, harvested April.	NA	Cultivated material	Africa	1e-05	1e-05	1e-05	1e-05	0.99995	1e-05	4	118
PI_482578	No	Zimbabwe	TGR 1684	Cucurbita moschata	Sown November, harvested April.	NA	Cultivated material	Africa	1e-05	1e-05	1e-05	1e-05	0.99995	1e-05	4	114
PI_482575	No	Zimbabwe	TGR 1654	Cucurbita moschata	Sown November, harvested April.	NA	Cultivated material	Africa	1e-05	1e-05	1e-05	1e-05	0.99995	1e-05	4	117
PI_482576	No	Zimbabwe	TGR 1662	Cucurbita moschata	Sown November, harvested April.	NA	Cultivated material	Africa	1e-05	1e-05	1e-05	1e-05	0.99995	1e-05	4	115
PI_482577	No	Zimbabwe	TGR 1669	Cucurbita moschata	Sown November, harvested April.	NA	Cultivated material	Africa	1e-05	1e-05	1e-05	1e-05	0.99995	1e-05	4	116
PI_482560	No	Zimbabwe	TGR 1531	Cucurbita moschata	Sown November, harvested April.	NA	Cultivated material	Africa	1e-05	1e-05	1e-05	1e-05	0.99995	1e-05	4	112
PI_482583	No	Zimbabwe	TGR 1885	Cucurbita moschata	Sown November, harvested April. Fruits white.	NA	Cultivated material	Africa	1e-05	1e-05	1e-05	1e-05	0.99995	1e-05	4	86
PI_482585	No	Zimbabwe	TGR 1926	Cucurbita moschata	Sown November, harvested April. Fruits oval, angular to penduncle shaped, green to yellow.	NA	Cultivated material	Africa	0.003572	1e-05	1e-05	1e-05	0.996388	1e-05	4	83
PI_482556	No	Zimbabwe	TGR 1507	Cucurbita moschata	Sown November, harvested April.	NA	Cultivated material	Africa	1e-05	1e-05	1e-05	1e-05	0.99995	1e-05	4	106
PI_482501	No	Zimbabwe	TGR 490	Cucurbita moschata	Sown September, harvested April.	NA	Cultivated material	Africa	1e-05	1e-05	0.038351	1e-05	0.961609	1e-05	4	123
PI_482552	No	Zimbabwe	TGR 1474	Cucurbita moschata	NA	NA	Cultivated material	Africa	1e-05	1e-05	1e-05	1e-05	0.99995	1e-05	4	107
PI_482538	No	Zimbabwe	TGR 1340	Cucurbita moschata	Local name Nzururu.	NA	Cultivated material	Africa	1e-05	1e-05	1e-05	1e-05	0.99995	1e-05	4	103
PI_482500	No	Zimbabwe	TGR 358	Cucurbita moschata	NA	NA	Cultivated material	Africa	1e-05	1e-05	1e-05	1e-05	0.99995	1e-05	4	94
PI_482549	No	Zimbabwe	TGR 1456	Cucurbita moschata	Mixed types.	NA	Cultivated material	Africa	1e-05	1e-05	0.02755	1e-05	0.97241	1e-05	4	126
PI_482547	No	Zimbabwe	TGR 1446	Cucurbita moschata	Fruits green and cream colored.	NA	Cultivated material	Africa	0.005894	1e-05	0.025884	1e-05	0.968191	1e-05	4	125
PI_482548	No	Zimbabwe	TGR 1453	Cucurbita moschata	NA	NA	Cultivated material	Africa	1e-05	1e-05	1e-05	1e-05	0.99995	1e-05	4	105
PI_482542	No	Zimbabwe	TGR 1422	Cucurbita moschata	NA	NA	Cultivated material	Africa	1e-05	1e-05	0.00948	1e-05	0.99048	1e-05	4	121
PI_482553	No	Zimbabwe	TGR 1475	Cucurbita moschata	NA	NA	Cultivated material	Africa	1e-05	1e-05	1e-05	1e-05	0.99995	1e-05	4	108
PI_482554	No	Zimbabwe	TGR 1488	Cucurbita moschata	Sown November, harvested April.	NA	Cultivated material	Africa	0.037237	1e-05	1e-05	1e-05	0.962723	1e-05	4	130
PI_490354	No	Burkina Faso	Yobir	Cucurbita moschata	Fruit pulp and embryo's cooked for sauce. Flowers 4cm long, 2cm in diameter, yellow. Fruit roundish, 12cm long, 11cm in diameter.	NA	Cultivated material	Africa	0.454593	1e-05	1e-05	1e-05	0.067676	0.477701	1	276
PI_524427	No	Zambia	ZFA 3633a	Cucurbita moschata	Originally a mixed collection with ZFA 3633 (PI 494842)	NA	Landrace	Africa	1e-05	1e-05	0.194708	1e-05	0.805252	1e-05	4	82
PI_500559	No	Zambia	NA	Cucurbita moschata	NA	NA	Wild material	Africa	1e-05	1e-05	0.006078	1e-05	0.993882	1e-05	4	120
PI_500562	No	Zambia	NA	Cucurbita moschata	NA	NA	Cultivated material	Africa	1e-05	1e-05	1e-05	1e-05	0.99995	1e-05	4	93
PI_500558	No	Zambia	NA	Cucurbita moschata	NA	NA	Cultivated material	Africa	1e-05	1e-05	0.035992	1e-05	0.963968	1e-05	4	124
PI_500488	No	Zambia	ZM-1889	Cucurbita moschata	NA	NA	Cultivated material	Africa	0.056868	1e-05	0.017785	1e-05	0.925317	1e-05	4	131
PI_494832	No	Zambia	ZFA 3266	Cucurbita moschata	Fruit large. Received as Cucurbita moschata.	NA	Landrace	Africa	0.286963	0.002578	1e-05	0.000732	0.681631	0.028085	4	81
PI_500555	No	Zambia	NA	Cucurbita moschata	NA	NA	Cultivated material	Africa	1e-05	1e-05	1e-05	1e-05	0.99995	1e-05	4	92
PI_500557	No	Zambia	NA	Cucurbita moschata	NA	NA	Cultivated material	Africa	0.023755	1e-05	0.04027	1e-05	0.935945	1e-05	4	132
PI_500536	No	Zambia	NA	Cucurbita moschata	NA	NA	Cultivated material	Africa	0.177295	0.110328	0.111293	0.079478	0.500709	0.020897	4	80
PI_498429	No	Colombia	NA	Cucurbita moschata	Collected by H. Sardi and J. Jaramillo. Local name Colombian black squash.	NA	Cultivated material	South/Latin America	0.361122	0.373408	1e-05	1e-05	1e-05	0.265439	6	27
PI_560946	No	Bolivia	joco.	Cucurbita moschata	Fruit elongated, pear shaped, 40cm long, 13cm max. diam., very slightly ribbed. Color dark green with flesh-colored spots and speckles. Flesh stringy, orange. Seeds off-white with tan border. Grown locally, purchased in store.	NA	Cultivated material	South/Latin America	0.667555	0.024877	1e-05	1e-05	0.140387	0.167161	6	15
PI_560952	No	Bolivia	joco.	Cucurbita moschata	Elongate squash, 50cm long, 8cm diam., slightly twisted, slightly ribbed. Color light green variegated with yellow, turning mostly yellow when ripe. Peduncle woody, ribbed, flared at insertion. Flesh thick, firm, light orange. Seeds light brown, 1cm long. Ovary only in distal half of fruit, proximal half solid. Grown locally.	NA	Cultivated material	South/Latin America	0.765806	0.030972	1e-05	1e-05	0.081272	0.12193	6	16
PI_634692	No	Yemen	Grif 1573	Cucurbita moschata	NA	NA	NA	Arab States	1e-05	1e-05	0.860694	1e-05	0.139266	1e-05	5	58
PI_634706	No	Sri Lanka	CP-00-01	Cucurbita moschata	Large fruited.	NA	Uncertain improvement status	Asia	1e-05	1e-05	0.99995	1e-05	1e-05	1e-05	5	72
PI_209116	No	Puerto Rico	NA	Cucurbita moschata	NA	NA	NA	NA	0.523342	0.060279	0.405951	1e-05	1e-05	0.010407	5	47
PI_209117	No	Puerto Rico	NA	Cucurbita moschata	NA	NA	NA	NA	0.168697	0.182543	0.385633	0.124397	0.076559	0.062171	6	36
PI_448806	No	NA	NA	wrong PI	NA	NA	NA	NA	1e-05	0.465724	0.007655	0.06082	1e-05	0.465781	1	285
PI_357918	No	Serbia	NA	Cucurbita moschata	NA	NA	NA	NA	0.512047	1e-05	0.487913	1e-05	1e-05	1e-05	5	46
PI_458650	No	Suriname	PRT 1	Cucurbita moschata	Fruit ovate to round, 15.2-30.5cm diameter, green with greenish-yellow blotches. Flesh 2.5-5.1cm thick, orange.	NA	Cultivated material	NA	0.600573	0.318289	1e-05	1e-05	0.022099	0.059019	6	4
PI_536494	No	Maldives	KLM-1689	Cucurbita moschata	NA	NA	NA	NA	1.2e-05	1e-05	0.448061	0.043769	0.010113	0.498035	1	275
PI_550689	No	United States	CANADA CROOKNECK (87-1)	Cucurbita moschata	Variety which spontaneoulsy gave rise to the first butternut-type squash. Only recorded instance of spontaneous change from crookneck to butternut fruit	Neck	Cultivar	North America	NA	NA	NA	NA	NA	NA	NA	NA
PI_550690	No	United States	DERIVED CROOKNECK (87-2)	Cucurbita moschata	Crookneck line derived from the self progeny of a rouge crookneck plant in a population of the unstable cultivar Butternut	Neck	Breeding material	North America	NA	NA	NA	NA	NA	NA	NA	NA
Black_Futsu	No	NA	NA	Cucurbita moschata	NA	Japonica	Cultivar	NA	NA	NA	NA	NA	NA	NA	NA	NA
Burpees_Butterbush	No	NA	NA	Cucurbita moschata	NA	Neck	Cultivar	NA	NA	NA	NA	NA	NA	NA	NA	NA
Chirimen	No	NA	NA	Cucurbita moschata	NA	Japonica	Cultivar	NA	NA	NA	NA	NA	NA	NA	NA	NA
PI_550694	No	United States	REGULAR BUTTERNUT (87-5)	Cucurbita moschata	A direct descendent from the original cultivar Butternut. Unstable for butternut type fruit. Must be rogued at flowering by examination of ovary shape	Neck	Cultivar	North America	NA	NA	NA	NA	NA	NA	NA	NA
Greek_Sweet_Red	No	NA	NA	Cucurbita moschata	NA	Neck	Cultivar	NA	NA	NA	NA	NA	NA	NA	NA	NA
PI_634982	No	United States	Waltham Butternut	Cucurbita moschata	NA	Neck	Cultivar	North America	NA	NA	NA	NA	NA	NA	NA	NA
PI_604505	No	United States	KENTUCKY FIELD	Cucurbita moschata	Info. from Asgrow cat. No. 19 (1957) -- (NSSL application shows notation of "obsolete"). Length in inches - 10-18. Dia. in inches - 13. 120 days. Widely used for canning and suitable for stock feed. Fruits variable in shape, but usually deeper than they are wide, tapered at ends, 10-15 lb. Rind smooth, dull orange-yellow, distinctly sutured, thin, hard. Flesh thick, coarse, deep yellow, sweet.	Cheese	Cultivar	North America	NA	NA	NA	NA	NA	NA	NA	NA
Violina_Rigosa	No	NA	NA	Cucurbita moschata	NA	Neck	Cultivar	NA	NA	NA	NA	NA	NA	NA	NA	NA
PI_550693	No	United States	PONCA CR (87-6)	Cucurbita moschata	Part of isogenic set derived from hand pollinator of 2 branches of a rare dimorphic plant in a field of Ponca Butternut. Produces mostly Crookneck type fruit. Only crookneck line that produces dimorphic and Crookneck F1 progeny when used to pollinate a stable butternut cultivar	Neck	Breeding material	North America	NA	NA	NA	NA	NA	NA	NA	NA
PI_653064	No	Africa	Nigerian Local	Cucurbita moschata	NA	NA	Cultivar	Africa	NA	NA	NA	NA	NA	NA	NA	NA
PI_550692	No	United States	PONCA BN (87-4)	Cucurbita moschata	Part of isogenic set derived from hand pollinator of 2 branches of a rare dimorphic plant in a field of Ponca Butternut. Relatively stable producer of butternut type fruit	Neck	Breeding material	North America	NA	NA	NA	NA	NA	NA	NA	NA
Thai_Rai_Kaw_Tok	No	NA	NA	Cucurbita moschata	NA	Japonica	Cultivar	NA	NA	NA	NA	NA	NA	NA	NA	NA
PI_634704	No	United States	HERCULES	Cucurbita moschata	Large butternut, thick neck, sometimes dumb-bell shape. Tan skin, bright orange flesh; rather late.	Neck	Cultivar	North America	NA	NA	NA	NA	NA	NA	NA	NA
Fairytale	No	NA	NA	Cucurbita moschata	NA	Cheese	Cultivar	NA	NA	NA	NA	NA	NA	NA	NA	NA
PI_604506	No	United States	Large Cheese	Cucurbita moschata	Info. from Corneli cat. No. 14 -- 110 days. Uses - Home, market and canning. Derives name from the cheese box shape of fruits. Fruit 7" deep, 15 inches in dia., sometimes larger. Weigh 12 to 15 lbs. Very flat shape, slightly grooved. Shell hard. Skin deep yellow. Flesh fairly thick, of fine quality and flavor. Orange-yellow.	Cheese	Cultivar	North America	NA	NA	NA	NA	NA	NA	NA	NA
Tromboncino	No	NA	NA	Cucurbita moschata	NA	Neck	Cultivar	NA	NA	NA	NA	NA	NA	NA	NA	NA
Teot_Bat_Put	No	NA	NA	Cucurbita moschata	NA	Japonica	Cultivar	NA	NA	NA	NA	NA	NA	NA	NA	NA
Meot_Jaeng_I_Ae	No	NA	NA	Cucurbita moschata	NA	NA	Cultivar	NA	NA	NA	NA	NA	NA	NA	NA	NA
Thai_Kang_Kob	No	NA	NA	Cucurbita moschata	NA	Japonica	Cultivar	NA	NA	NA	NA	NA	NA	NA	NA	NA
Seminole	No	NA	NA	Cucurbita moschata	NA	Neck	Cultivar	NA	NA	NA	NA	NA	NA	NA	NA	NA
PI_600843	No	United States	BUNUTKIN	Cucurbita moschata	NA	Neck	Cultivar	North America	NA	NA	NA	NA	NA	NA	NA	NA
Shishigatani	No	NA	NA	Cucurbita moschata	NA	NA	Cultivar	NA	NA	NA	NA	NA	NA	NA	NA	NA
PI_595436	No	Puerto Rico	FORTUNA	Cucurbita moschata	NA	Calabaza	Cultivar	NA	NA	NA	NA	NA	NA	NA	NA	NA
PI_483345	No	South Korea	Aehobag F1	Cucurbita moschata	Maturity early.	NA	Cultivar	Asia	NA	NA	NA	NA	NA	NA	NA	NA
PI_483346	No	South Korea	Sachul F1 (Oriental Wonder)	Cucurbita moschata	Maturity early.	NA	Cultivar	Asia	NA	NA	NA	NA	NA	NA	NA	NA
Kogiku	No	NA	NA	Cucurbita moschata	NA	Japonica	Cultivar	NA	NA	NA	NA	NA	NA	NA	NA	NA
La_Estrella	No	NA	NA	Cucurbita moschata	NA	Calabaza	Cultivar	NA	NA	NA	NA	NA	NA	NA	NA	NA
Kikuza	No	NA	NA	Cucurbita moschata	NA	Japonica	Cultivar	NA	NA	NA	NA	NA	NA	NA	NA	NA

## Sheet: maxima_meta
accession_id	removed	country	accession_name	taxonomy	improvement_status	cultivar_class	narrative	region	1	2	3	4	5	6	grp	pos
G_21629	No	Afghanistan	G 21629	Cucurbita maxima	NA	NA	NA	Asia	0.761534	0.187785	1e-05	0.01708	0.033582	1e-05	2	371
G_21630	No	Afghanistan	G 21630	Cucurbita maxima	NA	NA	NA	Asia	0.668037	0.258874	1e-05	1e-05	0.073059	1e-05	2	376
PI_135396	No	Afghanistan	No. 5057	Cucurbita maxima	NA	NA	Fruit somewhat flattened, 10 by 9 inches; rind pea green, heavily indented ribs; flesh orange, 2 to 3 inches thick, falirly good.	Asia	0.427353	0.221403	0.008512	0.278917	0.063805	1e-05	5	120
PI_135353	No	Afghanistan	No. 4921	Cucurbita maxima	NA	NA	Fruit subglobose, slightly flattened, 18 inches in length; weight about 50 pounds; rind grayish green; flesh yellow, 3 inches thick, not very sweet.	Asia	0.239675	0.338551	0.057813	0.363941	1e-05	1e-05	5	117
PI_135355	No	Afghanistan	No. 5016	Cucurbita maxima	NA	NA	Fruit 24 by 10 inches; rind smooth; unribbed, handsome salmon pink with green belly; flesh 2.5 inches thick, of good texture, and sweet.	Asia	0.514629	0.485331	1e-05	1e-05	1e-05	1e-05	5	178
PI_135351	No	Afghanistan	No. 4900	Cucurbita maxima	NA	NA	Fruits slightly flattened, 14 inches in length; rind salmon pink; flesh yellow, 2 inches thick, fair quality.	Asia	0.588858	0.387036	0.024076	1e-05	1e-05	1e-05	5	173
PI_135352	No	Afghanistan	No. 4911	Cucurbita maxima	NA	NA	Fruits slightly flattened, 15 inches in length; rind obscurely ribbed, gray green; flesh yellow, 2.5 inches thick, fair quality.	Asia	0.611084	0.388876	1e-05	1e-05	1e-05	1e-05	5	167
PI_135387	No	Afghanistan	No. 4930	Cucurbita maxima	NA	NA	Fruit globose, 10 inches in diameter; rind white, faintly ribbed; flesh pale orange, 2 inches thick, incipid.	Asia	0.501516	0.189773	0.119653	0.020469	0.168578	1e-05	2	378
PI_223438	No	Afghanistan	Kadoo	Cucurbita maxima	NA	NA	NA	Asia	0.273593	0.704247	1e-05	1e-05	0.02213	1e-05	5	186
PI_135356	No	Afghanistan	No. 5037	Cucurbita maxima	NA	NA	Fruit flattened, 11 by 7 inches; rind orange red with obscure rib lines of cream, smooth; flesh orange, not very sweet, smooth; flesh yellow, 3 inches thich, insipid.	Asia	0.412472	0.587488	1e-05	1e-05	1e-05	1e-05	5	190
PI_135365	No	Afghanistan	No. 4902	Cucurbita maxima	NA	NA	Fruit somewhat flattened, 8 inches in length; rind orange red; flesh bright orange, 1.5 inches thick, of fair quality.	Asia	0.585159	0.370928	0.043884	1e-05	1e-05	1e-05	5	172
PI_135370	No	Afghanistan	No. 4929	Cucurbita maxima	NA	NA	Fruit 24 by 10 inches; rind battleship gray, shiny, faintly ribbed; flesh bright orange, of good quality, but not very sweet.	Asia	0.525705	0.365423	1e-05	0.06592	0.042931	1e-05	5	166
PI_222188	No	Afghanistan	No. 737	Cucurbita maxima	NA	NA	Fruit round, orange; flesh white.	Asia	0.570052	0.126768	0.055999	0.231862	0.01531	1e-05	2	384
PI_135382	No	Afghanistan	No. 4725	Cucurbita maxima	NA	NA	Fruit flattened, 16 by14 inches; rind orange pink, with broken blotches of green and white; flesh yellow, 2.5 inches thick, insipid.	Asia	0.456424	0.502103	1e-05	1e-05	1e-05	0.041443	5	177
PI_135368	No	Afghanistan	No. 4909	Cucurbita maxima	NA	NA	Fruit somewhat flattened, 8 inches in length; rind black green; flesh orange, 1.5 inches thick, rather insipid.	Asia	0.576033	0.423927	1e-05	1e-05	1e-05	1e-05	5	168
PI_135373	No	Afghanistan	No. 5018	Cucurbita maxima	NA	NA	Fruit 14 by 9 inches; rind black green with blotches of Chinese red; flesh orange yellow, 2 to 2.25 inches thick, fair quality.	Asia	0.381779	0.408577	0.094258	1e-05	0.115366	1e-05	5	176
PI_135363	No	Afghanistan	Mekaekidu	Cucurbita maxima	NA	NA	Fruit round enlongate, 12 inches in length; rind ash gray, marbled with pink; flesh yellowish orange, 2 inches thick, insipid.	Asia	0.185719	0.177105	1e-05	0.548619	1e-05	0.088537	1	430
PI_92835	No	United States	'Nan Kwa'	Cucurbita maxima	NA	NA	South squash	North America	0.551129	0.171628	0.074427	0.110293	0.092513	1e-05	2	386
G_32612	No	United States	Crown Squash	Cucurbita maxima	Cultivated	NA	A hardy squash with wonderful flavor; germinates well and needs little care besides appropriate watering.	North America	1e-05	0.133048	0.033998	0.832924	1e-05	1e-05	1	401
PI_656589	No	United States	Quality	Cucurbita maxima	NA	NA	Info. from Harris 1959 cat. Splendid, high qlty squash. 103 days. Extra thick meat and fine flav. Attract. hrt shape means deeper flesh at the shldrs and the seed cavity is small. Dark olive grn w/a thin, hard rind. It has deep orange-clrd flesh very dry, sweet and fine grained. Med. sized frt (5-10 lbs.) Running vines set hvy crops. Good keeper. Quality is excell- ent for the home garden and for…	North America	1e-05	1e-05	0.031158	0.849804	0.119008	1e-05	1	407
PI_267750	No	United States	'Candy Roadster'	Cucurbita maxima	NA	NA	Grown for over 100 years in North Carolina mountains. Plants vigorous, early maturing; leaf large; fruit slate gray, oblong, smooth, 20 by 9 inches. Susceptible to powdery mildew.	North America	0.079083	0.271059	0.024655	0.579617	0.020527	0.025058	1	431
PI_220861	No	United States	Hung	Cucurbita maxima	NA	NA	Fruits large, 14 inches by 15 inches, yellow.	North America	0.170955	1e-05	0.052482	0.638639	1e-05	0.137904	1	456
PI_518679	No	United States	Turban Squash	Cucurbita maxima	Cultivated	NA	Local type.	North America	1e-05	0.931364	1e-05	0.068596	1e-05	1e-05	5	163
PI_245142	No	United States	No Known Plant ID	Cucurbita maxima	NA	NA	Selection made from PI 176536. Fruits oblate, 8 by 10 inches; ribs 1 inch wide; flesh light yellow.	North America	0.136264	0.411947	0.002129	0.281621	0.006113	0.161926	5	113
PI_349354	No	United States	No Known Plant ID	Cucurbita maxima	NA	NA	NA	North America	1e-05	0.166435	0.113892	0.683969	1e-05	0.035684	1	433
PI_518678	No	United States	Banana Squash	Cucurbita maxima	Cultivated	NA	Local type. Peduncle tan, corky. Fruit pink, smooth and unmarked with a light green zone at flower end. Seeds deep tan.	North America	1e-05	0.126858	1e-05	0.858636	0.014476	1e-05	1	403
PI_302417	No	United States	Banquet Squash	Cucurbita maxima	Cultivated	NA	Oblate shaped friut; 6 - 10 inches by 4 - 5.5 inches with grooves, flesh orange 1 to 1.5 inches thick.	North America	0.148582	1e-05	0.00312	0.182905	0.646541	0.018843	6	12
G_23725	No	Argentina	Alayo	Cucurbita maxima	NA	NA	NA	South/Latin America	0.069572	1e-05	0.930388	1e-05	1e-05	1e-05	4	195
PI_458661	No	Argentina	TW 1080	Cucurbita maxima	NA	NA	Probably a mixture of local types. Local name Zapallo.	South/Latin America	0.101115	0.096392	0.240054	0.507919	0.05451	1e-05	1	455
PI_458678	No	Argentina	TWW-48	Cucurbita maxima	NA	NA	Donated by L.O. Melis. Bush type. Seeds white, margins white. Local name Tanca.	South/Latin America	1e-05	1e-05	0.486778	0.319587	0.094095	0.099519	4	218
PI_458662	No	Argentina	TW 1080	Cucurbita maxima	NA	NA	Fruit medium-sized with deep vein tracts, rough surface. Probably from Misiones. Local name Zapallo.	South/Latin America	1e-05	1e-05	0.190066	0.711949	0.082374	0.015591	1	439
PI_458694	No	Argentina	TWW-64	Cucurbita maxima	NA	NA	Donated by L.O. Melis. Bush type. Seeds medium-sized, white, more or less marginless. Local name Taplop.	South/Latin America	1e-05	0.053312	0.60879	0.337868	1e-05	1e-05	4	219
G_23726	No	Argentina	Alayo	Cucurbita maxima	NA	NA	NA	South/Latin America	1e-05	0.044366	0.955594	1e-05	1e-05	1e-05	4	213
G_23731	No	Argentina	Maluen	Cucurbita maxima	NA	NA	NA	South/Latin America	1e-05	1e-05	0.99995	1e-05	1e-05	1e-05	4	212
PI_458693	No	Argentina	TWW-63	Cucurbita maxima	NA	NA	Donated by L.O. Melis. Bush type. Seeds medium-sized, roundish, white, margins light. Local name Vinaca.	South/Latin America	1e-05	1e-05	0.99995	1e-05	1e-05	1e-05	4	205
G_23728	No	Argentina	Chiuque	Cucurbita maxima	NA	NA	NA	South/Latin America	0.217901	0.011996	0.494493	0.008538	1e-05	0.267063	4	215
PI_458696	No	Argentina	TWW-66	Cucurbita maxima	NA	NA	Donated by L.O. Melis. Seeds large, white, margins light. Local name Carla.	South/Latin America	1e-05	0.05445	0.94551	1e-05	1e-05	1e-05	4	214
PI_458663	No	Argentina	TW 1080	Cucurbita maxima	NA	NA	Fruit medium-sized, Probably elongate, with a rough surface. Probably from Misiones. Local name Zapallo.	South/Latin America	0.189431	0.016501	0.174471	0.521324	0.098264	1e-05	1	450
PI_458688	No	Argentina	TWW-58	Cucurbita maxima	NA	NA	Donated by L.O. Melis. Bush type. Seeds small, white, margins light. Local name Maguilta.	South/Latin America	1e-05	1e-05	0.99995	1e-05	1e-05	1e-05	4	206
PI_458689	No	Argentina	TWW-59	Cucurbita maxima	NA	NA	Donated by L.O. Melis. Seeds small, white, margins light. Local name Pallamay.	South/Latin America	1e-05	1e-05	0.999947	1.3e-05	1e-05	1e-05	4	199
PI_458699	No	Argentina	TWW-69	Cucurbita maxima	NA	NA	Seeds white, medium-sized, margins present. Local name Campana-Labanda-70.	South/Latin America	1e-05	1e-05	0.178804	0.821156	1e-05	1e-05	1	398
PI_458676	No	Argentina	TWW-46	Cucurbita maxima	NA	NA	Donated by L.O. Melis. Bush type. Seeds white, marginless. Local name Supupa.	South/Latin America	1e-05	1e-05	0.99995	1e-05	1e-05	1e-05	4	201
PI_458677	No	Argentina	TWW-47	Cucurbita maxima	NA	NA	Donated by L.O. Melis. Bush type. Seeds white, margins present. Local name Sipigua.	South/Latin America	1e-05	1e-05	0.923613	0.076347	1e-05	1e-05	4	196
PI_458709	No	Argentina	TWW-86	Cucurbita maxima	NA	NA	Donated by J. Camara-Hernandez. Seeds medium to large, white, margins darker.	South/Latin America	1e-05	0.026729	0.225911	0.590242	0.004311	0.152797	1	448
PI_458710	No	Argentina	TWW-87	Cucurbita maxima	NA	NA	Donated by J. Camara-Hernandez. Seeds large, white, margins slightly darker.	South/Latin America	0.025629	1e-05	0.184838	0.655606	0.053488	0.080428	1	445
PI_458714	No	Argentina	TWW-92	Cucurbita maxima	NA	NA	Donated by J. Camara-Hernandez. Seeds medium-sized, pure white, margins same color.	South/Latin America	0.037856	1e-05	0.114366	0.631925	0.215833	1e-05	1	427
PI_458682	No	Argentina	TWW-52	Cucurbita maxima	NA	NA	Donated by L.O. Melis. Bush type. Seeds white, margins white. Local name Malopara.	South/Latin America	1e-05	1e-05	0.99995	1e-05	1e-05	1e-05	4	200
PI_458698	No	Argentina	TWW-68	Cucurbita maxima	NA	NA	Seeds white, medium-sized, margins present. Local name Zapallito del Tronco (Cochi magnif.).	South/Latin America	1e-05	1e-05	0.461768	0.432386	0.028787	0.077039	4	223
PI_458665	No	Argentina	TW 1080	Cucurbita maxima	NA	NA	Fruit surface rough. Probably from Misiones. Local name Zapallo.	South/Latin America	1e-05	1e-05	0.153421	0.765079	0.08147	1e-05	1	441
PI_458666	No	Argentina	TW 1080	Cucurbita maxima	NA	NA	Fruit surface rough. Flesh yellow, thick. Seeds large, yellow. Probably from Misiones. Local name Zapallo.	South/Latin America	0.103048	1e-05	0.249825	0.53704	0.067287	0.04279	1	451
PI_265557	No	Argentina	No Known Plant ID	Cucurbita maxima	NA	NA	NA	South/Latin America	0.058579	0.104372	0.20027	0.315501	0.099727	0.221551	5	109
PI_458701	No	Argentina	TWW-71	Cucurbita maxima	NA	NA	Seeds white, small, margins broad. Local name Zipinki Campana.	South/Latin America	0.077685	0.062185	0.20145	0.65866	1e-05	1e-05	1	443
PI_458702	No	Argentina	TWW-72	Cucurbita maxima	NA	NA	Seeds Banana type, large, tan, margins broad, light. Local name Plomo ruso (Plaunorskja).	South/Latin America	0.390369	0.089544	0.018527	0.158262	1e-05	0.343288	5	148
G_23732	No	Argentina	Maluen	Cucurbita maxima	NA	NA	NA	South/Latin America	1e-05	1e-05	0.99995	1e-05	1e-05	1e-05	4	211
G_23733	No	Argentina	Pichagua	Cucurbita maxima	NA	NA	NA	South/Latin America	1e-05	0.073955	0.123377	0.163021	0.173971	0.465666	3	278
PI_458692	No	Argentina	TWW-62	Cucurbita maxima	NA	NA	Donated by L.O. Melis. Bush type. Seeds medium-sized, white, margins light. Local name Vistalba.	South/Latin America	1e-05	1e-05	0.99995	1e-05	1e-05	1e-05	4	204
PI_458691	No	Argentina	TWW-61	Cucurbita maxima	NA	NA	Donated by L.O. Melis. Winter bush type. Seeds large, white, margins white. Local name Marino de Mendoza.	South/Latin America	0.424094	0.108246	0.084778	0.258061	1e-05	0.124812	2	332
G_23734	No	Argentina	Pichagua	Cucurbita maxima	NA	NA	NA	South/Latin America	0.085445	1e-05	0.564772	0.210436	1e-05	0.139328	4	217
PI_458679	No	Argentina	No Known Plant ID	Cucurbita maxima	NA	NA	Donated by L.O. Melis. Seeds white, margins white. Local name Relanta.	South/Latin America	1e-05	0.118634	0.247763	0.573995	1e-05	0.059587	1	447
PI_458695	No	Argentina	TWW-65	Cucurbita maxima	NA	NA	Donated by L.O. Melis. Seeds medium-sized, white, with slight sculpturing, margins light. Local name Sayanca.	South/Latin America	1e-05	1.9e-05	0.999941	1e-05	1e-05	1e-05	4	197
PI_458697	No	Argentina	TWW-67	Cucurbita maxima	NA	NA	Donated by L.O. Melis. Bush type. Seeds medium-sized, white, margins darker. Local name Pichagua.	South/Latin America	0.001272	0.040089	0.496376	0.409786	0.013689	0.038789	4	222
PI_458664	No	Argentina	TW 1080	Cucurbita maxima	NA	NA	Fruit surface rough. Probably from Misiones. Local name Zapallo.	South/Latin America	0.02512	1e-05	0.148961	0.738575	0.083297	0.004037	1	440
PI_458669	No	Argentina	Hubbard Rojo	Cucurbita maxima	NA	NA	Warted Hubbard type, fruit skin orange. Local name Zapallo.	South/Latin America	1e-05	0.237724	0.148787	0.398034	0.215435	1e-05	1	415
PI_458687	No	Argentina	TWW-57	Cucurbita maxima	NA	NA	Donated by L.O. Melis. Bush type. Seeds white, margins light. Local name Choay.	South/Latin America	1e-05	1e-05	0.841424	0.137039	1e-05	0.021506	4	193
G_23729	No	Argentina	Malopara	Cucurbita maxima	NA	NA	NA	South/Latin America	1e-05	1.4e-05	0.999946	1e-05	1e-05	1e-05	4	198
G_23730	No	Argentina	Malopara	Cucurbita maxima	NA	NA	NA	South/Latin America	1e-05	1e-05	0.99995	1e-05	1e-05	1e-05	4	210
PI_458690	No	Argentina	TWW-60	Cucurbita maxima	NA	NA	Donated by L.O. Melis. Bush type. Seeds medium-sized, white, more or less marginless. Local name Chacoriano.	South/Latin America	1e-05	0.130163	0.400806	0.469001	1e-05	1e-05	4	220
PI_458704	No	Argentina	TWW-78	Cucurbita maxima	NA	NA	Donated by J. Camara-Hernandez. Seeds medium-sized, creamy white, margins darker.	South/Latin America	1e-05	1e-05	0.248725	0.64332	0.059595	0.048341	1	444
PI_162671	No	Argentina	Forrajero	Cucurbita maxima	NA	NA	NA	South/Latin America	0.312854	0.061194	1e-05	0.491531	1e-05	0.134401	1	413
PI_458683	No	Argentina	TWW-53	Cucurbita maxima	NA	NA	Donated by L.O. Melis. Seeds white, sculptured, marginless. Local name Vistalba.	South/Latin America	1e-05	1e-05	0.99995	1e-05	1e-05	1e-05	4	208
PI_458660	No	Argentina	TW 1080	Cucurbita maxima	NA	NA	Probably a mixture of local types. Local name Zapallo.	South/Latin America	0.084106	0.012311	0.097203	0.626732	0.179638	1e-05	1	426
PI_458708	No	Argentina	TWW-82	Cucurbita maxima	NA	NA	Donated by J. Camara-Hernandez. Seeds medium-sized, white, margins white.	South/Latin America	1e-05	0.085134	0.138327	0.699849	0.07667	1e-05	1	438
PI_458686	No	Argentina	TWW-56	Cucurbita maxima	NA	NA	Donated by L.O. Melis. Seeds white, margins almost white. Local name Chinque.	South/Latin America	1e-05	1e-05	0.99995	1e-05	1e-05	1e-05	4	207
PI_458670	No	Argentina	TW 1080	Cucurbita maxima	NA	NA	Probably imported from Misiones. Fruit yellow, rough surface, deep vein tracts, skin orange. Flesh yellow. Local name Zapallo.	South/Latin America	0.102904	0.017301	0.211086	0.524942	0.143757	1e-05	1	452
PI_458684	No	Argentina	TWW-54	Cucurbita maxima	NA	NA	Donated by L.O. Melis. Seeds small, white, almost marginless. Local name Alayo.	South/Latin America	1e-05	1e-05	0.99995	1e-05	1e-05	1e-05	4	209
G_23727	No	Argentina	Chiuque	Cucurbita maxima	NA	NA	NA	South/Latin America	0.103234	1e-05	0.896726	1e-05	1e-05	1e-05	4	194
PI_458675	No	Argentina	TWW-45	Cucurbita maxima	NA	NA	Donated by L.O. Melis. Bush type. Fruit white. Local name Naclao.	South/Latin America	1e-05	1e-05	0.99995	1e-05	1e-05	1e-05	4	202
PI_162670	No	Argentina	No. 181	Cucurbita maxima	NA	NA	NA	South/Latin America	0.468897	0.037522	0.050545	0.372548	1e-05	0.070478	2	330
PI_458672	No	Argentina	TW 1080	Cucurbita maxima	NA	NA	Probably imported from Misiones. Fruit flattish, smooth surface, orange, medium vein tracts, light color, producing stripes. Flesh lemon, thin. Seed cavity large. Local name Zapallo.	South/Latin America	1e-05	1e-05	0.097648	0.164152	0.604596	0.133584	6	99
PI_458703	No	Argentina	TWW-76	Cucurbita maxima	NA	NA	Donated by J. Camara-Hernandez. Seeds Banana type, large, golden brown, margins lighter.	South/Latin America	0.143023	0.048518	0.399554	0.302597	0.016423	0.089885	4	216
PI_458673	No	Argentina	No Known Plant ID	Cucurbita maxima	NA	NA	Donated by L.O. Melis. Bush type. Fruit solid white. Local name Tabalque.	South/Latin America	1e-05	1e-05	0.99995	1e-05	1e-05	1e-05	4	203
PI_162669	No	Argentina	No. 182	Cucurbita maxima	NA	NA	NA	South/Latin America	0.443465	1e-05	0.009847	0.482642	0.064026	1e-05	1	410
PI_458685	No	Argentina	TWW-55	Cucurbita maxima	NA	NA	Donated by L.O. Melis. Seeds large, white, margins white. Local name Anton.	South/Latin America	1e-05	1e-05	0.825507	0.174453	1e-05	1e-05	4	192
PI_458653	No	Argentina	TW 1080	Cucurbita maxima	NA	NA	Donated by E. M. Zardini.	South/Latin America	1e-05	0.182567	0.099899	0.588841	0.128673	1e-05	1	436
PI_458700	No	Argentina	TWW-70	Cucurbita maxima	NA	NA	Seeds large, dirty white, margins present. Local name Capana-Ingles.	South/Latin America	1e-05	1e-05	0.115948	0.828948	0.055074	1e-05	1	397
PI_414676	No	Argentina	Zapinski	Cucurbita maxima	NA	NA	Bush type plant. Prolific in fruiting.	South/Latin America	0.089581	1e-05	0.203173	0.653549	0.036138	0.017549	1	442
G_24402	No	Uruguay	Zapallo Rotando	Cucurbita maxima	NA	NA	NA	South/Latin America	1e-05	0.054829	0.458708	0.470405	1e-05	0.016039	4	221
PI_470933	No	Peru	No. 2	Cucurbita maxima	NA	NA	Leaves wide. Spreading habit. Fruits up to 50 kg. Local name Zapallo grande.	South/Latin America	1e-05	0.053389	1e-05	1e-05	0.033262	0.913319	3	230
PI_244702	No	Brazil	Moranga	Cucurbita maxima	NA	NA	Fruits flattened; orange.	South/Latin America	0.335855	1e-05	0.083975	0.171849	0.361967	0.046344	6	2
PI_244704	No	Brazil	Ovo de Ganzo 619 Moganga	Cucurbita maxima	NA	NA	Fruits the size of small 'Table Queen'; buff. Quality good.	South/Latin America	0.313254	1e-05	0.132349	0.096284	0.458094	1e-05	6	4
G_30649	No	Burundi	GMN 152	Cucurbita maxima	NA	NA	NA	Africa	1e-05	1e-05	1e-05	1e-05	0.99995	1e-05	6	33
G_30655	No	Burundi	GMN 279	Cucurbita maxima	NA	NA	NA	Africa	1e-05	1e-05	1e-05	1e-05	0.99995	1e-05	6	32
PI_175124	No	India	Kadu	Cucurbita maxima	NA	NA	NA	Asia	0.096314	0.006871	0.114011	0.606858	1e-05	0.175935	1	458
PI_165558	No	India	Kadu	Cucurbita maxima	NA	NA	NA	Asia	0.646267	0.00363	0.020108	0.052186	0.277799	1e-05	2	358
PI_163227	No	India	No. 8470	Cucurbita maxima	NA	NA	NA	Asia	0.267464	0.09815	0.072258	0.366562	0.064399	0.131166	5	126
PI_183314	No	India	Sakatatti	Cucurbita maxima	NA	NA	NA	Asia	0.236691	0.176481	1e-05	0.001808	0.37751	0.207499	6	18
PI_175125	No	India	Kadu	Cucurbita maxima	NA	NA	Fruit elongate, 25 by 10 inches, ashy, unribbed; not sweet but tasty; flesh 2 1/2 inches thick and orange-colored.	Asia	1e-05	1e-05	0.16021	0.833171	1e-05	0.006589	1	399
PI_175126	No	India	Kadu	Cucurbita maxima	NA	NA	Fruit subvoid, 15 inches in diameter, ashy, unribbed.	Asia	1e-05	0.079058	0.175387	0.588935	0.059348	0.097262	1	449
PI_121912	No	India	No. 1629	Cucurbita maxima	NA	NA	NA	Asia	0.08737	0.025916	1e-05	0.886685	1e-05	1e-05	1	391
PI_174823	No	India	Kadu	Cucurbita maxima	NA	NA	Fruit subglobose, 15 by 12 inches, heavily ribbed, grey, squash-type. Not sweet but tasty.	Asia	0.061403	0.162924	0.066114	0.302832	0.240213	0.166514	5	105
PI_121915	No	India	No Known Plant ID	Cucurbita maxima	NA	NA	NA	Asia	0.23124	0.017376	1e-05	0.751354	1e-05	1e-05	1	388
PI_121913	No	India	Kadu	Cucurbita maxima	NA	NA	NA	Asia	0.021011	0.036994	1e-05	0.870807	0.071168	1e-05	1	406
PI_166046	No	India	Kadu	Cucurbita maxima	NA	NA	NA	Asia	0.344229	0.062912	1e-05	0.571312	1e-05	0.021527	1	412
PI_121910	No	India	No. 1680	Cucurbita maxima	NA	NA	NA	Asia	0.459408	0.165955	1e-05	0.291817	1e-05	0.082801	2	333
PI_141638	No	Iran	Kaduetambal	Cucurbita maxima	NA	NA	NA	Asia	0.745243	0.254714	1e-05	1e-05	1.3e-05	1e-05	2	373
PI_137889	No	Iran	Kadu	Cucurbita maxima	NA	NA	PI book claims this acc. is C.Pepo.	Asia	0.595441	0.168192	0.122475	0.025093	0.070996	0.017804	2	379
PI_137871	No	Iran	Kadu	Cucurbita maxima	NA	NA	NA	Asia	0.616546	0.139419	1e-05	0.113815	1e-05	0.1302	2	382
PI_143281	No	Iran	No. 7644	Cucurbita maxima	NA	NA	Fruit globose, 12 inches long, pale salmon; flesh orange, 1.5 to 2.5 inches thick, insipid.	Asia	0.426081	0.564188	1e-05	0.009701	1e-05	1e-05	5	191
PI_137887	No	Iran	Kadu	Cucurbita maxima	NA	NA	Fruit globose, 12 inches in diameter; rind red orange and deeply ribbed; flesh 2 inches thick, orange yellow ; good flavor but not very sweet. PI book claims this acc. is C.Pepo.	Asia	0.924027	0.063862	0.006303	1e-05	1e-05	0.005787	2	316
PI_143284	No	Iran	No. 7735	Cucurbita maxima	NA	NA	Cultivated for the seeds.	Asia	0.338169	0.082415	0.092811	0.318013	0.133872	0.03472	5	119
PI_222784	No	Iran	Kadoo	Cucurbita maxima	NA	NA	Fruit reddish-orange, up to 2 feet in diameter.	Asia	0.359566	0.603886	1e-05	1e-05	1e-05	0.036518	5	188
PI_141640	No	Iran	Kadu	Cucurbita maxima	NA	NA	NA	Asia	0.779867	0.116483	1e-05	1e-05	0.050423	0.053206	2	370
PI_211997	No	Iran	No. 5	Cucurbita maxima	NA	NA	NA	Asia	0.552195	1e-05	1e-05	0.389119	0.043292	0.015374	2	329
PI_137866	No	Iran	No. 5241	Cucurbita maxima	NA	NA	NA	Asia	0.893716	0.089347	1e-05	1e-05	1e-05	0.016906	2	314
PI_141632	No	Iran	Kadu	Cucurbita maxima	NA	NA	NA	Asia	0.550359	0.175587	0.079825	0.114581	0.05844	0.021209	2	387
PI_223353	No	Iran	No. 1478	Cucurbita maxima	NA	NA	Fruit pear-shaped, reddish, to 6 inches in diameter and 1 foot long.	Asia	0.205214	0.434515	1e-05	0.279391	0.023329	0.057541	5	114
PI_227361	No	Iran	No. 14869	Cucurbita maxima	NA	NA	NA	Asia	0.635558	0.179378	0.021822	0.076441	1e-05	0.086791	2	383
PI_137880	No	Iran	No. 5642	Cucurbita maxima	NA	NA	NA	Asia	0.583241	0.171911	0.0367	0.132535	0.075602	1e-05	2	385
PI_211992	No	Iran	No. 4	Cucurbita maxima	NA	NA	NA	Asia	0.215626	0.391956	0.096191	0.296207	1e-05	1e-05	5	111
PI_141633	No	Iran	Kadu	Cucurbita maxima	NA	NA	NA	Asia	0.349608	0.300638	0.018892	0.330841	1e-05	1e-05	5	121
PI_137862	No	Iran	Russian Kadu	Cucurbita maxima	NA	NA	Fruit 15 by 8 inches; rind orange red to paler, splotched with green, pinkish-white incomplete rib lines and heavily indented ribs; flesh orange, 2 inches thick, tender and insipid.	Asia	0.291317	0.191274	0.154968	0.174649	0.073532	0.11426	5	129
PI_143280	No	Iran	No. 7643	Cucurbita maxima	NA	NA	Fruit globose, 14 inches long, with deep irregular ribs, salmon, mottled paler; flesh 2 to 4 inches thick, pale orange, insipid.	Asia	0.270961	0.389547	0.110892	0.228581	1e-05	1e-05	5	112
PI_141637	No	Iran	Kaduetambal	Cucurbita maxima	NA	NA	NA	Asia	0.718429	0.262464	1e-05	1e-05	0.019077	1e-05	2	374
PI_143274	No	Iran	No. 7488	Cucurbita maxima	NA	NA	Fruit 18 inches long and 9 inches in diameter, orange red, with faint irregular ridb; flesh 1.25 inches thick, deep yellow, good quality.	Asia	0.356588	0.515808	0.005385	0.105176	1e-05	0.017033	5	187
PI_141661	No	Iran	Kadu	Cucurbita maxima	NA	NA	NA	Asia	0.421258	0.54365	1e-05	0.035063	1e-05	1e-05	5	189
PI_143278	No	Iran	No. 7595	Cucurbita maxima	NA	NA	Fruit subelliptical, 11 inches long, red; rind 2 inches thick, orange, insipid.	Asia	0.267642	0.381338	1e-05	0.35099	1e-05	1e-05	5	118
PI_211991	No	Iran	No. 3	Cucurbita maxima	NA	NA	NA	Asia	0.434622	0.343981	0.051985	0.148658	1e-05	0.020743	5	174
PI_226463	No	Iran	No. 14780	Cucurbita maxima	NA	NA	NA	Asia	0.585433	0.354091	0.005301	1.4e-05	0.055151	1e-05	5	170
PI_265558	No	Iran	Formerly PI 212010	Cucurbita maxima	NA	NA	NA	Asia	0.576126	0.423834	1e-05	1e-05	1e-05	1e-05	5	169
PI_143272	No	Iran	No. 7402	Cucurbita maxima	NA	NA	Fruit flattened, 11 inches long and 7 inches in diameter, deeply ribbed, orange red; flesh 5 inches thick, greenish yellow, firm, low in sugar.	Asia	0.142903	0.572576	0.044538	1e-05	1e-05	0.239962	5	184
PI_265561	No	Iran	Formerly PI 223353	Cucurbita maxima	NA	NA	NA	Asia	0.214868	0.644577	0.025085	0.102222	1e-05	0.013238	5	185
PI_137860	No	Iran	Kadu	Cucurbita maxima	NA	NA	Adapted to cotton country.	Asia	0.389352	0.346353	0.018696	0.103057	0.016072	0.12647	5	175
PI_211990	No	Iran	No. 2	Cucurbita maxima	NA	NA	NA	Asia	0.634492	0.225883	0.000596	1e-05	1e-05	0.139009	2	368
PI_211989	No	Iran	No. 1	Cucurbita maxima	NA	NA	NA	Asia	0.417902	0.163009	0.024644	0.147364	1e-05	0.24707	5	146
PI_137861	No	Iran	No. 5613	Cucurbita maxima	NA	NA	Said to be globose. Gorwn where summers are hot.	Asia	0.633704	0.298111	1e-05	1e-05	0.068155	1e-05	2	377
PI_137859	No	Iran	Kadu	Cucurbita maxima	NA	NA	Fruit elongate, 9 by 15 inches, rind gray green and unribbed; flesh yellow, 2 inches thich, and insipid.	Asia	0.612453	0.150606	0.001785	0.170257	0.00414	0.060759	2	381
PI_141665	No	Iran	No. 5927	Cucurbita maxima	NA	NA	Small, immature fruits, both round and elongate.	Asia	0.673934	0.326026	1e-05	1e-05	1e-05	1e-05	2	375
PI_141667	No	Iran	Kaduekombar	Cucurbita maxima	NA	NA	NA	Asia	0.595811	0.329939	0.056001	0.018229	1e-05	1e-05	5	171
PI_141648	No	Iran	Kaduehaluai	Cucurbita maxima	NA	NA	NA	Asia	0.130973	0.868987	1e-05	1e-05	1e-05	1e-05	5	157
PI_458741	No	Paraguay	TWW-107	Cucurbita maxima	NA	NA	Seeds medium-sized, white. From Manjuy Indians. Local name Zapallo.	South/Latin America	0.02175	1e-05	0.094612	0.525383	0.338533	0.019711	1	422
PI_458742	No	Paraguay	TWW-108	Cucurbita maxima	NA	NA	Seeds small, white. From Manjuy Indians. Local name Zapallo.	South/Latin America	1e-05	1e-05	0.05092	0.567611	0.314703	0.066746	1	421
PI_475748	No	Paraguay	TWW-112	Cucurbita maxima	NA	NA	Plants grown by Manjuy Indians for centuries, endemic. Seeds small, white. Local name Zapallo.	South/Latin America	0.063269	1e-05	0.052508	0.55385	0.330354	1e-05	1	423
PI_475749	No	Paraguay	TWW-113	Cucurbita maxima	NA	NA	Plants grown by Manjuy Indians for centuries, endemic. Seeds medium-sized, white. Local name Zapallo.	South/Latin America	0.06919	1e-05	1e-05	0.545528	0.385252	1e-05	1	419
PI_162890	No	Paraguay	No. 242	Cucurbita maxima	NA	NA	NA	South/Latin America	0.144733	1e-05	1e-05	0.464797	0.336541	0.053909	1	418
PI_224670	No	Turkey	Balkabagi	Cucurbita maxima	NA	NA	An orange turban squash.	Europe	0.057201	0.233121	0.107012	0.279648	1e-05	0.323008	5	110
PI_178893	No	Turkey	No. 9682	Cucurbita maxima	NA	NA	NA	Europe	0.430289	0.207227	0.03164	1e-05	0.078367	0.252468	5	155
PI_178892	No	Turkey	No. 9679	Cucurbita maxima	NA	NA	NA	Europe	0.327771	0.170267	1e-05	1e-05	1e-05	0.501933	3	294
PI_165077	No	Turkey	Balkabagi	Cucurbita maxima	NA	NA	NA	Europe	0.326932	0.113199	0.068499	0.298387	1e-05	0.192973	5	127
PI_165001	No	Turkey	Balkabagi	Cucurbita maxima	NA	NA	NA	Europe	0.273463	0.241041	1e-05	0.138797	0.000865	0.345825	5	137
PI_179265	No	Turkey	Kestane	Cucurbita maxima	NA	NA	NA	Europe	0.473722	0.164548	1e-05	1e-05	1e-05	0.3617	5	149
PI_178894	No	Turkey	Balkabagi	Cucurbita maxima	NA	NA	NA	Europe	0.301931	0.357235	1e-05	1e-05	1e-05	0.340804	5	135
PI_178890	No	Turkey	Balkabagi	Cucurbita maxima	NA	NA	NA	Europe	0.335541	0.211642	1e-05	0.372329	1e-05	0.080468	5	122
PI_199033	No	Turkey	No. 10624	Cucurbita maxima	NA	NA	NA	Europe	0.565383	0.012502	1e-05	0.087753	1e-05	0.334342	2	350
PI_164999	No	Turkey	Balkabagi	Cucurbita maxima	NA	NA	NA	Europe	0.472546	0.045742	1e-05	1e-05	0.058509	0.423182	5	141
PI_265555	No	Turkey	No Known Plant ID	Cucurbita maxima	NA	NA	NA	Europe	0.166079	0.555251	1e-05	0.115647	1e-05	0.163004	5	182
PI_165027	No	Turkey	Kestane Kabak	Cucurbita maxima	NA	NA	NA	Europe	0.19907	0.148061	0.026289	0.357046	1e-05	0.269524	5	125
PI_169419	No	Turkey	No. 1475	Cucurbita maxima	NA	NA	NA	Europe	0.685005	0.07557	1e-05	1e-05	0.118326	0.121079	2	361
PI_178891	No	Turkey	No. 9670	Cucurbita maxima	NA	NA	NA	Europe	0.259677	0.15184	1e-05	0.252755	0.079861	0.255856	5	124
PI_164995	No	Turkey	Citili Kabak	Cucurbita maxima	NA	NA	NA	Europe	0.391197	0.126459	1e-05	0.016122	1e-05	0.466202	5	144
PI_165005	No	Turkey	Beyazbal	Cucurbita maxima	NA	NA	NA	Europe	0.291263	0.243065	0.013758	1e-05	0.056234	0.395671	5	139
PI_169455	No	Turkey	Kara Kabak	Cucurbita maxima	NA	NA	NA	Europe	0.298655	1e-05	1e-05	0.111241	0.043045	0.547039	3	292
PI_173679	No	Turkey	No. 8611	Cucurbita maxima	NA	NA	NA	Europe	0.477776	0.069165	1e-05	1e-05	0.049052	0.403987	5	140
PI_175701	No	Turkey	No. 9124	Cucurbita maxima	NA	NA	NA	Europe	0.598017	0.022973	1e-05	0.024269	1e-05	0.354721	2	354
PI_175703	No	Turkey	Kedi	Cucurbita maxima	NA	NA	NA	Europe	0.635539	0.087701	0.005422	0.036196	1e-05	0.235132	2	343
PI_171624	No	Turkey	No. 6724	Cucurbita maxima	NA	NA	NA	Europe	0.618652	1e-05	1e-05	1e-05	0.100635	0.280683	2	347
PI_172853	No	Turkey	No. 7386	Cucurbita maxima	NA	NA	NA	Europe	0.769132	1e-05	0.011026	1e-05	0.147759	0.072064	2	363
PI_172854	No	Turkey	No. 7404	Cucurbita maxima	NA	NA	NA	Europe	0.55413	0.035975	0.023599	0.018598	0.111993	0.255705	2	348
PI_172869	No	Turkey	No. 8145	Cucurbita maxima	NA	NA	NA	Europe	0.892265	1e-05	1e-05	0.019366	1e-05	0.088338	2	302
PI_169440	No	Turkey	No. 2188	Cucurbita maxima	NA	NA	NA	Europe	0.792806	1e-05	0.04072	1e-05	1e-05	0.166443	2	317
PI_230180	No	Turkey	No Known Plant ID	Cucurbita maxima	NA	NA	Fruit flat, ribbed, about 14 inches in diameter; color brownish-gray; flesh deep orange, about 2 inches thick; late maturing.	Europe	0.456376	1e-05	0.053728	0.383176	0.065715	0.040995	2	331
PI_174191	No	Turkey	No. 8448	Cucurbita maxima	NA	NA	NA	Europe	0.611495	0.011118	1e-05	0.075312	1e-05	0.302055	2	351
PI_175698	No	Turkey	No. 6023	Cucurbita maxima	NA	NA	NA	Europe	0.855316	1e-05	1e-05	1e-05	1e-05	0.144644	2	318
PI_171614	No	Turkey	No. 6542	Cucurbita maxima	NA	NA	NA	Europe	0.4457	0.247032	1e-05	1e-05	0.050495	0.256754	5	156
PI_171615	No	Turkey	No. 6543	Cucurbita maxima	NA	NA	NA	Europe	0.303553	0.339274	1e-05	1e-05	1e-05	0.357143	5	136
PI_171616	No	Turkey	Kestane	Cucurbita maxima	NA	NA	NA	Europe	0.401281	0.138941	1e-05	0.073244	0.089791	0.296733	5	153
PI_169407	No	Turkey	Kabak Beyaz	Cucurbita maxima	NA	NA	NA	Europe	0.598067	1e-05	1e-05	0.156299	1e-05	0.245604	2	339
PI_169406	No	Turkey	Kabak Helvaci	Cucurbita maxima	NA	NA	NA	Europe	0.603461	0.212485	1e-05	0.004137	1e-05	0.179896	2	369
PI_177367	No	Turkey	No. 6266	Cucurbita maxima	NA	NA	NA	Europe	0.163639	0.745251	1e-05	1e-05	1e-05	0.091079	5	158
PI_178889	No	Turkey	Balkabagi	Cucurbita maxima	NA	NA	NA	Europe	0.192922	0.556189	1e-05	1e-05	1e-05	0.250859	5	183
PI_169411	No	Turkey	Kestane Kabagi	Cucurbita maxima	NA	NA	NA	Europe	0.580879	0.065291	0.074553	0.098569	0.180698	1e-05	2	359
PI_199031	No	Turkey	Kestane	Cucurbita maxima	NA	NA	NA	Europe	0.613927	0.060669	1e-05	1e-05	1e-05	0.325374	2	355
PI_169439	No	Turkey	Galle Kabak	Cucurbita maxima	NA	NA	NA	Europe	0.490819	0.093501	1e-05	0.102651	0.0208	0.292219	2	357
PI_164988	No	Turkey	Balkabagi	Cucurbita maxima	NA	NA	NA	Europe	1e-05	0.202902	1e-05	0.486717	0.184244	0.126117	1	417
PI_198672	No	Turkey	Balkabaghi	Cucurbita maxima	NA	NA	NA	Europe	0.06414	0.180531	0.10022	0.458699	1e-05	0.1964	5	108
PI_171617	No	Turkey	Cerkez	Cucurbita maxima	NA	NA	NA	Europe	0.595488	0.165971	1e-05	0.040298	1e-05	0.198223	2	366
PI_199032	No	Turkey	Sitaphal	Cucurbita maxima	NA	NA	NA	Europe	0.620725	0.077101	1e-05	0.042623	0.010114	0.249427	2	344
PI_169471	No	Turkey	No. 3397	Cucurbita maxima	NA	NA	NA	Europe	0.55834	1e-05	0.062616	0.036326	0.059439	0.283269	2	349
PI_176530	No	Turkey	Kestane	Cucurbita maxima	NA	NA	NA	Europe	0.330096	0.125761	0.057031	0.183557	1e-05	0.303544	5	147
PI_176960	No	Turkey	Kus	Cucurbita maxima	NA	NA	NA	Europe	0.894056	1e-05	1e-05	1e-05	1e-05	0.105904	2	301
PI_177366	No	Turkey	No. 4954	Cucurbita maxima	NA	NA	NA	Europe	0.372582	0.144134	1e-05	0.003368	0.016489	0.463417	5	145
PI_120440	No	Turkey	No. 3249	Cucurbita maxima	NA	NA	NA	Europe	0.267989	0.009946	1e-05	0.549822	0.172223	1e-05	1	408
PI_174181	No	Turkey	Balkabagi	Cucurbita maxima	NA	NA	NA	Europe	0.82613	1e-05	1e-05	1e-05	1e-05	0.17383	2	319
PI_176529	No	Turkey	Balkabagi	Cucurbita maxima	NA	NA	NA	Europe	0.340563	0.220224	1e-05	1e-05	1e-05	0.439183	5	138
PI_109277	No	Turkey	No. T-282	Cucurbita maxima	NA	NA	NA	Europe	0.112633	0.115099	1e-05	0.772238	1e-05	1e-05	1	394
PI_182195	No	Turkey	No. 10427	Cucurbita maxima	NA	NA	NA	Europe	0.436098	0.407171	0.034234	0.060767	1e-05	0.061719	5	179
PI_169466	No	Turkey	No. 3284	Cucurbita maxima	NA	NA	NA	Europe	0.58826	0.163538	1e-05	1e-05	0.058668	0.189515	2	365
PI_169433	No	Turkey	No. 1960	Cucurbita maxima	NA	NA	NA	Europe	0.663334	0.174327	1e-05	1e-05	1e-05	0.162308	2	367
PI_176528	No	Turkey	Balkabagi	Cucurbita maxima	NA	NA	NA	Europe	0.492633	0.395477	0.018484	0.003462	1e-05	0.089933	5	180
PI_183679	No	Turkey	Tevriv	Cucurbita maxima	NA	NA	NA	Europe	0.480593	0.1799	0.03569	1e-05	0.043443	0.260363	5	151
PI_171618	No	Turkey	Kestane	Cucurbita maxima	NA	NA	NA	Europe	0.463052	0.204341	1e-05	0.033549	0.069021	0.230028	5	154
PI_169405	No	Turkey	Bal Kabagi	Cucurbita maxima	NA	NA	NA	Europe	0.601661	1e-05	0.055078	1e-05	1e-05	0.343231	2	353
PI_176527	No	Turkey	Kestane	Cucurbita maxima	NA	NA	NA	Europe	0.405568	0.319898	0.033577	1e-05	0.009602	0.231346	5	134
PI_177365	No	Turkey	Helvaci	Cucurbita maxima	NA	NA	NA	Europe	0.318292	0.465217	0.027277	0.017759	1e-05	0.171445	5	181
PI_169404	No	Turkey	Kestane	Cucurbita maxima	NA	NA	NA	Europe	0.648939	0.099036	1e-05	1e-05	0.020742	0.231263	2	342
PI_181911	No	Syria	Hama No. 10	Cucurbita maxima	NA	NA	NA	Arab States	0.99995	1e-05	1e-05	1e-05	1e-05	1e-05	2	305
PI_179272	No	Syria	No. 9798	Cucurbita maxima	NA	NA	NA	Arab States	0.948249	1e-05	1e-05	0.009743	1e-05	0.041979	2	307
PI_534548	No	Syria	OA 278	Cucurbita maxima	Cultivated	NA	NA	Arab States	0.97472	1e-05	1e-05	1e-05	0.02524	1e-05	2	308
PI_534607	No	Syria	OD 10420	Cucurbita maxima	Cultivated	NA	NA	Arab States	0.99995	1e-05	1e-05	1e-05	1e-05	1e-05	2	304
PI_534550	No	Syria	OA 314	Cucurbita maxima	Cultivated	NA	NA	Arab States	0.928336	1e-05	1e-05	1e-05	0.071624	1e-05	2	311
PI_534547	No	Syria	OA 265	Cucurbita maxima	Cultivated	NA	NA	Arab States	0.920097	1e-05	1e-05	1e-05	0.079863	1e-05	2	313
PI_534612	No	Syria	OD 10569	Cucurbita maxima	Cultivated	NA	NA	Arab States	0.977209	0.022751	1e-05	1e-05	1e-05	1e-05	2	303
PI_534616	No	Syria	OM 10372	Cucurbita maxima	Cultivated	NA	NA	Arab States	0.952036	1e-05	1e-05	1e-05	0.047924	1e-05	2	309
PI_181943	No	Syria	Homs No. 8	Cucurbita maxima	NA	NA	NA	Arab States	0.85597	0.037413	1e-05	0.048341	0.011889	0.046377	2	298
PI_181877	No	Syria	Aleppo No. 11	Cucurbita maxima	NA	NA	NA	Arab States	0.934405	1e-05	1e-05	1e-05	0.065555	1e-05	2	310
PI_181879	No	Syria	Aleppo No. 44	Cucurbita maxima	NA	NA	NA	Arab States	0.746328	0.041007	1e-05	1e-05	1e-05	0.212635	2	341
PI_181751	No	Syria	No. 9739	Cucurbita maxima	NA	NA	NA	Arab States	0.99995	1e-05	1e-05	1e-05	1e-05	1e-05	2	306
PI_183259	No	Saudi Arabia	No. 2	Cucurbita maxima	NA	NA	NA	Arab States	0.907869	1e-05	1e-05	1e-05	0.092091	1e-05	2	312
PI_186488	No	Africa	No Known Pland ID	Cucurbita maxima	NA	NA	NA	Africa	0.107957	0.073782	0.208882	0.477938	0.020377	0.111063	1	453
PI_188694	No	Africa	No Known Plant ID	Cucurbita maxima	NA	NA	NA	Africa	0.59449	1e-05	0.027308	1e-05	1e-05	0.378172	2	352
PI_194268	No	Ethiopia	No. 9062	Cucurbita maxima	NA	NA	NA	Africa	0.700923	0.054436	1e-05	1e-05	1e-05	0.244611	2	340
PI_195929	No	Ethiopia	No. 9902	Cucurbita maxima	NA	NA	NA	Africa	0.511157	0.110289	1e-05	1e-05	0.075781	0.302753	5	150
PI_193500	No	Ethiopia	No. 8751	Cucurbita maxima	NA	NA	NA	Africa	0.269842	0.314257	0.066855	0.191283	1e-05	0.157754	5	130
PI_628618	No	Ethiopia	2122	Cucurbita maxima	Uncertain	NA	Split from PI 273656 because of different species identification.	Africa	0.582903	0.152042	0.006074	0.128288	0.044292	0.086401	2	380
PI_273654	No	Ethiopia	2049	Cucurbita maxima	NA	NA	NA	Africa	0.550844	1e-05	0.045639	1e-05	0.189487	0.21401	2	346
PI_409734	No	South Africa	No. 1937	Cucurbita maxima	NA	NA	NA	Africa	0.090986	0.024879	1e-05	0.884105	1e-05	1e-05	1	392
PI_295342	No	Australia	Butter Pumpkin	Cucurbita maxima	NA	NA	NA	Australia	0.130878	1e-05	1e-05	0.869082	1e-05	1e-05	1	390
PI_289699	No	Australia	Crown Prince	Cucurbita maxima	NA	NA	NA	Australia	1e-05	0.028285	0.023382	0.653552	0.253643	0.041128	1	425
PI_218072	No	Pakistan	Alva Kadu	Cucurbita maxima	NA	NA	Large red pumpkin.	Asia	0.721012	1e-05	0.068824	1e-05	0.210134	1e-05	2	362
PI_135893	No	Pakistan	No. 5088	Cucurbita maxima	NA	NA	Fruit subglobose, 17 inches long, rind salmon, with deeply indented ribs; flesh salmon, 2.75 inches thick, and incipid.	Asia	0.786518	1e-05	0.050801	0.03548	0.119962	0.007229	2	364
PI_135892	No	Pakistan	No. 5087	Cucurbita maxima	NA	NA	Fruit flattened, 17 by 9 inches; rind Chinese red, deeply indented ribs; flesh orange, 2 to 3 inches thick, and insipid.	Asia	0.506541	0.001153	1e-05	0.125808	0.080441	0.286046	2	356
PI_135889	No	Pakistan	No. 5084	Cucurbita maxima	NA	NA	Fruit subglobose, 15 inches long, faintly ribbed, creamy white; flest pale orange, 1.5 to 2.5 inches thick, and incipid.	Asia	0.776484	0.075175	0.073064	0.075257	1e-05	1e-05	2	320
PI_265559	No	Pakistan	Formerly PI 219694	Cucurbita maxima	NA	NA	NA	Asia	0.777251	0.152483	0.002698	0.067548	1e-05	1e-05	2	372
PI_267749	No	United Kingdom	'Turk's Cap Pumpkin'	Cucurbita maxima	NA	NA	Plants medium vigor, early maturing; fruit reddish orange, rough, 6 by 9 inches, convex swelling at blossom end.	Europe	1e-05	0.046875	1e-05	0.953085	1e-05	1e-05	1	395
PI_298036	No	Austria	No Known Plant ID	Cucurbita maxima	NA	NA	NA	Europe	0.069468	0.003172	0.039872	0.03901	0.572295	0.276182	6	21
PI_184745	No	Austria	No Known Plant ID	Cucurbita maxima	NA	NA	NA	Europe	0.205123	0.204041	1e-05	0.131283	1e-05	0.459533	3	291
PI_357876	No	Macedonia	Vojnicka	Cucurbita maxima	NA	NA	NA	Europe	1e-05	0.328484	1e-05	1e-05	1e-05	0.671476	3	283
PI_368577	No	Macedonia	Pecenka	Cucurbita maxima	NA	NA	NA	Europe	1e-05	0.159241	0.011256	0.003255	1e-05	0.826228	3	265
PI_368561	No	Macedonia	Bela Pecenka	Cucurbita maxima	NA	NA	NA	Europe	0.040957	0.069088	0.020051	0.572008	1e-05	0.297885	5	106
PI_370453	No	Macedonia	Penceka Lokalna	Cucurbita maxima	NA	NA	NA	Europe	0.06871	0.146542	1e-05	1e-05	1e-05	0.784718	3	261
PI_357889	No	Macedonia	Stracinska Pecenka	Cucurbita maxima	NA	NA	NA	Europe	0.032218	1.9e-05	0.080159	1e-05	0.034945	0.852649	3	245
PI_357890	No	Macedonia	Pencenka	Cucurbita maxima	NA	NA	NA	Europe	0.059147	0.085293	0.015772	1e-05	0.010206	0.829573	3	243
PI_379304	No	Macedonia	Balka	Cucurbita maxima	NA	NA	NA	Europe	0.270592	0.175755	1e-05	1e-05	1e-05	0.553623	3	293
PI_357911	No	Macedonia	Pecenka Od Rastak	Cucurbita maxima	NA	NA	NA	Europe	0.115845	0.146196	1e-05	0.040808	1e-05	0.697131	3	255
PI_368567	No	Macedonia	Pecneka	Cucurbita maxima	NA	NA	NA	Europe	0.053211	0.256759	0.012176	0.061848	1e-05	0.615997	3	287
PI_370452	No	Macedonia	Golema	Cucurbita maxima	NA	NA	NA	Europe	0.170932	0.104405	0.010263	1e-05	1e-05	0.71438	3	259
PI_357880	No	Macedonia	Siva Stambolka	Cucurbita maxima	NA	NA	NA	Europe	1e-05	0.012457	1e-05	1e-05	1e-05	0.987503	3	224
PI_357898	No	Macedonia	Amzibegovska	Cucurbita maxima	NA	NA	NA	Europe	0.10349	0.125801	1e-05	1e-05	0.015164	0.755525	3	250
PI_370460	No	Macedonia	Pecenka Mestna	Cucurbita maxima	NA	NA	NA	Europe	1e-05	0.083932	1e-05	1e-05	1e-05	0.916028	3	232
PI_357896	No	Macedonia	Kumanovska	Cucurbita maxima	NA	NA	NA	Europe	1e-05	0.141897	0.033386	1e-05	1e-05	0.824687	3	264
PI_357888	No	Macedonia	Bela Pecenka	Cucurbita maxima	NA	NA	NA	Europe	0.071252	0.089729	1e-05	1e-05	1e-05	0.838989	3	242
PI_379294	No	Macedonia	Pecenka	Cucurbita maxima	NA	NA	NA	Europe	0.023985	1e-05	0.06378	1e-05	1e-05	0.912205	3	246
PI_368582	No	Macedonia	Stambolka	Cucurbita maxima	NA	NA	NA	Europe	1e-05	0.088573	1e-05	1e-05	1e-05	0.911387	3	231
PI_357912	No	Macedonia	Stambolka	Cucurbita maxima	NA	NA	NA	Europe	1e-05	0.269356	1e-05	1e-05	1e-05	0.730604	3	274
PI_370457	No	Macedonia	Kolacarka	Cucurbita maxima	NA	NA	NA	Europe	0.079318	0.11717	1e-05	0.046422	1e-05	0.757069	3	253
PI_357897	No	Macedonia	Vezenka	Cucurbita maxima	NA	NA	NA	Europe	0.053185	0.119094	0.032265	1e-05	1e-05	0.795436	3	260
PI_357891	No	Macedonia	UKRASNA CALMA	Cucurbita maxima	NA	NA	NA	Europe	1e-05	0.99995	1e-05	1e-05	1e-05	1e-05	5	164
PI_379303	No	Macedonia	Pecenka	Cucurbita maxima	NA	NA	NA	Europe	1e-05	1e-05	1e-05	1e-05	1e-05	0.99995	3	228
PI_357875	No	Macedonia	Kumanovska	Cucurbita maxima	NA	NA	NA	Europe	0.039894	0.154073	1e-05	0.005003	1e-05	0.801011	3	263
PI_357899	No	Macedonia	Zrnovska	Cucurbita maxima	NA	NA	NA	Europe	1e-05	1e-05	1e-05	1e-05	1e-05	0.99995	3	229
PI_368575	No	Macedonia	Pecenka	Cucurbita maxima	NA	NA	NA	Europe	1e-05	0.320228	1e-05	1e-05	1e-05	0.679732	3	282
PI_357882	No	Macedonia	Krusovidna	Cucurbita maxima	NA	NA	NA	Europe	0.078654	0.30671	1e-05	1e-05	1e-05	0.614606	3	288
PI_368583	No	Macedonia	Pecenka	Cucurbita maxima	NA	NA	NA	Europe	1e-05	0.353859	0.00204	0.025477	1e-05	0.618603	3	280
PI_368565	No	Macedonia	Pecneka	Cucurbita maxima	NA	NA	NA	Europe	0.197516	1e-05	1e-05	1e-05	1e-05	0.802444	3	256
PI_357903	No	Macedonia	Brzak	Cucurbita maxima	NA	NA	NA	Europe	0.104528	0.220319	1e-05	1e-05	1e-05	0.675123	3	272
PI_379295	No	Macedonia	Pecenka	Cucurbita maxima	NA	NA	NA	Europe	0.391651	0.10962	0.074929	0.019773	1e-05	0.404017	5	142
PI_379297	No	Macedonia	Pecenka	Cucurbita maxima	NA	NA	NA	Europe	0.122294	0.111031	1e-05	1e-05	0.004104	0.762552	3	251
PI_357894	No	Macedonia	Stambolka Pecenka	Cucurbita maxima	NA	NA	NA	Europe	0.011133	0.095423	0.003655	1e-05	1e-05	0.889769	3	234
PI_379300	No	Macedonia	Balka	Cucurbita maxima	NA	NA	NA	Europe	0.004311	0.094726	0.026073	1e-05	1e-05	0.87487	3	235
PI_379301	No	Macedonia	Balka	Cucurbita maxima	NA	NA	NA	Europe	1e-05	0.110936	1e-05	1e-05	0.041289	0.847745	3	236
PI_357910	No	Macedonia	Zelenikovska	Cucurbita maxima	NA	NA	NA	Europe	1e-05	0.079218	0.029159	1e-05	0.063564	0.828039	3	247
PI_370459	No	Macedonia	Pecenka Domasna	Cucurbita maxima	NA	NA	NA	Europe	0.075793	0.000685	1e-05	1e-05	0.067163	0.856339	3	240
PI_357908	No	Macedonia	Gostivarska	Cucurbita maxima	NA	NA	NA	Europe	0.029885	0.122306	1e-05	1e-05	1e-05	0.847779	3	266
PI_368576	No	Macedonia	Pecenka Srpska	Cucurbita maxima	NA	NA	NA	Europe	1e-05	0.080332	1e-05	1e-05	0.031064	0.888574	3	238
PI_368578	No	Macedonia	Pecenka	Cucurbita maxima	NA	NA	NA	Europe	0.01313	0.075776	1e-05	1e-05	0.049211	0.861863	3	237
PI_357887	No	Macedonia	Crna Stambolka	Cucurbita maxima	NA	NA	NA	Europe	0.022608	0.230318	1e-05	1e-05	1e-05	0.747044	3	276
PI_379290	No	Macedonia	Stambolka	Cucurbita maxima	NA	NA	NA	Europe	1e-05	0.137838	1e-05	1e-05	1e-05	0.862122	3	267
PI_379291	No	Macedonia	Pecenka	Cucurbita maxima	NA	NA	NA	Europe	0.018474	0.250294	1e-05	1e-05	1e-05	0.731202	3	277
PI_379292	No	Macedonia	Pecenka	Cucurbita maxima	NA	NA	NA	Europe	0.237661	0.039887	1e-05	0.014016	0.041325	0.667101	3	257
PI_370454	No	Macedonia	Pecenka Mestna	Cucurbita maxima	NA	NA	NA	Europe	1e-05	0.237776	1e-05	1e-05	0.024393	0.737801	3	275
PI_370456	No	Macedonia	Pecenka Mestna	Cucurbita maxima	NA	NA	NA	Europe	0.178068	0.124614	1e-05	1e-05	0.08749	0.609807	3	295
PI_368570	No	Macedonia	Stambolka	Cucurbita maxima	NA	NA	NA	Europe	1e-05	0.290552	1e-05	1e-05	1e-05	0.709408	3	273
PI_370458	No	Macedonia	Pecenka Lokalna	Cucurbita maxima	NA	NA	NA	Europe	0.089674	0.176554	0.034828	1e-05	1e-05	0.698924	3	269
PI_357871	No	Macedonia	Pencenka	Cucurbita maxima	NA	NA	NA	Europe	0.006493	0.301049	1e-05	1e-05	0.089637	0.602801	3	285
PI_357872	No	Macedonia	Grdovska	Cucurbita maxima	NA	NA	NA	Europe	1e-05	0.016647	1e-05	1e-05	0.119755	0.863568	3	249
PI_368563	No	Macedonia	Pecneka	Cucurbita maxima	NA	NA	NA	Europe	0.388451	0.105019	1e-05	1e-05	1e-05	0.5065	5	143
PI_370461	No	Macedonia	Badarska	Cucurbita maxima	NA	NA	NA	Europe	0.185621	0.104864	1e-05	0.022414	1e-05	0.687081	3	258
PI_357881	No	Macedonia	Sivobela	Cucurbita maxima	NA	NA	NA	Europe	0.062744	0.212496	0.004048	0.038321	0.005233	0.677157	3	270
PI_368580	No	Macedonia	Stambolka	Cucurbita maxima	NA	NA	NA	Europe	0.076274	0.047937	1e-05	0.021868	0.048548	0.805363	3	239
PI_368568	No	Macedonia	Balka	Cucurbita maxima	NA	NA	NA	Europe	0.083236	0.227589	0.015087	1e-05	1e-05	0.674068	3	271
PI_368564	No	Macedonia	Pecneka	Cucurbita maxima	NA	NA	NA	Europe	0.184946	0.174591	1e-05	1e-05	0.010018	0.630425	3	296
PI_357902	No	Macedonia	Tromak	Cucurbita maxima	NA	NA	NA	Europe	0.116595	0.259184	1e-05	1e-05	1e-05	0.624191	3	289
PI_368572	No	Macedonia	Pecenka Bela	Cucurbita maxima	NA	NA	NA	Europe	1e-05	0.030985	0.000108	0.033838	0.086495	0.848564	3	248
PI_368573	No	Macedonia	Stambolka Bela	Cucurbita maxima	NA	NA	NA	Europe	0.117748	0.031264	0.023781	1e-05	1e-05	0.827187	3	241
PI_357904	No	Macedonia	Romanska	Cucurbita maxima	NA	NA	NA	Europe	1e-05	1e-05	0.005127	0.022264	0.364544	0.608045	3	279
PI_379298	No	Macedonia	Balka	Cucurbita maxima	NA	NA	NA	Europe	0.060582	0.076506	0.077132	0.785759	1e-05	1e-05	1	393
PI_379305	No	Macedonia	Pecenka	Cucurbita maxima	NA	NA	NA	Europe	0.121512	0.113722	1e-05	0.048517	1e-05	0.716228	3	254
PI_379289	No	Macedonia	Stambolska	Cucurbita maxima	NA	NA	NA	Europe	1e-05	1e-05	1e-05	0.000869	1e-05	0.999091	3	225
PI_357915	No	Macedonia	Ukrasna	Cucurbita maxima	NA	NA	NA	Europe	1e-05	0.896235	1e-05	1e-05	1e-05	0.103725	5	162
PI_357900	No	Macedonia	Buciska	Cucurbita maxima	NA	NA	NA	Europe	1e-05	1e-05	1e-05	1e-05	1e-05	0.99995	3	227
PI_357901	No	Macedonia	Probistipska	Cucurbita maxima	NA	NA	NA	Europe	0.031117	0.317485	0.044546	1e-05	0.027865	0.578977	3	284
PI_357906	No	Macedonia	Siva Pecenka	Cucurbita maxima	NA	NA	NA	Europe	0.047238	0.142446	1e-05	1e-05	1e-05	0.810286	3	262
PI_357907	No	Macedonia	Struska	Cucurbita maxima	NA	NA	NA	Europe	0.201541	0.155036	0.060161	1e-05	0.010125	0.573127	3	297
PI_368562	No	Macedonia	Ukrasna Tikva	Cucurbita maxima	NA	NA	NA	Europe	1e-05	0.890284	1e-05	1e-05	1e-05	0.109676	5	161
PI_368571	No	Macedonia	Stambolka Kupasta	Cucurbita maxima	NA	NA	NA	Europe	1e-05	0.347343	1e-05	1e-05	1e-05	0.652617	3	281
PI_357879	No	Macedonia	Stambolka	Cucurbita maxima	NA	NA	NA	Europe	0.139616	0.30703	1e-05	1e-05	0.015838	0.537496	3	286
PI_357914	No	Macedonia	Bela Pecenka	Cucurbita maxima	NA	NA	NA	Europe	0.502595	0.148405	0.052606	1e-05	1e-05	0.296375	5	152
PI_357877	No	Macedonia	Opilska	Cucurbita maxima	NA	NA	NA	Europe	1e-05	0.146545	1e-05	1e-05	1e-05	0.853415	3	268
PI_357905	No	Macedonia	Debarska	Cucurbita maxima	NA	NA	NA	Europe	1e-05	0.119116	0.001206	1e-05	1e-05	0.879648	3	233
PI_379288	No	Slovenia	Pecenka	Cucurbita maxima	NA	NA	NA	Europe	0.137265	0.092341	1e-05	1e-05	1e-05	0.770364	3	252
PI_93801	No	China	No Known Plant ID	Cucurbita maxima	NA	NA	NA	Asia	1e-05	0.294549	1e-05	0.524292	0.181128	1e-05	1	416
PI_419138	No	China	No Known Plant ID	Cucurbita maxima	NA	NA	Summer type.	Asia	0.062204	0.146807	1e-05	0.233635	0.557334	1e-05	6	88
PI_419081	No	China	Pai Yu	Cucurbita maxima	NA	NA	NA	Asia	0.023744	0.084869	1e-05	0.287196	0.532674	0.071507	6	87
PI_419080	No	China	Hong Pi	Cucurbita maxima	NA	NA	NA	Asia	1e-05	0.202083	1e-05	0.776723	1e-05	0.021163	1	434
PI_419139	No	China	No Known Plant ID	Cucurbita maxima	NA	NA	Sugar type. Seeds white.	Asia	1e-05	0.206976	0.010231	0.707304	0.050562	0.024917	1	435
PI_407383	No	China	Lot 1	Cucurbita maxima	NA	NA	NA	Asia	1e-05	0.308909	0.014557	0.633366	0.043149	1e-05	1	437
PI_407385	No	China	Lot 3	Cucurbita maxima	NA	NA	NA	Asia	1e-05	0.223984	1e-05	0.648663	1e-05	0.127323	1	428
PI_93034	No	China	'Nan Kua'	Cucurbita maxima	NA	NA	A very large squash obtained through Dr. Hugh W. Hubbard, of Paotingfu, China.	Asia	0.35095	0.072568	1e-05	0.444144	0.132319	1e-05	1	411
PI_481619	No	Italy	70	Cucurbita maxima	Cultivated	NA	Local original source. Sown April, harvested September. Fruits round with brown skin. Local name Kakara.	Europe	1e-05	0.032727	0.046729	0.770623	0.08357	0.066343	1	405
PI_481623	No	Italy	236	Cucurbita maxima	Cultivated	NA	Originally from Thimphu. Sown April, harvested August-September. Fruits very large (20kg or more), less favorable than PI 481622, used for animal feed.	Europe	1e-05	0.079022	0.097501	0.438516	0.196507	0.188445	5	103
PI_481624	No	Italy	312	Cucurbita maxima	Cultivated	NA	Local original source. Sown March, harvested September. Local name Brumsha.	Europe	1e-05	0.003763	0.057846	0.677895	0.242921	0.017564	1	424
PI_481626	No	Italy	472	Cucurbita maxima	Cultivated	NA	Local original source. Sown May, harvested September-October. Local name Kakura.	Europe	0.01385	0.046791	1e-05	0.80926	0.085188	0.044901	1	404
PI_481627	No	Italy	482	Cucurbita maxima	Cultivated	NA	Local original source. Sown February, harvested September. Local name Kukura.	Europe	1e-05	1e-05	0.09878	0.676426	0.103377	0.121397	1	459
PI_481625	No	Italy	358	Cucurbita maxima	Cultivated	NA	Local original source. Sown April, harvested September. Fruits large. Local name Brumsa Kathang.	Europe	1e-05	1e-05	0.140397	0.560417	0.266562	0.032605	1	420
PI_526246	No	Zimbabwe	AMM 928	Cucurbita maxima	Landrace	NA	NA	Africa	1e-05	0.118134	0.091479	0.376497	0.337288	0.076592	5	104
PI_494835	No	Zimbabwe	ZFA 3389	Cucurbita maxima	Landrace	NA	Received as Cucurbita moschata.	Africa	1e-05	1e-05	1e-05	1e-05	0.99995	1e-05	6	34
PI_494834	No	Zimbabwe	ZFA 3378	Cucurbita maxima	Landrace	NA	Leaves and fruit eaten. Local name Tumaka. Received as Cucurbita moschata.	Africa	1e-05	1e-05	1e-05	1e-05	0.965503	0.034457	6	30
PI_482485	No	Zimbabwe	Dindimanga	Cucurbita maxima	Cultivated	NA	Sown November, harvested April. Local name Dindimanga.	Africa	1e-05	1e-05	1e-05	0.164452	0.607761	0.227756	6	101
PI_482468	No	Zimbabwe	TGR 581	Cucurbita maxima	Cultivated	NA	Sown October, harvested April.	Africa	1e-05	1e-05	0.009715	0.291501	0.569553	0.129211	6	98
PI_482475	No	Zimbabwe	TGR 1107	Cucurbita maxima	Cultivated	NA	Fruits flat, round, creamy yellow.	Africa	0.240697	0.041393	0.075267	0.096814	0.513715	0.032114	6	5
PI_494830	No	Zimbabwe	ZFA 3252	Cucurbita maxima	Landrace	NA	Fruit shape elongated. Received as Cucurbita moschata.	Africa	1e-05	1e-05	1e-05	1e-05	0.99995	1e-05	6	35
PI_482483	No	Zimbabwe	TGR 1783	Cucurbita maxima	Cultivated	NA	Sown November, harvested April.	Africa	0.146761	1e-05	1e-05	0.036302	0.470904	0.346014	6	20
PI_494839	No	Zimbabwe	ZFA 3545	Cucurbita maxima	Landrace	NA	Received as Cucurbita moschata.	Africa	0.005841	1e-05	1e-05	0.006972	0.941496	0.045671	6	31
PI_494831	No	Zimbabwe	ZFA 3253	Cucurbita maxima	Landrace	NA	Fruit round. Received as Cucurbita moschata.	Africa	0.067302	1e-05	0.008243	0.00085	0.923585	1e-05	6	55
PI_482471	No	Zimbabwe	Mutala	Cucurbita maxima	Cultivated	NA	Local name Mutala.	Africa	0.241439	0.019651	1e-05	0.159203	0.523481	0.056215	6	8
PI_494827	No	Zimbabwe	ZFA 3177	Cucurbita maxima	Landrace	NA	Received as Cucurbita moschata.	Africa	0.01875	1e-05	0.007771	1e-05	0.973449	1e-05	6	45
PI_482482	No	Zimbabwe	TGR 1548	Cucurbita maxima	Cultivated	NA	Sown November, harvested April.	Africa	0.247077	0.044978	1e-05	0.09915	0.430285	0.1785	6	6
PI_482467	No	Zimbabwe	TGR 306	Cucurbita maxima	Cultivated	NA	Sown November, harvested April.	Africa	0.077184	0.011973	1e-05	0.137942	0.491552	0.281339	6	22
PI_482523	No	Zimbabwe	TGR 906B	Cucurbita maxima	Cultivated	NA	Sown October. Fruits of mixed types.	Africa	0.245886	1e-05	1e-05	0.165255	0.503725	0.085114	6	7
PI_482479	No	Zimbabwe	Nyamutumha	Cucurbita maxima	Cultivated	NA	Seeds white. Local name Nyamutumha and Nzururu.	Africa	0.084907	0.05866	0.008691	0.069679	0.658958	0.119106	6	93
PI_482472	No	Zimbabwe	Fere	Cucurbita maxima	Cultivated	NA	Sown December. Fruits flat, white. Local name Fere.	Africa	0.132249	0.044366	1e-05	0.098652	0.57402	0.150703	6	95
PI_482589	No	Zimbabwe	TGR 233	Cucurbita maxima	Cultivated	NA	Fruits white. Associated with pumpkins and other weedy, bitter watermelons.	Africa	0.134655	0.056481	1e-05	0.102136	0.554776	0.151943	6	96
PI_482477	No	Zimbabwe	Nyamutumha	Cucurbita maxima	Cultivated	NA	Local name Nyamutumba.	Africa	0.03342	0.002006	1e-05	0.240402	0.613668	0.110493	6	97
PI_482478	No	Zimbabwe	TGR 1243	Cucurbita maxima	Cultivated	NA	NA	Africa	0.126148	0.040988	0.001525	0.218363	0.568999	0.043976	6	86
PI_490350	No	Burkina Faso	Yogue	Cucurbita maxima	Cultivated	NA	Local name Yogue.	Africa	0.330018	0.041362	0.011328	0.260458	0.263994	0.092841	6	1
PI_490353	No	Burkina Faso	Gui	Cucurbita maxima	Cultivated	NA	Fruit cylindrical, 30cm long, 20cm in diameter. Local name Gui.	Africa	0.66332	1e-05	0.051409	0.093262	0.0243	0.167699	2	338
PI_490352	No	Burkina Faso	Yogorou	Cucurbita maxima	Cultivated	NA	Pulp cooked for sauce. Local name Yogorou.	Africa	0.818561	1e-05	0.010222	0.101636	0.041394	0.028176	2	321
PI_500453	No	Zambia	ZM-1207	Cucurbita maxima	Cultivated	NA	NA	Africa	0.063552	0.036476	0.032574	1e-05	0.793409	0.073979	6	77
PI_500476	No	Zambia	ZM-1681	Cucurbita maxima	Cultivated	NA	NA	Africa	1e-05	1e-05	1e-05	1e-05	0.99995	1e-05	6	42
PI_500483	No	Zambia	ZM-1767	Cucurbita maxima	Cultivated	NA	NA	Africa	0.087149	1e-05	1e-05	1e-05	0.86996	0.042861	6	56
PI_500511	No	Zambia	ZM-2329	Cucurbita maxima	Cultivated	NA	NA	Africa	0.075333	1e-05	1e-05	0.0581	0.866537	1e-05	6	64
PI_500512	No	Zambia	ZM-2338	Cucurbita maxima	Cultivated	NA	NA	Africa	0.220824	0.168764	1e-05	1e-05	0.479409	0.130983	6	19
PI_500469	No	Zambia	ZM-1412	Cucurbita maxima	Cultivated	NA	NA	Africa	0.040464	0.011939	1e-05	0.035835	0.842652	0.0691	6	74
PI_500477	No	Zambia	ZM-1692	Cucurbita maxima	Cultivated	NA	NA	Africa	1e-05	1e-05	1e-05	1e-05	0.99995	1e-05	6	40
PI_500534	No	Zambia	ZM-3066	Cucurbita maxima	Cultivated	NA	NA	Africa	0.002558	1e-05	0.044845	0.012862	0.939716	1e-05	6	24
PI_500452	No	Zambia	ZM-1201	Cucurbita maxima	Cultivated	NA	NA	Africa	0.195527	1e-05	1e-05	0.125735	0.671351	0.007367	6	11
PI_500467	No	Zambia	ZM-1319	Cucurbita maxima	Cultivated	NA	NA	Africa	0.010406	0.014335	1e-05	0.088789	0.790382	0.096078	6	84
PI_500454	No	Zambia	ZM-1213	Cucurbita maxima	Cultivated	NA	NA	Africa	0.201964	0.087373	0.022362	0.010541	0.67775	1e-05	6	13
PI_500459	No	Zambia	ZM-1251	Cucurbita maxima	Cultivated	NA	NA	Africa	1e-05	0.049385	0.044832	0.014283	0.825547	0.065943	6	80
PI_500460	No	Zambia	ZM-1254	Cucurbita maxima	Cultivated	NA	NA	Africa	0.095503	0.002802	0.049293	0.05413	0.798262	1e-05	6	70
PI_500519	No	Zambia	Fipushi	Cucurbita maxima	Cultivated	NA	Local name Fipushi.	Africa	1e-05	1e-05	0.046223	0.001596	0.952151	1e-05	6	25
PI_500462	No	Zambia	Mapusi	Cucurbita maxima	Cultivated	NA	Mixed with C. moschata. Local name Mapusi.	Africa	0.043781	0.038483	1e-05	0.046461	0.815173	0.056091	6	73
PI_500465	No	Zambia	ZM-1311	Cucurbita maxima	Cultivated	NA	NA	Africa	0.035738	1e-05	0.053024	0.069957	0.841262	1e-05	6	52
PI_500517	No	Zambia	ZM-2525	Cucurbita maxima	Cultivated	NA	NA	Africa	1e-05	1e-05	0.01496	0.110835	0.874175	1e-05	6	49
PI_500472	No	Zambia	ZM-1529	Cucurbita maxima	Cultivated	NA	NA	Africa	1e-05	1e-05	1e-05	1e-05	0.99995	1e-05	6	39
PI_500533	No	Zambia	ZM-2973	Cucurbita maxima	Cultivated	NA	NA	Africa	1e-05	1e-05	1e-05	1e-05	0.99995	1e-05	6	36
PI_500486	No	Zambia	ZM-1811	Cucurbita maxima	Cultivated	NA	NA	Africa	0.082189	1e-05	1e-05	1e-05	0.917771	1e-05	6	54
PI_500492	No	Zambia	ZM-1964	Cucurbita maxima	Cultivated	NA	NA	Africa	0.005665	1e-05	1e-05	1e-05	0.994295	1e-05	6	43
PI_500481	No	Zambia	ZM-1731	Cucurbita maxima	Cultivated	NA	Mixed with C. moschata.	Africa	1e-05	1e-05	1e-05	1e-05	0.99995	1e-05	6	41
PI_500508	No	Zambia	ZM-2223	Cucurbita maxima	Cultivated	NA	NA	Africa	0.044703	0.020665	0.018554	1e-05	0.900292	0.015774	6	53
PI_500458	No	Zambia	ZM-1250	Cucurbita maxima	Cultivated	NA	NA	Africa	0.050389	0.047739	0.023971	1e-05	0.777844	0.100047	6	78
PI_500510	No	Zambia	ZM-2318	Cucurbita maxima	Cultivated	NA	Mixed C. moschata.	Africa	0.005933	0.045017	1e-05	1e-05	0.918031	0.030999	6	27
PI_500527	No	Zambia	ZM-2759	Cucurbita maxima	Cultivated	NA	NA	Africa	1e-05	1e-05	1e-05	1e-05	0.99995	1e-05	6	37
PI_500461	No	Zambia	ZM-1263	Cucurbita maxima	Cultivated	NA	Mixed with C. moschata.	Africa	0.030957	1e-05	0.036672	0.092621	0.738324	0.101417	6	82
PI_500446	No	Zambia	ZM-1166	Cucurbita maxima	Wild	NA	NA	Africa	1e-05	0.052196	0.027427	0.099018	0.714681	0.106667	6	83
PI_500515	No	Zambia	ZM-2480	Cucurbita maxima	Cultivated	NA	NA	Africa	0.084821	0.038105	1e-05	0.048353	0.828701	1e-05	6	71
PI_500450	No	Zambia	Mgwunga	Cucurbita maxima	Cultivated	NA	Local name Mgwunga.	Africa	0.014492	1e-05	1e-05	0.142219	0.766105	0.077164	6	85
PI_500518	No	Zambia	Fipushi	Cucurbita maxima	Cultivated	NA	Local name Fipushi.	Africa	1e-05	0.071025	1e-05	1e-05	0.928935	1e-05	6	28
PI_500468	No	Zambia	ZM-1358	Cucurbita maxima	Cultivated	NA	NA	Africa	0.10597	1e-05	1e-05	1e-05	0.89399	1e-05	6	59
PI_500509	No	Zambia	Chipnushi	Cucurbita maxima	Cultivated	NA	Local name Chipnushi.	Africa	1e-05	0.026902	0.02065	0.067573	0.826974	0.057891	6	76
PI_500521	No	Zambia	Efipushi	Cucurbita maxima	Cultivated	NA	Local name Efipushi.	Africa	1e-05	1e-05	0.065468	1e-05	0.903935	0.030567	6	23
PI_500457	No	Zambia	ZM-1242	Cucurbita maxima	Cultivated	NA	NA	Africa	0.052015	0.096563	1e-05	0.073898	0.772921	0.004593	6	68
PI_500456	No	Zambia	ZM-1220	Cucurbita maxima	Cultivated	NA	NA	Africa	0.009741	0.058937	1e-05	1e-05	0.830138	0.101163	6	79
PI_500445	No	Zambia	ZM-1084	Cucurbita maxima	Cultivated	NA	NA	Africa	0.102238	1e-05	1e-05	0.010508	0.887224	1e-05	6	58
PI_500526	No	Zambia	ZM-2756	Cucurbita maxima	Cultivated	NA	NA	Africa	1e-05	0.008472	0.050154	0.059921	0.864342	0.017101	6	51
PI_500442	No	Zambia	Chipushila Bemba	Cucurbita maxima	Wild	NA	Leaves and fruits eaten. Local name Chipushilu Bemba.	Africa	1e-05	1e-05	1e-05	0.064705	0.935255	1e-05	6	29
PI_500444	No	Zambia	ZM-1071	Cucurbita maxima	Cultivated	NA	NA	Africa	1e-05	1e-05	1e-05	0.142093	0.680624	0.177253	6	100
PI_500532	No	Zambia	ZM-2948	Cucurbita maxima	Cultivated	NA	NA	Africa	0.129925	1e-05	0.023372	1e-05	0.846673	1e-05	6	65
PI_500448	No	Zambia	ZM-1169	Cucurbita maxima	Wild	NA	NA	Africa	0.103924	1e-05	0.011375	1e-05	0.884671	1e-05	6	57
PI_500513	No	Zambia	ZM-2348	Cucurbita maxima	Cultivated	NA	Mixed with C. moschata.	Africa	0.05988	1e-05	0.053154	0.054058	0.751329	0.081569	6	81
PI_500451	No	Zambia	Mgwunga	Cucurbita maxima	Cultivated	NA	Fruit more watery than PI 500450. Local name Mgwunga.	Africa	0.100425	0.042474	1e-05	0.146655	0.710427	1e-05	6	10
PI_505614	No	Zambia	ZM/A 5014	Cucurbita maxima	Landrace	NA	NA	Africa	1e-05	1e-05	1e-05	1e-05	0.99995	1e-05	6	38
PI_500507	No	Zambia	ZM-2209	Cucurbita maxima	Cultivated	NA	NA	Africa	1e-05	0.010258	0.051592	0.043228	0.826678	0.068233	6	75
PI_500470	No	Zambia	Namundalangive	Cucurbita maxima	Cultivated	NA	Fruit oblong. Local name Namundalangive.	Africa	0.301202	0.058484	1e-05	0.197662	0.406131	0.03651	6	3
PI_500455	No	Zambia	Mauwa	Cucurbita maxima	Cultivated	NA	Local name Mauwa.	Africa	0.045845	0.053706	1e-05	0.092958	0.807471	1e-05	6	67
PI_500525	No	Zambia	ZM-2753	Cucurbita maxima	Cultivated	NA	NA	Africa	0.069511	0.037434	0.047586	1e-05	0.841524	0.003936	6	60
PI_494840	No	Zambia	ZFA 3569	Cucurbita maxima	Landrace	NA	Received as Cucurbita moschata.	Africa	1e-05	1e-05	0.050737	1e-05	0.949223	1e-05	6	26
PI_494843	No	Zambia	ZFA 3665	Cucurbita maxima	Landrace	NA	Received as Cucurbita moschata.	Africa	0.03124	1e-05	1e-05	0.11015	0.856695	0.001895	6	48
PI_500524	No	Zambia	ZM-2750	Cucurbita maxima	Cultivated	NA	NA	Africa	0.055538	1e-05	0.005685	0.047774	0.85731	0.033682	6	63
PI_500531	No	Zambia	ZM-2901	Cucurbita maxima	Cultivated	NA	NA	Africa	0.051512	1e-05	0.040633	0.018725	0.88911	1e-05	6	62
PI_500520	No	Zambia	ZM-2614	Cucurbita maxima	Cultivated	NA	Mixed with C. moschata.	Africa	0.072203	1e-05	0.034906	0.063711	0.82916	1e-05	6	69
PI_500528	No	Zambia	ZM-2772	Cucurbita maxima	Cultivated	NA	NA	Africa	0.035949	1e-05	0.040587	0.04247	0.879206	0.001778	6	61
PI_500529	No	Zambia	Fipushi	Cucurbita maxima	Cultivated	NA	Local name Fipushi.	Africa	0.08399	1e-05	0.009793	0.125621	0.567712	0.212873	6	94
PI_500471	No	Zambia	Mupusi	Cucurbita maxima	Cultivated	NA	Fruit oblong. Seeds white. Local name Mupusi.	Africa	0.008723	0.000605	1e-05	1e-05	0.990642	1e-05	6	44
PI_494841	No	Zambia	ZFA 3576	Cucurbita maxima	Landrace	NA	Received as Cucurbita moschata.	Africa	1e-05	1e-05	0.014942	1e-05	0.983772	0.001256	6	47
PI_500523	No	Zambia	Chipusi	Cucurbita maxima	Cultivated	NA	Local name Chipusi.	Africa	1e-05	0.013017	0.010495	1e-05	0.976458	1e-05	6	46
PI_500505	No	Zambia	ZM-2144	Cucurbita maxima	Cultivated	NA	NA	Africa	1e-05	1e-05	1e-05	0.113024	0.886936	1e-05	6	50
PI_507884	No	Hungary	2701065	Cucurbita maxima	Landrace	NA	NA	Europe	1e-05	0.392858	0.010151	0.140391	1e-05	0.45658	5	132
PI_507881	No	Hungary	2701054	Cucurbita maxima	Landrace	NA	NA	Europe	0.000991	0.368342	1e-05	0.221758	1e-05	0.408889	5	133
PI_507879	No	Hungary	2700887	Cucurbita maxima	Landrace	NA	NA	Europe	0.140967	0.178277	1e-05	0.205133	1e-05	0.475603	3	290
PI_507877	No	Hungary	2700815	Cucurbita maxima	Landrace	NA	NA	Europe	0.22561	0.224413	1e-05	0.161539	0.236028	0.1524	5	128
PI_260652	No	Mexico	No. 2243	Cucurbita maxima	NA	NA	Bush type.	South/Latin America	1e-05	0.006373	0.285871	0.561692	0.146044	1e-05	1	446
PI_512110	No	Mexico	Calabaza de Castilla	Cucurbita maxima	Wild	NA	Single fruit, round, bright orange. Reportedly grown nearby in San Luis de la Paz. C. maxima rarely grown in Mexico.	South/Latin America	0.132996	0.175418	0.031725	0.434051	1e-05	0.2258	5	107
PI_532720	No	Democratic Republic of the Congo	Malenge, (Mbika)	Cucurbita maxima	Landrace	NA	Bandibu tribe, Kikongo language. Planted March, harvested June. Courge type.	Africa	0.342013	1e-05	1e-05	1e-05	0.657947	1e-05	6	17
PI_532727	No	Democratic Republic of the Congo	Mantete	Cucurbita maxima	Landrace	NA	Bampende tribe, Kimpende language. Planted September/October, harvested January/February. Mubungi type.	Africa	0.261875	1e-05	1e-05	0.021349	0.716746	1e-05	6	16
PI_532737	No	Democratic Republic of the Congo	Mantete (courge)	Cucurbita maxima	NA	NA	Bambala, Bangongo tribes, Kikongo language.	Africa	0.270955	0.00118	1e-05	0.073224	0.65462	1e-05	6	15
PI_532715	No	Democratic Republic of the Congo	Mbika	Cucurbita maxima	Landrace	NA	Bandibu tribe, Kikongo language. Planted March, harvested July. Courge type.	Africa	0.29495	1e-05	1e-05	0.078493	0.599887	0.02665	6	14
PI_532736	No	Democratic Republic of the Congo	Mbika, (courge), Mantete	Cucurbita maxima	NA	NA	Bangongo tribe, Kikongo language. Planted September harvested December.	Africa	0.12438	0.010239	1e-05	0.072031	0.79333	1e-05	6	72
PI_540417	No	Uzbekistan	U 047	Cucurbita maxima	Cultivated	NA	Bush; used for fodder.	Asia	0.173513	0.110222	0.153814	0.530003	0.032438	1e-05	1	454
PI_234253	No	Japan	Uschiki	Cucurbita maxima	NA	NA	NA	Asia	1e-05	0.109102	1e-05	0.890858	1e-05	1e-05	1	402
PI_512797	No	Spain	E-CU-13	Cucurbita maxima	Landrace	NA	Sown April, harvested September. Used for stew.	Europe	0.000487	1e-05	1e-05	0.999473	1e-05	1e-05	1	396
PI_512734	No	Spain	AN-CU-31	Cucurbita maxima	Landrace	NA	Sown May-June, harvested September-October. Used cooked and for stew.	Europe	0.453954	0.0359	0.049106	0.238141	0.088359	0.13454	2	336
PI_249914	No	Spain	No. 16957	Cucurbita maxima	NA	NA	Summer squash.	Europe	0.413138	1e-05	1e-05	0.465907	1e-05	0.120925	1	414
PI_512781	No	Spain	CM-CU-2	Cucurbita maxima	Landrace	NA	Sown beginning May, harvested July-August.	Europe	0.65699	1e-05	1e-05	0.066786	0.145636	0.130568	2	360
PI_512727	No	Spain	AN-CU-22	Cucurbita maxima	Landrace	NA	Sown April-May, harvested September-October. Used for stews.	Europe	0.64755	1e-05	1e-05	0.307268	0.033426	0.011736	2	324
G_29793	No	Spain	Calabaza Mediana	Cucurbita maxima	Landrace	NA	Sown February/March, harvested August/September. Used as food (stew).	Europe	0.523669	1e-05	0.133841	0.34246	1e-05	1e-05	2	327
PI_512746	No	Spain	AN-CU-44	Cucurbita maxima	Landrace	NA	Sown April, harvested July-August. Used cooked and for stews.	Europe	0.479665	1e-05	0.027804	0.247523	0.082714	0.162284	2	337
G_29313	No	Spain	Verde de Espana	Cucurbita maxima	Landrace	NA	NA	Europe	0.737402	1e-05	0.023853	0.177022	0.048551	0.013162	2	322
PI_512671	No	Spain	V-CU-1	Cucurbita maxima	Landrace	NA	Sown April, harvested September. Leaves dry.	Europe	0.708356	1e-05	0.028343	0.263272	1e-05	1e-05	2	325
PI_512835	No	Spain	V-CU-52	Cucurbita maxima	Landrace	NA	Sown March, harvested September. Used for jam.	Europe	1e-05	0.885658	1e-05	0.114302	1e-05	1e-05	5	160
PI_512677	No	Spain	V-CU-29	Cucurbita maxima	Landrace	NA	Sown in spring, harvested in summer. Used domestically.	Europe	0.727927	1e-05	1e-05	0.272033	1e-05	1e-05	2	326
G_29317	No	Spain	Teta de Vaca	Cucurbita maxima	Landrace	NA	Sown May, harvested October. Used as adornment	Europe	1e-05	0.850417	1e-05	0.149543	1e-05	1e-05	5	159
PI_174821	No	Nepal	Kadu	Cucurbita maxima	NA	NA	Used as vegetable marrow.	Asia	0.235192	0.053513	0.010305	0.62141	0.07957	1e-05	1	409
G_29642	No	Nigeria	TB 84/2164 Plot 2 Rep 1 Fruit 1 Plt. 1	Cucurbita maxima	Cultivated	NA	Fruit oblong elipsoid. Fruit lenght 39cm, width 57.5cm. diameter 19.5cm, weight 5.16kg. Average seed yeild 263, seed weight 20gm. present. Leaves pinnately and deeply lobed, small size with smooth margins. Days to germination in field 7.3. Days to 50% flowering 72.3. Average stem length 161.3, rounded with tendrils present. Leaves cordate, large, dented with shallow lobes.	Africa	0.74829	1e-05	0.031057	0.124038	0.071804	0.024802	2	323
G_29643	No	Nigeria	TB 84/2164 Plot 2 Rep 2 Fruit 1 Plt. 1	Cucurbita maxima	Cultivated	NA	Fruit oblong elipsoid, fruit lenght 39cm, width 57.5cm. diameter 19.5cm, weight 5.16kg. Average seed yeild 263, seed weight 20gm. present. Leaves pinnately and deeply lobed, small size with smooth margins. Days to germination in field 7.3. Days to 50% flowering 72.3. Average stem length 161.3, rounded with tendrils present. Leaves cordate, large, dented with shallow lobes.	Africa	0.918907	0.081053	1e-05	1e-05	1e-05	1e-05	2	315
PI_166198	No	Nigeria	No Known Plant ID	Cucurbita maxima	NA	NA	NA	Africa	0.894888	1e-05	0.047279	1e-05	1e-05	0.057804	2	300
G_31131	No	Kazakhstan	Stolovar Zemnaya	Cucurbita maxima	NA	NA	NA	Asia	0.513416	0.016805	0.050607	0.207509	0.048496	0.163166	2	335
G_31128	No	Kazakhstan	Russiya	Cucurbita maxima	NA	NA	NA	Asia	0.507644	0.109353	0.022386	0.360598	1e-05	1e-05	2	328
G_31133	No	Kazakhstan	'Vitamin Sweet'	Cucurbita maxima	NA	NA	NA	Asia	0.547763	1e-05	1e-05	0.303815	1e-05	0.148392	2	334
G_31130	No	Kazakhstan	Mamornaya	Cucurbita maxima	NA	NA	NA	Asia	0.597399	0.03036	0.133852	1e-05	0.043882	0.194497	2	345
G_31129	No	Kazakhstan	Lindaniya	Cucurbita maxima	NA	NA	NA	Asia	0.302673	0.030262	1e-05	0.299086	0.097992	0.269976	5	123
PI_136446	No	Canada	No. 9	Cucurbita maxima	NA	NA	NA	North America	0.164152	0.333679	1e-05	0.418094	1e-05	0.084054	5	115
PI_136445	No	Canada	No. 8	Cucurbita maxima	NA	NA	NA	North America	0.111531	0.266463	0.027977	0.532579	1e-05	0.06144	1	432
PI_136444	No	Canada	No. 7	Cucurbita maxima	NA	NA	NA	North America	0.031014	0.221547	1e-05	0.567938	1e-05	0.179481	1	429
PI_181762	No	Lebanon	Potiron	Cucurbita maxima	NA	NA	NA	Arab States	0.884743	0.062527	1e-05	1e-05	0.003857	0.048853	2	299
PI_214121	No	Bolivia	Zapallo	Cucurbita maxima	NA	NA	NA	South/Latin America	0.161367	1e-05	0.040297	0.757022	0.041294	1e-05	1	389
PI_349348	No	Bolivia	No Known Plant ID	Cucurbita maxima	Cultivated	NA	Fruit not seen; seeds medium sized, dark brown, margin same as seeds.	South/Latin America	0.19714	0.425782	1e-05	0.377047	1e-05	1e-05	5	116
PI_560951	No	Bolivia	Zapallo	Cucurbita maxima	Cultivated	NA	Cylindrical squash, 40cm long, 15cm diam., shallowly ribbed. Color orange and olive drab. Peduncle corky. Flesh thick, firm, dark orange. Seeds white. Grown locally.	South/Latin America	1e-05	1e-05	0.000722	0.325261	0.673988	1e-05	6	91
PI_560947	No	Bolivia	Joco	Cucurbita maxima	Cultivated	NA	Elongate, semi-cylindrical, ribbed squash, 35cm long, 15cm diam. Color predominantly salmon orange with some green at apex. Peduncle swollen, corky, green. Flesh orange. Seeds white. Grown locally.	South/Latin America	1e-05	1e-05	1e-05	0.319333	0.680627	1e-05	6	92
PI_349350	No	Bolivia	No Known Plant ID	Cucurbita maxima	Cultivated	NA	Reported to have come from local market. Vine typical maxima, poor vigor; fruit flattened 15 by 25 cm.; grayish mottled skin, smooth; very hard; flesh well colored, thick. Seeds yellowish brown, margin light brown. Fruit 'Hubbard' type.	South/Latin America	0.011202	1e-05	0.141522	0.592156	0.068942	0.186168	1	460
PI_349347	No	Bolivia	No Known Plant ID	Cucurbita maxima	Cultivated	NA	Fruit about 15 cm. diameter, 30 cm. long, skin light grayish green, warted overall; very hard skin; thin flesh, light salmon. Seeds light brown with margin lighter than body.	South/Latin America	0.098336	1e-05	0.091756	0.671654	1e-05	0.138235	1	457
PI_560950	No	Bolivia	Zapallo	Cucurbita maxima	Cultivated	NA	Spheroid squash, 15cm long, 22cm diam., deeply ribbed. Color drab olive. Peduncle insertion depressed, corky, stigma scar corky. Flesh thick, firm, orange. Seeds white, 1.5cm long. Grown locally.	South/Latin America	1e-05	1e-05	0.043708	0.236719	0.719542	1e-05	6	89
PI_543227	No	Bolivia	Jemi (Esse Ejja)	Cucurbita maxima	Cultivated	NA	Fruit spherical or egg-shaped, to 30cm long, strongly ribbed, orange, with corky peduncle. Flesh is firm, thick and orange, seeds white and numerous. Squash cultivated locally by Indians on sandbars and in chacos.	South/Latin America	1e-05	1e-05	1e-05	0.37961	0.62035	1e-05	6	90
PI_365106	No	Eswatini	AJO 0271	Cucurbita maxima	NA	NA	NA	Africa	0.137654	1e-05	1e-05	0.279391	0.359993	0.222942	5	102
PI_508084	No	United States	'Sibley'	Cucurbita maxima	Cultivar	NA	Plant indeterminate, maturity Group I, high yielding.. Flowers white, pods brown with gray pubescence. Seeds yellow, dull. Resistance to races 1 and 2 of Phytophthora root rot.	North America	NA	NA	NA	NA	NA	NA	NA	NA
G_30407	No	United States	'Japan Cup F1'	Cucurbita maxima	Cultivar	Kobocha	NA	North America	NA	NA	NA	NA	NA	NA	NA	NA
G_32228	Yes	United States	Black Eagle	Cucurbita maxima	Cultivar	NA	NA	North America	NA	NA	NA	NA	NA	NA	NA	NA
G_30409	No	United States	'Sweet Mama F1'	Cucurbita maxima	Cultivar	Kobocha	NA	North America	NA	NA	NA	NA	NA	NA	NA	NA
G_30406	No	United States	'Delica F1'	Cucurbita maxima	Cultivar	Kuri	NA	North America	NA	NA	NA	NA	NA	NA	NA	NA
G_32229	Yes	United States	Daytona	Cucurbita maxima	Cultivar	NA	NA	North America	NA	NA	NA	NA	NA	NA	NA	NA
G_30408	No	United States	'Nutty Delica F1'	Cucurbita maxima	Cultivar	Kobocha	NA	North America	NA	NA	NA	NA	NA	NA	NA	NA
PI_224669	No	United States	Bush Buttercup	Cucurbita maxima	Cultivar	Buttercup	Selected from an unknown PI number in 1938.	North America	NA	NA	NA	NA	NA	NA	NA	NA
PI_318424	No	United States	Ames 715	Cucurbita maxima	Breeding	NA	Inbred selection. Vigorous, medium maturing, bush. Fruits many, oblate 5 to 6 by 7 to 8 inches, orange or salmon; 3.57 pounds; flesh 1 to 2 inches, light orange.	North America	NA	NA	NA	NA	NA	NA	NA	NA
G_28106	No	Mexico	G 28106	Cucurbita maxima	Cultivar	NA	NA	South/Latin America	NA	NA	NA	NA	NA	NA	NA	NA
PI_196845	No	Ethiopia	No. 10067	Cucurbita maxima	Cultivar	NA	NA	Africa	NA	NA	NA	NA	NA	NA	NA	NA
PI_318430	No	United States	Ames 721	Cucurbita maxima	Breeding	NA	Male sterile C. Buttercup type. Segregates (approximately) 1 normal to 1 male sterile. Vigorous, medium maturing, medium-sized vines. Fruits many, oblate turbinate 4.25 by 6 to 9 inches, dark green; 4.5 pounds; flesh .75 to 1.25 inches, orange.	North America	NA	NA	NA	NA	NA	NA	NA	NA
G_32321	Yes	Burundi	GMN 80	Cucurbita maxima	NA	NA	NA	Africa	NA	NA	NA	NA	NA	NA	NA	NA
PI_318428	No	United States	Ames 719	Cucurbita maxima	Breeding	NA	NA	North America	NA	NA	NA	NA	NA	NA	NA	NA
PI_318429	No	United States	Ames 720	Cucurbita maxima	Breeding	NA	Male sterile B. Segregates (approximately) 1 normal to 1 male sterile. Vigorous, medium maturing, semibush. Fruits oblate 7 to 9 by 8 to 12 inches, orange-red; 10 pounds; flesh 1.25 to 2.25 inches, orange.	North America	NA	NA	NA	NA	NA	NA	NA	NA
PI_318417	No	United States	Ames 708	Cucurbita maxima	Breeding	NA	Inbred selection. Vigorous, medium maturing, bush. Fruits many, oblate 5 to 6.5 by 7.75 inches, orange or salmon; 4.20 pounds; flesh .75 to 1.5 inches, orange.	North America	NA	NA	NA	NA	NA	NA	NA	NA
PI_234612	No	South Africa	Flat Boer	Cucurbita maxima	Cultivar	NA	NA	Africa	NA	NA	NA	NA	NA	NA	NA	NA
PI_601256	No	United States	'Dills Atlantic Giant'	Cucurbita maxima	Cultivar	Show	NA	North America	NA	NA	NA	NA	NA	NA	NA	NA
G_11299	No	United States	'Giant Walloper'	Cucurbita maxima	Cultivar	Show	NA	North America	NA	NA	NA	NA	NA	NA	NA	NA
PI_318421	No	United States	Ames 712	Cucurbita maxima	Breeding	NA	Inbred selection. Vigorous, medium maturing, bush. Fruits many, oblate 4.5 to 6.5 to 8 inches, dark green; 3.56 pounds; flesh 1 inch, bright orange.	North America	NA	NA	NA	NA	NA	NA	NA	NA
G_27892	No	France	Stock No. 7G EMB 91115	Cucurbita maxima	Cultivar	NA	NA	Europe	NA	NA	NA	NA	NA	NA	NA	NA
PI_318423	No	United States	Ames 714	Cucurbita maxima	Breeding	NA	Inbred selection. Vigorous, medium maturing, bush. Fruits many, oblate 4 to 4.5 by 7.5 to 8 inches, orange or salmon; 3.72 pounds; flesh .75 to 1.5 inches, yellow.	North America	NA	NA	NA	NA	NA	NA	NA	NA
PI_508462	No	South Korea	'Golden Cooker'	Cucurbita maxima	Cultivar	NA	Vine type. Maturity 30-35 days after flowering. Fruit flesh orange, dry, fine textured. Widely adapted to various soil types. Noted for excellent nut-like flavor when cooked. Cold tolerant.	Asia	NA	NA	NA	NA	NA	NA	NA	NA
G_32319	Yes	Burundi	GMN 138	Cucurbita maxima	NA	NA	NA	Africa	NA	NA	NA	NA	NA	NA	NA	NA
PI_325133	No	United States	Gold Nugget	Cucurbita maxima	Cultivar	Kuri	Bush with short internodes. Fruits round oblate, 590 grams; shell hard, red orange; flesh dark gold orange, fine texture, no fiber, dense, 3 cm. thick; early; 8 per plant.	North America	NA	NA	NA	NA	NA	NA	NA	NA
G_29515	No	Nepal	2167a	Cucurbita maxima	Cultivar	NA	NA	Asia	NA	NA	NA	NA	NA	NA	NA	NA
G_32379	Yes	Greece	G044	Cucurbita maxima	NA	NA	NA	Europe	NA	NA	NA	NA	NA	NA	NA	NA
G_32304	No	United States	'Mountaineer PS Hubbard'	Cucurbita maxima	Cultivar	Hubbard	NA	North America	NA	NA	NA	NA	NA	NA	NA	NA
G_28224	No	United States	'Sweet Mama'	Cucurbita maxima	Cultivar	Kobocha	NA	North America	NA	NA	NA	NA	NA	NA	NA	NA
PI_318422	No	United States	Ames 713	Cucurbita maxima	Breeding	NA	Inbred selection. Vigorous, medium maturing, bush. Fruits many, 6 to 7 by 7 to 8 inches, orange or salmon; 3.55 pounds; flesh 1 to 1.5 inches, orange.	North America	NA	NA	NA	NA	NA	NA	NA	NA
PI_318419	No	United States	Ames 710	Cucurbita maxima	Breeding	NA	Inbred selection. Vigorous, medium maturing, bush. Fruits 6 by 7.5 to 8.25 inches, orange or salmon; 3.21 pounds; flesh 1 to 2 inches, orange.	North America	NA	NA	NA	NA	NA	NA	NA	NA
PI_318420	No	United States	Ames 711	Cucurbita maxima	Breeding	NA	Inbred selection. Vigorous, medium maturing, bush. Fruits many, oblate 5 to 5.5 by 7.5 to 9 inches, orange or salmon; 4.82 pounds; flesh 1 to 1.5 inches, orange.	North America	NA	NA	NA	NA	NA	NA	NA	NA
PI_306124	No	Bulgaria	Plovdivska 48/4	Cucurbita maxima	Breeding	NA	NA	Europe	NA	NA	NA	NA	NA	NA	NA	NA
G_27743	No	United States	Big Max	Cucurbita maxima	Cultivar	Show	NA	North America	NA	NA	NA	NA	NA	NA	NA	NA
PI_234610	No	Australia	Turks Cap	Cucurbita maxima	Cultivar	NA	NA	Australia	NA	NA	NA	NA	NA	NA	NA	NA
G_32322	Yes	Burundi	GMN 7	Cucurbita maxima	NA	NA	NA	Africa	NA	NA	NA	NA	NA	NA	NA	NA
G_29517	No	Nepal	2168b	Cucurbita maxima	Cultivar	NA	NA	Asia	NA	NA	NA	NA	NA	NA	NA	NA
G_30405	No	United States	Uchiki Kuri	Cucurbita maxima	Cultivar	Kuri	NA	North America	NA	NA	NA	NA	NA	NA	NA	NA
PI_199508	No	Argentina	Trouce	Cucurbita maxima	Cultivar	NA	NA	South/Latin America	NA	NA	NA	NA	NA	NA	NA	NA
PI_512678	No	Spain	V-CU-33	Cucurbita maxima	Cultivar	NA	Sown March-April, harvested September-October. Used for local consumption.	Europe	NA	NA	NA	NA	NA	NA	NA	NA
G_28226	Yes	United States	'Orangetti'	Cucurbita maxima	Cultivar	NA	NA	North America	NA	NA	NA	NA	NA	NA	NA	NA
PI_137884	No	Iran	Kadu	Cucurbita maxima	Cultivar	NA	Fruit globose, 8 inches in diameter; rind orange red, with rib stripes of salmon; ribs faintly indented; flesh 1 1/4 inches thick, greenish yellow and insipid. PI book claims this acc. is C.Pepo	Asia	NA	NA	NA	NA	NA	NA	NA	NA
PI_299573	No	South Africa	AJO-0464	Cucurbita maxima	Cultivar	NA	NA	Africa	NA	NA	NA	NA	NA	NA	NA	NA
PI_318433	No	United States	Ames 724	Cucurbita maxima	Breeding	NA	Male sterile F. Segregates (approximately) 1 normal to 1 male sterile. Vigorous, bush type. Fruits many, oblate 1 to 1.25 inches, light orange.	North America	NA	NA	NA	NA	NA	NA	NA	NA
G_31832	No	Reunion	G 31832	Cucurbita maxima	Cultivar	NA	NA	Europe	NA	NA	NA	NA	NA	NA	NA	NA
PI_234608	No	South Africa	Queensland Blue	Cucurbita maxima	Cultivar	Australian	NA	Africa	NA	NA	NA	NA	NA	NA	NA	NA
G_27894	No	South Africa	G 27894	Cucurbita maxima	Cultivar	NA	NA	Africa	NA	NA	NA	NA	NA	NA	NA	NA
G_32711	No	Syria	S029	Cucurbita maxima	Cultivar	NA	NA	Arab States	NA	NA	NA	NA	NA	NA	NA	NA
G_25853	No	Peru	P-8579	Cucurbita maxima	Cultivar	NA	NA	South/Latin America	NA	NA	NA	NA	NA	NA	NA	NA
PI_512666	No	Spain	AN-CU-14	Cucurbita maxima	Cultivar	NA	Sown May, harvested September-October.	Europe	NA	NA	NA	NA	NA	NA	NA	NA
G_25854	No	Peru	P-8587	Cucurbita maxima	Cultivar	NA	NA	South/Latin America	NA	NA	NA	NA	NA	NA	NA	NA
G_13274	No	Austria	G 13274	Cucurbita maxima	Cultivar	NA	NA	Europe	NA	NA	NA	NA	NA	NA	NA	NA
PI_212009	Yes	Iran	No. 10	Cucurbita maxima	NA	NA	NA	Asia	NA	NA	NA	NA	NA	NA	NA	NA
PI_318427	No	United States	Ames 718	Cucurbita maxima	Breeding	NA	Inbred selection. Vigorous, medium maturing, bush. Fruits many, oblate 4 to 5 by 6 to 7.75 inches, copper; 4.47 pounds; flesh 1.5 inches, orange.	North America	NA	NA	NA	NA	NA	NA	NA	NA
PI_318415	No	United States	Ames 706	Cucurbita maxima	Breeding	NA	Inbred selection. Vigorous, medium maturing, bush. Fruits many, oblate 5 to 6 by 6 to 8 inches, orange or salmon; 3.75 pounds; flesh .75 to 1.5 inches, orange.	North America	NA	NA	NA	NA	NA	NA	NA	NA
PI_318416	No	United States	Ames 707	Cucurbita maxima	Breeding	NA	Inbred selection. Vigorous, medium maturing, bush. Fruits many, oblate 4.5 to 5.5 by 6.5 to 8 inches, orange or salmon; 4.75 pounds; flesh 1 to 1.5 inches, orange.	North America	NA	NA	NA	NA	NA	NA	NA	NA
G_23151	No	Japan	Tokyo Pumpkin	Cucurbita maxima	Cultivar	NA	NA	Asia	NA	NA	NA	NA	NA	NA	NA	NA
PI_318418	No	United States	Ames 709	Cucurbita maxima	Breeding	NA	Inbred selection. Vigorous, medium maturing, bush. Fruits oblate 4 by 7 to 9 inches, dark green with light stripes; 3.20 pounds; flesh .5 to 1.25 inches, orange.	North America	NA	NA	NA	NA	NA	NA	NA	NA
G_23034	No	Japan	Hokkaido Pumpkin	Cucurbita maxima	Cultivar	NA	NA	Asia	NA	NA	NA	NA	NA	NA	NA	NA
G_9187	No	Japan	Ucike Kuri	Cucurbita maxima	Cultivar	Kuri	NA	Asia	NA	NA	NA	NA	NA	NA	NA	NA
PI_135358	Yes	Afghanistan	No. 5049	Cucurbita maxima	NA	NA	Fruit globose, 11 inches in diameter; rind creamy white, with indented ribs; flesh yellow, 2 inches thick, insipid.	Asia	NA	NA	NA	NA	NA	NA	NA	NA
PI_234609	No	Australia	Queensland Blue (Beaudesert)	Cucurbita maxima	Cultivar	Australian	NA	Australia	NA	NA	NA	NA	NA	NA	NA	NA
PI_656590	No	United States	Red Gold Banana	Cucurbita maxima	Cultivar	NA	Lit. refer.-Amer. Veg. Grower Var. List, 12/68. Modified banana type squash, red gold-red skin; sweet yellow flesh.	North America	NA	NA	NA	NA	NA	NA	NA	NA
G_26105	No	United States	'Buttercup, Burgess Strain'	Cucurbita maxima	Cultivar	Buttercup	NA	North America	NA	NA	NA	NA	NA	NA	NA	NA
G_26542	No	United States	786 Emerald	Cucurbita maxima	Cultivar	Buttercup	NA	North America	NA	NA	NA	NA	NA	NA	NA	NA
PI_512684	No	Spain	V-CU-40	Cucurbita maxima	Cultivar	NA	Sown March, harvested July-August. Used for local consumption.	Europe	NA	NA	NA	NA	NA	NA	NA	NA
PI_318431	No	United States	Ames 722	Cucurbita maxima	Breeding	NA	NA	North America	NA	NA	NA	NA	NA	NA	NA	NA
PI_512667	No	Spain	AN-CU-16	Cucurbita maxima	Cultivar	NA	Sown May, harvested September-October.	Europe	NA	NA	NA	NA	NA	NA	NA	NA
G_26704	No	United States	'Blue Hubbard'	Cucurbita maxima	Cultivar	Hubbard	NA	North America	NA	NA	NA	NA	NA	NA	NA	NA
CItr_5666	No	United States	'Sibley'	Cucurbita maxima	Cultivar	NA	NA	North America	NA	NA	NA	NA	NA	NA	NA	NA
G_26694	No	United States	'Buttercup'	Cucurbita maxima	Cultivar	Buttercup	NA	North America	NA	NA	NA	NA	NA	NA	NA	NA
G_33181	No	United States	'Mammoth King'	Cucurbita maxima	Cultivar	Show	Note from Jesse Reil (donor): Seed was harvested from Mammoth King seed acquired from the late Tom Knocke's collection that originally came from Gurney's Seeds back in the late 1970's - early 1980's. The plants produced about 2 large pumpkins per vine. The fruit is show-type; large and standardized with an almost florescent beige color.	North America	NA	NA	NA	NA	NA	NA	NA	NA
G_28472	No	Brazil	'Varzea Alegre'	Cucurbita maxima	Cultivar	NA	NA	South/Latin America	NA	NA	NA	NA	NA	NA	NA	NA
G_23449	No	United States	Buttercup, Burgess Strain	Cucurbita maxima	Cultivar	Buttercup	NA	North America	NA	NA	NA	NA	NA	NA	NA	NA
G_30147	No	United States	'Mayo Blusher'	Cucurbita maxima	Cultivar	NA	Large, white to light green fruit. Round to elongated shape and blush pink when fully ripe. Apricot flesh is sweet. Good keeper.	North America	NA	NA	NA	NA	NA	NA	NA	NA
G_32997	No	United States	Blue Hubbard	Cucurbita maxima	Cultivar	Hubbard	Info. from Harris Co. 1959 cat. -- 110 days. Developed and grown by us, this extra lg, heavy-yielding strain is the truest most uniform stock we know. The fruit is an attrac- tive bl gray color, rough and rugged, and grows to enormous size Flesh is thick, deep yel. clr and fine flavor and texture. This is a profitable farm crop due to high demand. Good for gard. use due to heavy yield and excelle…	North America	NA	NA	NA	NA	NA	NA	NA	NA
G_26705	No	United States	'Buttercup'	Cucurbita maxima	Cultivar	Buttercup	NA	North America	NA	NA	NA	NA	NA	NA	NA	NA
PI_600834	No	United States	'Autumn Pride'	Cucurbita maxima	Cultivar	Hubbard	NA	North America	NA	NA	NA	NA	NA	NA	NA	NA
G_26544	No	United States	'770 Blue Hubbard'	Cucurbita maxima	Cultivar	Hubbard	NA	North America	NA	NA	NA	NA	NA	NA	NA	NA
G_32227	No	United States	Golden Eagle	Cucurbita maxima	Cultivar	Buttercup	NA	North America	NA	NA	NA	NA	NA	NA	NA	NA
G_32295	No	United States	'Buckskin'	Cucurbita maxima	Cultivar	NA	NA	North America	NA	NA	NA	NA	NA	NA	NA	NA
PI_318425	No	United States	Ames 716	Cucurbita maxima	Breeding	NA	Inbred selection. Vigorous, medium maturing, bush. Fruits many, oblate 5 by 7 to 8 inches, orange or salmon; 4.75 pounds; flesh 1 to 2 inches, light orange.	North America	NA	NA	NA	NA	NA	NA	NA	NA
PI_318426	No	United States	Ames 717	Cucurbita maxima	Breeding	NA	Inbred selection. Vigorous, medium maturing, bush. Fruits many, oblate 5 by 7 to 8 inches, copper; 4.90 pounds; flesh 1 to 2 inches, orange.	North America	NA	NA	NA	NA	NA	NA	NA	NA
G_22762	No	United States	'Aristocat'	Cucurbita maxima	Cultivar	NA	NA	North America	NA	NA	NA	NA	NA	NA	NA	NA
