# Supplementary material for: Characterization of the USDA Cucurbita pepo, C. moschata, and C. maxima germplasm collections
Source: Front Plant Sci. 2023 Mar 13;14:1130814. doi: 10.3389/fpls.2023.1130814 (PMC10040574; doi:10.3389/fpls.2023.1130814)
Supplement: Supplementary file 3 [file Table_2.xlsx]

## Sheet: Cpepo-genocore
Iteration	Sample_name	Coverage	Difference
1	PI_364241	32.7207	32.7207
2	Ames_21650	48.1405	15.4198
3	PI_181764	57.9084	9.76788
4	PI_614683	64.2549	6.34654
5	PI_357953	69.5789	5.32401
6	Ames_21644	73.2376	3.65864
7	PI_176551	75.9556	2.71809
8	PI_204694	78.1819	2.22625
9	PI_318826	80.0414	1.85952
10	PI_438699	81.5428	1.50142
11	PI_171623	82.8501	1.30727
12	PI_176536	83.9805	1.13038
13	PI_615120	84.9987	1.01821
14	PI_534567	85.8616	0.862887
15	PI_364240	86.5994	0.737769
16	PI_182198	87.294	0.694624
17	PI_511973	87.9412	0.647165
18	PI_368592	88.515	0.57382
19	PI_442316	89.0413	0.526361
20	PI_177377	89.5202	0.478902
21	PI_357937	89.9517	0.431444
22	PI_274787	90.3572	0.405557
23	PI_482592	90.7455	0.388299
24	PI_438717	91.1209	0.375356
25	PI_288240	91.4531	0.332212
26	PI_615144	91.7637	0.310639
27	PI_615141	92.0571	0.293382
28	PI_357970	92.3332	0.276124
29	PI_179269	92.6007	0.267495
30	PI_512787	92.8424	0.241608
31	PI_172872	93.0753	0.23298
32	PI_427095	93.2997	0.224351
33	PI_204698	93.5111	0.211407
34	PI_299574	93.7096	0.198464
35	PI_169457	93.8908	0.181206
36	PI_442310	94.0633	0.172577
37	PI_357969	94.2273	0.163949
38	PI_518689	94.3912	0.163949
39	PI_512185	94.5552	0.163949
40	PI_179270	94.7019	0.146691
41	PI_418966	94.8486	0.146691
42	PI_532356	94.9866	0.138062
43	PI_615095	95.1247	0.138062
44	PI_615108	95.2541	0.129433
45	PI_512805	95.3749	0.120804
46	PI_141660	95.4957	0.120804
47	PI_379317	95.6079	0.112175
48	Ames_26888	95.7201	0.112175
49	PI_227299	95.8236	0.103546
50	PI_512776	95.9272	0.103546
51	PI_508465	96.0221	0.0949176
52	PI_615147	96.117	0.0949176
53	PI_442339	96.2119	0.0949176
54	PI_172857	96.3068	0.0949176
55	PI_512188	96.3931	0.0862887
56	PI_165081	96.4794	0.0862887
57	PI_174187	96.5657	0.0862887
58	PI_169452	96.6434	0.0776598
59	PI_512785	96.721	0.0776598
60	PI_512813	96.7987	0.0776598
61	PI_614701	96.8763	0.0776598
62	PI_172868	96.9454	0.069031
63	PI_357923	97.0144	0.069031
64	PI_442297	97.0834	0.069031
65	PI_267660	97.1438	0.0604021
66	PI_512754	97.2042	0.0604021
67	Ames_24950	97.2646	0.0604021
68	PI_532354	97.325	0.0604021
69	PI_109486	97.3855	0.0604021
70	PI_212004	97.4372	0.0517732
71	PI_357965	97.489	0.0517732
72	PI_379312	97.5408	0.0517732
73	PI_532389	97.5925	0.0517732
74	PI_615116	97.6357	0.0431444
75	PI_512862	97.6788	0.0431444
76	PI_169438	97.722	0.0431444
77	PI_615119	97.7651	0.0431444
78	PI_172874	97.8083	0.0431444
79	PI_512881	97.8514	0.0431444
80	PI_612862	97.8946	0.0431444
81	PI_169451	97.9377	0.0431444
82	PI_173686	97.9808	0.0431444
83	PI_442306	98.024	0.0431444
84	PI_507886	98.0671	0.0431444
85	PI_171629	98.1016	0.0345155
86	PI_615151	98.1362	0.0345155
87	PI_172863	98.1707	0.0345155
88	PI_357893	98.2052	0.0345155
89	PI_525171	98.2397	0.0345155
90	PI_525173	98.2742	0.0345155
91	PI_406678	98.3087	0.0345155
92	PI_314806	98.3433	0.0345155
93	PI_534623	98.3778	0.0345155
94	PI_525170	98.4123	0.0345155
95	PI_442321	98.4468	0.0345155
96	PI_370467	98.4727	0.0258866
97	Ames_26875	98.4986	0.0258866
98	PI_176965	98.5245	0.0258866
99	PI_379324	98.5503	0.0258866
100	PI_615113	98.5762	0.0258866
101	PI_257287	98.6021	0.0258866
102	PI_379311	98.628	0.0258866
103	PI_379302	98.6539	0.0258866
104	Ames_26873	98.6798	0.0258866
105	PI_357922	98.7057	0.0258866
106	PI_185033	98.7316	0.0258866
107	PI_534562	98.7574	0.0258866
108	PI_261780	98.7833	0.0258866
109	PI_442291	98.8092	0.0258866
110	PI_615125	98.8351	0.0258866
111	PI_442296	98.861	0.0258866
112	PI_512789	98.8869	0.0258866
113	PI_615100	98.9128	0.0258866
114	PI_368597	98.9386	0.0258866
115	PI_512662	98.9645	0.0258866
116	PI_615092	98.9904	0.0258866
117	PI_442308	99.0077	0.0172577

## Sheet: Cmoschata-genocore
Iteration	Sample_name	Coverage	Difference
1	PI_288239	33.4271	33.4271
2	PI_438548	49.1684	15.7413
3	PI_511954	59.6017	10.4333
4	PI_458746	66.22	6.6183
5	PI_653064	71.4589	5.23887
6	PI_438708	75.3159	3.85697
7	PI_438724	78.0476	2.73171
8	PI_438579	80.3549	2.30727
9	PI_482487	82.3043	1.94946
10	PI_442267	83.8343	1.52996
11	Fairytale	85.1718	1.33748
12	PI_438553	86.334	1.16227
13	PI_574552	87.3482	1.01421
14	PI_438828	88.2637	0.915507
15	PI_560946	89.0633	0.799526
16	PI_438578	89.8134	0.750173
17	Chirimen	90.4797	0.666272
18	Seminole	91.0843	0.60458
19	PI_381818	91.6099	0.525614
20	PI_438723	92.1133	0.503405
21	PI_442257	92.5674	0.454052
22	PI_369346	92.977	0.409634
23	PI_634695	93.3595	0.382489
24	PI_312165	93.7099	0.35041
25	PI_438722	94.0455	0.335604
26	Grif_9457	94.3466	0.301056
27	PI_442274	94.6353	0.288718
28	PI_532381	94.8894	0.25417
29	PI_271341	95.1214	0.231961
30	PI_634701	95.3484	0.227026
31	PI_482586	95.5582	0.209752
32	PI_511948	95.7655	0.207285
33	PI_438759	95.953	0.187543
34	PI_475750	96.1356	0.182608
35	PI_442280	96.3034	0.167802
36	PI_438782	96.4663	0.162866
37	PI_438792	96.6144	0.14806
38	PI_489694	96.7525	0.13819
39	PI_550690	96.8809	0.128319
40	PI_438799	97.0042	0.123384
41	PI_438741	97.1227	0.118448
42	PI_358507	97.2362	0.113513
43	PI_201772	97.3398	0.103642
44	PI_172344	97.4435	0.103642
45	Meot_Jaeng_I_Ae	97.5422	0.0987069
46	PI_438794	97.6409	0.0987069
47	PI_442264	97.7297	0.0888362
48	PI_438767	97.8136	0.0839009
49	PI_438551	97.8877	0.0740302
50	PI_442250	97.9617	0.0740302
51	PI_438737	98.0308	0.0690949
52	PI_222760	98.0999	0.0690949
53	Shishigatani	98.1641	0.0641595
54	PI_458745	98.2282	0.0641595
55	PI_482560	98.2874	0.0592242
56	PI_560952	98.3417	0.0542888
57	PI_482538	98.396	0.0542888
58	PI_489695	98.4503	0.0542888
59	PI_438752	98.4997	0.0493535
60	PI_482491	98.549	0.0493535
61	PI_451835	98.5984	0.0493535
62	PI_438785	98.6428	0.0444181
63	PI_357918	98.6823	0.0394828
64	PI_449348	98.7217	0.0394828
65	PI_500488	98.7612	0.0394828
66	PI_438773	98.8007	0.0394828
67	PI_438815	98.8402	0.0394828
68	PI_257532	98.8747	0.0345474
69	PI_438790	98.9093	0.0345474
70	PI_550693	98.9438	0.0345474
71	PI_512161	98.9734	0.0296121
72	PI_209117	99.0031	0.0296121

## Sheet: Cmaxima-genocore
Iteration	Sample_name	Coverage	Difference
1	PI_494843	33.5117	33.5117
2	PI_458653	49.2271	15.7154
3	PI_357894	59.1558	9.92866
4	PI_458701	65.0416	5.88585
5	PI_500470	69.461	4.41934
6	PI_458669	73.2263	3.76536
7	PI_211990	76.1792	2.95283
8	PI_458673	78.5176	2.33849
9	PI_169404	80.4796	1.96195
10	PI_379298	82.0254	1.54578
11	PI_458672	83.373	1.3476
12	PI_370456	84.4828	1.10979
13	PI_174823	85.4736	0.990884
14	PI_560947	86.3456	0.871978
15	PI_143278	87.1581	0.812525
16	PI_534550	87.9112	0.753072
17	PI_93034	88.585	0.673801
18	PI_234612	89.1795	0.59453
19	PI_178894	89.7344	0.554895
20	PI_526246	90.2497	0.51526
21	G_33181	90.765	0.51526
22	PI_458660	91.2406	0.475624
23	PI_349350	91.6766	0.435989
24	PI_357896	92.0333	0.356718
25	PI_178890	92.39	0.356718
26	PI_135351	92.7071	0.317083
27	PI_368571	92.9845	0.277447
28	PI_165027	93.262	0.277447
29	PI_181911	93.5394	0.277447
30	PI_178889	93.7772	0.237812
31	PI_482471	94.0151	0.237812
32	PI_120440	94.2529	0.237812
33	PI_458702	94.4907	0.237812
34	G_9187	94.7285	0.237812
35	PI_135363	94.9267	0.198177
36	PI_141637	95.1249	0.198177
37	G_23151	95.323	0.198177
38	PI_560951	95.5212	0.198177
39	PI_407385	95.6797	0.158541
40	PI_482523	95.8383	0.158541
41	G_31133	95.9968	0.158541
42	PI_518678	96.1554	0.158541
43	PI_141640	96.3139	0.158541
44	PI_318424	96.4725	0.158541
45	PI_482483	96.5914	0.118906
46	G_28472	96.7103	0.118906
47	PI_357872	96.8292	0.118906
48	PI_165558	96.9481	0.118906
49	PI_141638	97.067	0.118906
50	PI_534547	97.1859	0.118906
51	PI_532720	97.3048	0.118906
52	G_26105	97.4237	0.118906
53	G_23726	97.5426	0.118906
54	PI_137860	97.6615	0.118906
55	G_30407	97.7804	0.118906
56	PI_174181	97.8597	0.0792707
57	PI_368580	97.939	0.0792707
58	G_27894	98.0182	0.0792707
59	PI_368567	98.0975	0.0792707
60	PI_458690	98.1768	0.0792707
61	PI_193500	98.256	0.0792707
62	PI_512678	98.3353	0.0792707
63	PI_512797	98.4146	0.0792707
64	PI_368576	98.4939	0.0792707
65	PI_143272	98.5731	0.0792707
66	PI_357907	98.6524	0.0792707
67	missing	98.7317	0.0792707
68	PI_318431	98.8109	0.0792707
69	G_30655	98.8902	0.0792707
70	PI_163227	98.9298	0.0396354
71	PI_656590	98.9695	0.0396354
72	PI_500459	99.0091	0.0396354
